## 16 **Abstract**

17 Chikungunya is an *Aedes*-borne disease therefore its dynamics are impacted by the vector's  
18 ecology. We analysed the spatio-temporal distribution of the first chikungunya epidemic in Rio de  
19 Janeiro, estimating the effect of the socioeconomic and environmental factors as proxies of  
20 mosquitoes abundance. We fitted spatial models using notified cases counts by neighbourhood and  
21 week. To estimate the instantaneous and the memory effect of the temperature we used a transfer  
22 function. There were 13627 chikungunya cases in the study period. The sociodevelopment index,  
23 especially in the beginning of the epidemic, was inversely associated with the risk of cases, whereas  
24 the green area proportion effect was null for most weeks. The temperature increased the risk of  
25 chikungunya in most areas and this effect propagated for longer where the epidemic was  
26 concentrated. Factors related to the *Aedes* mosquitoes contribute to understanding the spatio-  
27 temporal dynamics of urban arboviral diseases.

28

29 Key-words: chikungunya, spatial model, epidemiology

## 30 Introduction

31 The first chikungunya virus (CHIKV) epidemic in Rio de Janeiro city, the second most  
32 populated city in Brazil and its main tourist destination, occurred in 2016 (de Souza et al., 2018).  
33 CHIKV is transmitted to humans by the same vectors as dengue viruses (DENV), the *Aedes*  
34 mosquitoes (WHO, 2017). Vector-control activities have not prevented Rio de Janeiro from being  
35 endemic for dengue for years, nor from having experienced large dengue epidemics, in general,  
36 every three to four years (Honório et al., 2009c; Nogueira et al., 1999; Santos et al., 2019).

37 For an arbovirus epidemic to occur three main elements are necessary, represented by the  
38 blue circle in Figure 1: mosquito population, susceptible human population, and the virus  
39 circulating (Kuno, 1995; Randolph and Rogers, 2010; Teixeira et al., 2009). The *Ae. aegypti*  
40 mosquito is present all over the city of Rio de Janeiro, facilitating a new arbovirus is established and  
41 spread quickly. Despite sharing the same vector, CHIKV and DENV belong to different families,  
42 which means that previous immunity to DENV does not cross-react with CHIKV and the  
43 population of Rio de Janeiro could be considered equally naïve to CHIKV before 2016. Therefore,  
44 the occurrence of local transmission was conditioned by the entry of the virus.

45 **Figure 1. A theoretical model for a chikungunya epidemic in a given region. Direct**  
46 **associations are represented by black arrows and indirect associations by red arrows. The**  
47 **blue area includes the necessary elements for the epidemic to occur.**

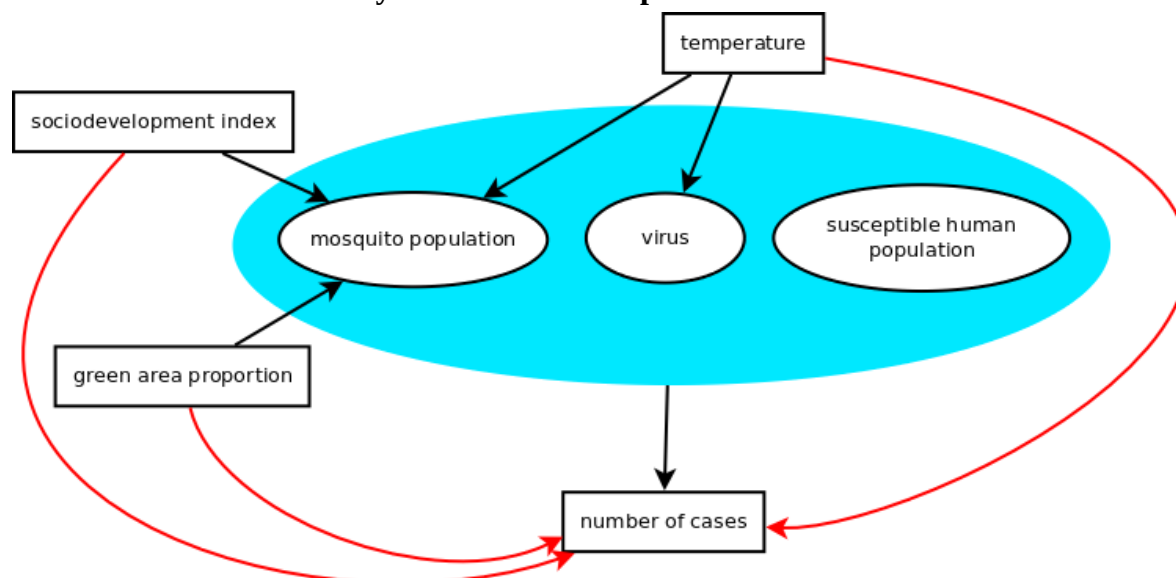

48

49         Reliable data on vector population, susceptible human population, and time of the entry of  
50 the virus, are not available at the intra-urban level in Rio de Janeiro city. Therefore, socioeconomic  
51 and environmental factors that have a direct effect (represented by black arrows in Figure 1) on the  
52 unmeasured elements can be considered to understand the spatio-temporal dynamics of the  
53 chikungunya epidemic by estimating their indirect association (represented by red arrows in Figure  
54 1) with the number of cases. The mosquito population varies within the city and with time, as the  
55 mosquito ecology is affected by environmental factors such as the level of urbanization and  
56 temperature. *Ae. aegypti* mosquitoes are highly adapted to urban settings, and the proportion of  
57 green area is inversely correlated with the level of urbanization (Rosa-Freitas et al., 2010). The  
58 socioeconomic status impacts the mosquito population as disorderly urbanization and inadequate  
59 sanitary conditions favour the presence of the mosquito most common reproduction site: containers  
60 filled with water found inside or in the surroundings of domiciles (Carvalho et al., 2017; Honório et  
61 al., 2009a). The temperature affects the life cycle and the activity of the mosquito and the  
62 incubation period of the virus, with maximal transmission occurring around 26–29°C (Mordecai et  
63 al., 2017).

64         Statistical models are traditional tools to study diseases. In the last decades, models that take  
65 into account the spatial dependency structure of the cases have been applied to better understand  
66 arboviral diseases epidemics (Carvalho et al., 2020; Lowe et al., 2011, 2018b), and the application  
67 of such models for intra-urban settings is growing more recently (Martínez-Bello et al., 2018, 2017;  
68 McHale et al., 2019; Teixeira and Cruz, 2011). Adjacent areas supposedly share similar  
69 characteristics. The inclusion of a (latent) spatial random effect, after adjusting for available  
70 covariates, accounts for both the spatial structure and unmeasurable factors (Morris et al., 2019).  
71 We applied spatial models, more specifically, intrinsic conditional autoregressive (ICAR) models  
72 (Besag, 1974), in which the the latent spatial effect in a given area depends on the spatial effects of

73 the neighbouring areas. We aimed to study the spatio-temporal dynamics of the first chikungunya  
74 epidemic in Rio de Janeiro city, exploring the effects of temperature, green area proportion and  
75 sociodevelopment index.

76

## 77 **Methods**

### 78 **Study site**

79 Rio de Janeiro is the second-largest city in Brazil with 6,3 million inhabitants (2010) and its  
80 primary tourist destination. Rio's area is of 1204 km<sup>2</sup>, with 160 neighbourhoods grouped into four  
81 large regions (Downtown, South, North and West). These regions are subdivided in 10 health  
82 districts called programmatic areas: area 1.0 (Downtown region); areas 2.1 and 2.2 (South region);  
83 areas 3.1, 3.2, 3.3 (North region); and areas 4.0, 5.1, 5.2 and 5.3 (West region) (Figure 2).

84 **Figure 2. Rio de Janeiro city by programmatic areas and neighbourhoods, 2010, Brazil.**

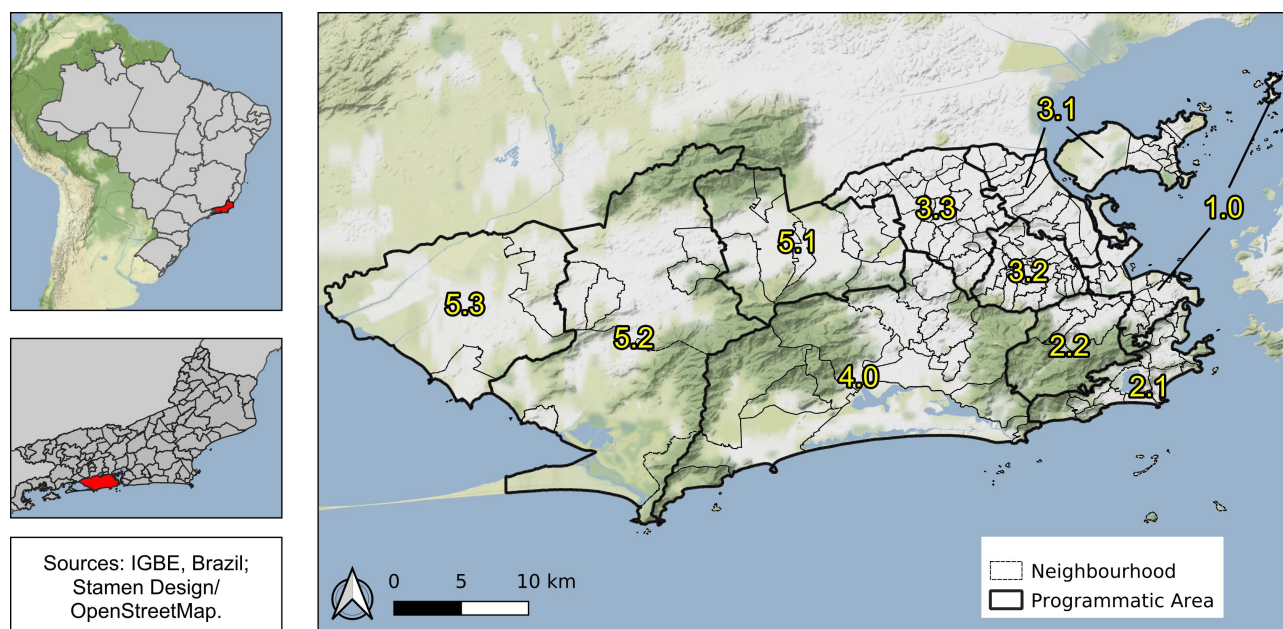

86 With three mountain massifs and 84 km of beaches, Rio has a diverse geography that is  
87 directly associated with the history of occupation and with socioeconomic disparities (Prefeitura do  
88 Rio de Janeiro, n.d.). The Downtown region is the historical, commercial and financial centre of the

89 city, with many cultural establishments. The South region is the most popular tourist destination,  
90 with famous beaches and wealthy neighbourhoods, while in the North region there are very large  
91 slums (“favelas”) and nearly 27% of the population, almost 2.4 million people, living in such  
92 communities (Cavallieri and Vial, 2012). The West region has more heterogeneous characteristics  
93 among its neighbourhoods, being the area 5.1 more densely populated, areas 5.2 and 5.3 less  
94 urbanized, and area 4.0 wealthier.

95

## 96 **Data**

### 97 *Chikungunya cases*

98 Data on chikungunya cases were obtained from the Notifiable Diseases Information System  
99 (SINAN) via the Rio de Janeiro Municipal Secretariat of Health and are publicly available  
100 (Prefeitura do Rio de Janeiro and Secretaria Municipal de Saúde, 2016). Cases were geocoded to  
101 the neighbourhood of the patient’s residence by the Municipal Secretariat of Health.

102 We analysed notified cases of chikungunya (confirmed by laboratory or clinical-  
103 epidemiological criteria) occurring in Rio de Janeiro municipality between January and December  
104 2016, by week and neighbourhood.

105 Case definitions follow Ministry of Health protocols. A suspected case of chikungunya is  
106 defined as a patient with sudden fever of over 38.5°C and severe arthralgia or arthritis not explained  
107 by other conditions, and who either lives in endemic areas or has visited one up to two weeks before  
108 the onset of symptoms or has an epidemiological link with a confirmed case. A confirmed case is a  
109 suspected case with at least one positive specific laboratory test for CHIKV or confirmed by  
110 clinical-epidemiological criteria (Ministério da Saúde, 2017).

### 111 *Socioeconomic data*

112 Population and sociodevelopment index data by neighbourhood were obtained from the  
113 Instituto Pereira Passos (Prefeitura do Rio de Janeiro, 2019a, 2019b). The sociodevelopment index

114 is based on eight indicators from the 2010 Demographic Census: 1) the percentage of domiciles  
115 with adequate water supply; 2) the percentage of domiciles with adequate sewage; 3) the percentage  
116 of domiciles with garbage collection; 4) the average number of toilets per resident; 5) the  
117 percentage of illiteracy among residents between 10 and 14 years old; 6) per capita income of the  
118 domiciles, expressed as minimum wages; 7) the percentage of domiciles with per capita income up  
119 to one minimum wage, and 8) the percentage of domiciles with per capita income greater than 5  
120 minimum wage. The sociodevelopment index is calculated as the arithmetic average of the  
121 normalized indicators (each ranging from 0 to 1, being 0 the worst socioeconomic condition and 1,  
122 the best) (Prefeitura do Rio de Janeiro, 2019b).

### 123 *Environment and temperature data*

124 Land use data for the city of Rio de Janeiro were obtained from the Instituto Pereira Passos as  
125 a shapefile (Prefeitura do Rio de Janeiro, 2019c). We created the category “green area” by  
126 aggregating: agricultural areas, areas with swamps and shoals, areas with tree and shrub cover, and  
127 areas with woody-grass cover. Thereafter, we calculated the proportion of green area for each  
128 neighbourhood (Figure 4B).

129 Temperature information was obtained from 38 meteorological weather stations in Rio de  
130 Janeiro from 5 different meteorological and environmental institutes for 2016. The institutes are the  
131 Brazilian National Institute of Meteorology (INMET, n.d.), the Brazilian Airspace Control  
132 Department (DECEA, n.d.), the Rio de Janeiro State Environmental Institute (INEA, n.d.), the Rio  
133 de Janeiro Municipal Environmental Secretariat (SMAC, n.d.) and the Alerta Rio System  
134 (Prefeitura do Rio de Janeiro, n.d.), and its measurements are made according to the  
135 recommendations of the World Meteorological Organization (World Meteorological Organization,  
136 2007). All institutes make their meteorological data publicly available, being that the frequency of  
137 measurements of the first four organizations is hourly, while the Alerta Rio System realizes  
138 measurements every 15 minutes.

139 From the temperature measurements, we have computed the daily maximum, minimum and  
140 mean temperature, as well as we have evaluated the availability of the daily data in terms of missing  
141 measurements. The daily records that had more than 60% of missing measurements were excluded.  
142 We decided to use the minimum temperature as in tropical climates the minimum temperature acts  
143 as a limiting factor for the *Ae. aegypti* activity and population (Gomes et al., 2012; Lowe et al.,  
144 2017). We then obtained the minimum temperature for each week and station, and to obtain the  
145 minimum temperature by neighbourhood we applied universal kriging. Briefly, kriging is a method  
146 that uses a sample of data points to estimate the value of a given variable over a continuous space  
147 (Diggle and Ribeiro, 2007). First, we interpolated the minimum temperature to a grid with each unit  
148 measuring 500m x 500m. The grid with the meteorological weather stations is displayed in the  
149 Supplementary Material Figure 1. Then we obtained the minimum temperature of the  
150 neighbourhood by calculating the average of the minimum temperature of the grid units whose  
151 centroids were within the boundaries of the neighbourhood.

152 To process and organize the environmental data we used R version 3.6.1 (The R Foundation  
153 for Statistical Computing, 2020) and packages sf (Pebesma et al., 2019), geoR (Ripley et al., 2001)  
154 and tidyverse (Wickham and RStudio, 2017).

155

## 156 **Statistical analysis**

157 We used the Stan platform to fit spatial models, more specifically ICAR models, to a dataset  
158 consisting of neighbourhoods counts of chikungunya cases, exploring the effects of  
159 sociodevelopment index, green area proportion and minimum temperature. Let  $Y_{i,t}$  be the counts of  
160 chikungunya cases at neighbourhood  $i = 1, 2, \dots, n = 160$ , and week  $t = 1, 2, \dots, T$ , where

161  $Y_{i,t} \sim \text{Poisson}(\mu_{i,t})$  and we explored the following structures for  $\mu_{i,t}$ :

$$\text{Model 0} \quad \log(\mu_{i,t}) = \log(e_i) + \beta_0 + \phi_i$$

$$\text{Model 1} \quad \log(\mu_{i,t}) = \log(e_i) + \beta_0 + X'_i \beta_{k,t}$$



Model 2  $\log(\mu_{i,t}) = \log(e_i) + \beta_0 + X'_i \beta_{k,t} + \phi_i$

Model 3  $\log(\mu_{i,t}) = \log(e_i) + \beta_0 + U_{i,t} + \phi_i$

$$U_{i,t} = \rho_i U_{i,t-1} + \xi_i \text{Temperature}_{i,t}$$

Model 4  $\log(\mu_{i,t}) = \log(e_i) + \beta_0 + X'_i \beta_{k,t} + U_{i,t} + \phi_i$

$$U_{i,t} = \rho_i U_{i,t-1} + \xi_i \text{Temperature}_{i,t}$$

162 The spatial effect is represented by  $\phi$ , with each  $\phi_i$  being normally distributed with a mean  
 163 equal to the average of its neighbours (the neighbour relationship is written as  $i \sim j$ ), and its variance  
 164 decreases according to the number of neighbours  $d_i$ :

165 
$$p(\phi_i | \phi_{i \sim j}) = N\left(\frac{\sum_{i \sim j} \phi_i}{d_i}, \frac{\sigma}{d_i}\right) \quad (1)$$

166 For all models  $e_i$  is the expected number of chikungunya cases at neighbourhood  $i$ ,  
 167 representing the number of cases that would have been observed if there were no differences in the  
 168 incidence of cases across time and space:

169 
$$e_i = \left( \frac{\sum_{i=1}^n \sum_{t=1}^T Y_{i,t}}{\sum_{i=1}^n \text{population}_i} \text{population}_i \right) / T \quad (2)$$

170 Model 0 includes only the intercept ( $\beta_0$ ) and the spatial effect ( $\phi$ ). Model 1 represents the  
 171 model with covariates without the spatial component, where  $X'_i$  represents a vector of  $k$  covariates  
 172 and  $\beta_{k,t}$  is the coefficient of covariate  $k$  in week  $t$ . We decided to consider time-varying coefficients  
 173 for the covariates to explore if their effects in the number of cases vary as the epidemic progresses.  
 174 The covariates included in the  $X'_i$  vector were sociodevelopment index and proportion of green  
 175 area. The proportion of green area showed a skewed distribution, therefore this variable was  
 176 transformed to the cubic root. We also fitted models including the population density, but the 90%  
 177 credible interval of its coefficient included 0 for most weeks and the inclusion of this variable

178 reduced the model fitting, hence, it was not considered in the final model. Model 2 includes both the  
179 covariates and the spatial component.

180 The temperature influences the number of cases over different times, therefore we estimate  
181 its effect using a transfer function ( $U_{i,t}$ ) that considers that the temperature has an immediate effect  
182 ( $\zeta_i$ ) and that a proportion ( $\rho_i$ ) of this effect propagates through future times. This proportion  $\rho_i$  is  
183 called memory effect and can be any value between 0 and 1. The main advantage of using a transfer  
184 function is that there is no need to specify the lag of the effect, the lag estimation is data-driven  
185 (Alves et al., 2010). To combine and visualize both effects of the temperature, we obtained the  
186 impulse response function of the temperature for each neighbourhood. This function expresses the  
187 effect of a 1 unit increase in the temperature of one week propagating in time (Alves et al., 2010).  
188 Model 3 is model 0 adding the transfer function  $U_{i,t}$ . The temperature was standardized. Finally,  
189 model 4 is model 3 adding the covariates.

190 The models were fitted under the Bayesian framework using the Stan platform (Carpenter et  
191 al., 2017) to run 4 chains of 10000 iterations each where the first 5000 were the warmup. We used  
192 visual inspection of the chains and R-hat statistic to check convergence (Gelman and Rubin, 1992;  
193 Stan Development Team, n.d.). Model selection was based on the Watanabe-Akaike information  
194 criterion (WAIC) (Watanabe, 2010). It is worth mentioning that we also fitted models that  
195 considered the reparametrization of the Besag-York-Mollié (BYM2) as proposed by Riebler et al.,  
196 2016, but the random component was over 90% spatial, and the unstructured effect was not  
197 statistically important in none of the neighbourhoods.

198 For the statistical analysis we used R version 3.6.1 (The R Foundation for Statistical  
199 Computing, 2020) and packages rstan (Guo et al., 2019) and loo (Vehtari et al., 2017). Maps and  
200 graphs were created using QGIS version 3.12 (QGIS Development Team, 2020) and ggplot2  
201 version 3.2.0 (Wickham, 2016).

202

## 203 Results

204 Between January and December 2016, 13,627 cases of chikungunya were notified in the city  
205 of Rio de Janeiro, corresponding to an incidence of 21.6 cases per 10,000 inhabitants. The number  
206 of cases peaked at week 17/2016, with 1118 chikungunya cases (Figure 3A). The cumulative  
207 number of cases by neighbourhood ranged from 0 (Grumari, area 4.0) to 721 (Realengo, area 5.1).  
208 The highest incidence was found in Catumbi (area 1.0), of 211.0 cases per 10,000 inhabitants  
209 (Figure 3B).

210 **Figure 3. Notified chikungunya cases by week (A) and chikungunya cases cumulative**  
211 **incidence per 10,000 inhabitants by neighbourhood (B), January to December 2016, Rio de**  
212 **Janeiro city, Brazil.**

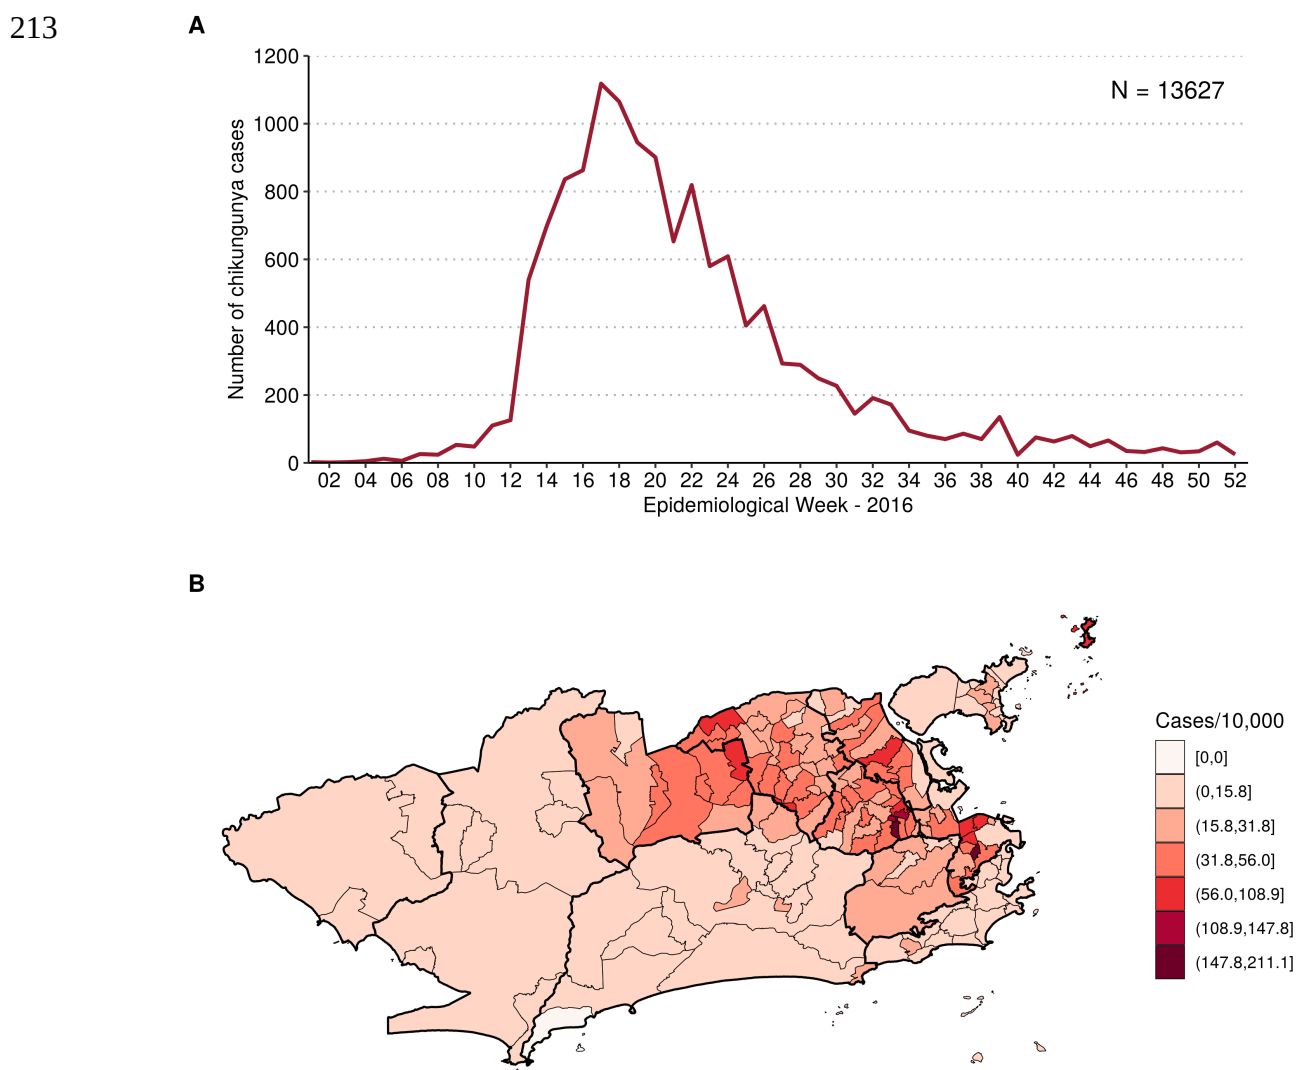

214 The mean sociodevelopment index was 0.6080, ranging from 0.282 in Grumari (area 4.0) to  
215 0.819 in Lagoa (area 2.1). Higher sociodevelopment indexes were observed in the areas 2.1 and 4.0  
216 (Figure 4A). Fifteen neighbourhoods did not have any green area, mostly located in areas 1.0, 3.1,  
217 3.2 and 3.3 (Figure 4B). Alto da Boa Vista (area 2.2) presented the highest percentage of green area,  
218 of 90.4%. The average minimum temperature was 19.9 °C, ranging from 10.7 °C in Campo dos  
219 Afonsos (area 5.1) to 26.1 °C in Cidade Nova (area 1.0). Neighbourhoods located in the east coastal  
220 region of Rio had higher temperatures on average (Figure 4C). Around week 17 the temperature  
221 decreased in the city, starting to increase again around week 35 (Figure 4D).

222 **Figure 4. Sociodevelopment index in 2010 (A), percentage of green area coverage in 2015 (B),**  
223 **and minimum temperature (°C) in 2016 average by neighbourhood (C) and boxplot by**  
224 **neighbourhood and week (D), Rio de Janeiro city, Brazil.**

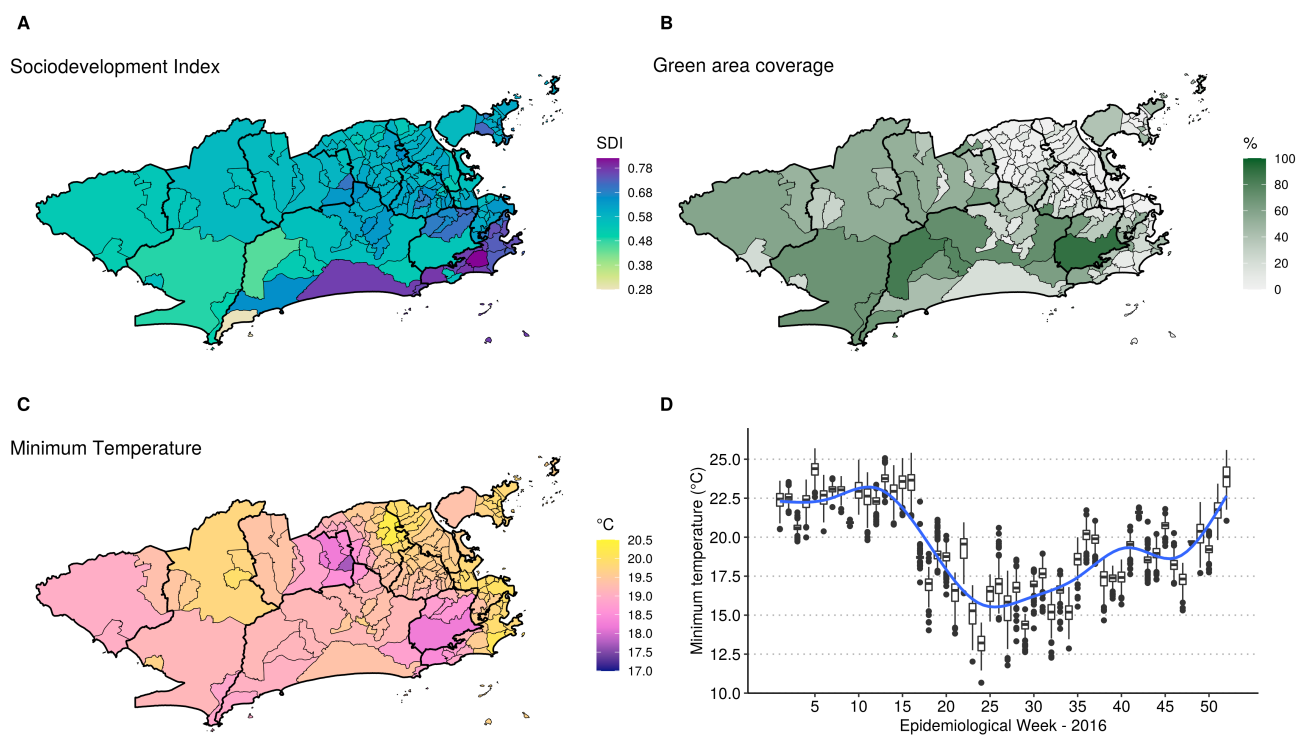

226 Due to the small numbers of chikungunya cases at the beginning of 2016, we decided to  
227 model the cases starting at week 9, when the number of cases in the city exceeded 50 for the first

228 time. Model 4 had the best fit (WAIC = 17934.8) followed by Model 2 (WAIC = 19656.6), Model 3  
229 (WAIC = 21262.1), Model 1 (WAIC = 26418.3) and finally Model 0 (WAIC = 34114.6).

230 The posterior summary of the time-varying coefficients for sociodevelopment index and  
231 proportion of green area for each model are presented in Figure 5. The sociodevelopment index  
232 consistently presented a protective effect, inversely associated with the epidemic curve. As the  
233 number of cases increased, the protective effect of the sociodevelopment index decreased,  
234 remaining almost constant during the peak of the epidemic, and increased again once the number of  
235 cases started decreasing. Actually, for Model 4 the effect of this variable was null during the peak of  
236 the epidemic (around week 17). The proportion of green area presented a protective effect in Model  
237 1. However, once we included the spatial component in the model, its effect moved towards the  
238 null.

239 **Figure 5. Time-varying coefficients (in the log scale) for sociodevelopment index (SDI) and**  
240 **green area proportion for spatial models for chikungunya cases from weeks 9 to 52 2016, Rio**  
241 **de Janeiro city, Brazil.**

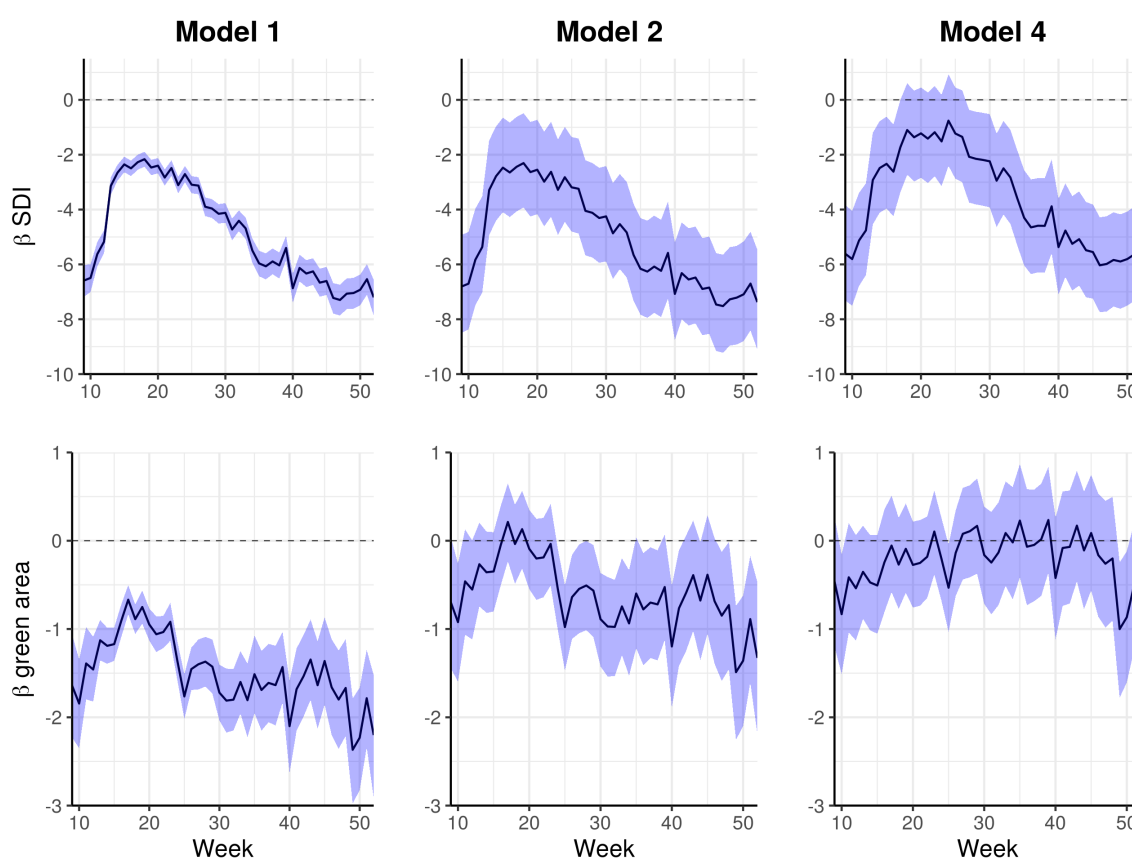

242

243 The inclusion of the covariates and the transfer function in Model 4 decreased the spatial  
244 effects compared to Model 0 in 102 of the 160 neighbourhoods (Supplementary Material Figure 2).  
245 Overall, all models presented similar spatial effects structure, with a clear trend of positive spatial  
246 effects in areas where the epidemic was concentrated (areas 1.0, 2.2, the mainland part of 3.1, 3.2,  
247 3.3 and 5.1) and negative spatial effects in less affected areas (Figure 6).

248 **Figure 6. Chikungunya cases spatial effects (in the log scale) for Model 4, weeks 9 to 52 2016,**  
249 **Rio de Janeiro city, Brazil.**

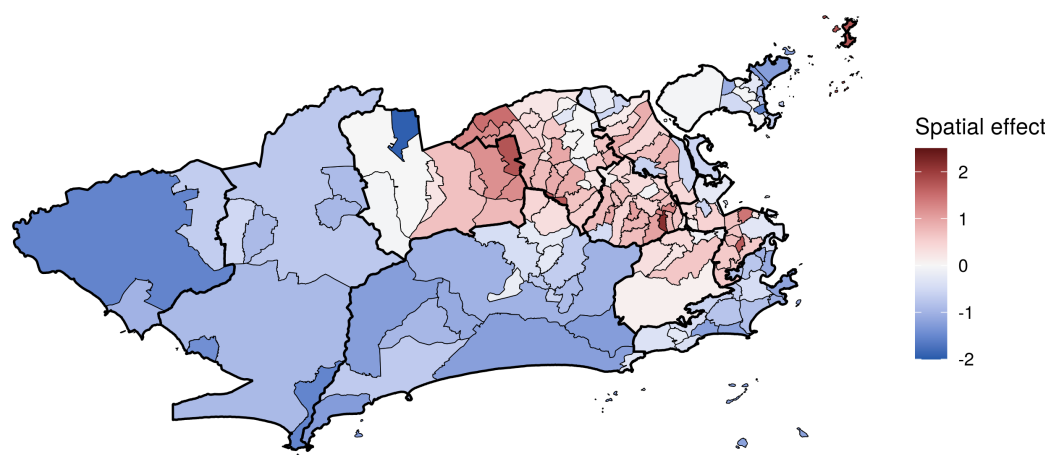

251 The posterior distributions of the instantaneous and memory effects of the minimum  
252 temperature are displayed in Figure 7. For most neighbourhoods (113/160, or 70.6%) the  
253 instantaneous effect of the temperature increased the risk of chikungunya cases (Figure 7A). The  
254 temperature instantaneous effect, however, was in general small, reaching its maximum in Catumbi  
255 (area 1.0), where the temperature relative risk was 2.28 (90%CI 2.07-2.53). The memory effect  
256 represents the proportion of the instantaneous effect that propagates in time. Therefore, for  
257 neighbourhoods where the temperature effect was null, the memory effect is irrelevant.

258 **Figure 7. Minimum temperature instantaneous effect (in the same week) (A) and memory**  
259 **effect (B) on chikungunya cases (in the log scale) by neighbourhood, mean and 90% credible**  
260 **interval, weeks 9 to 52 2016, Rio de Janeiro city, Brazil.**

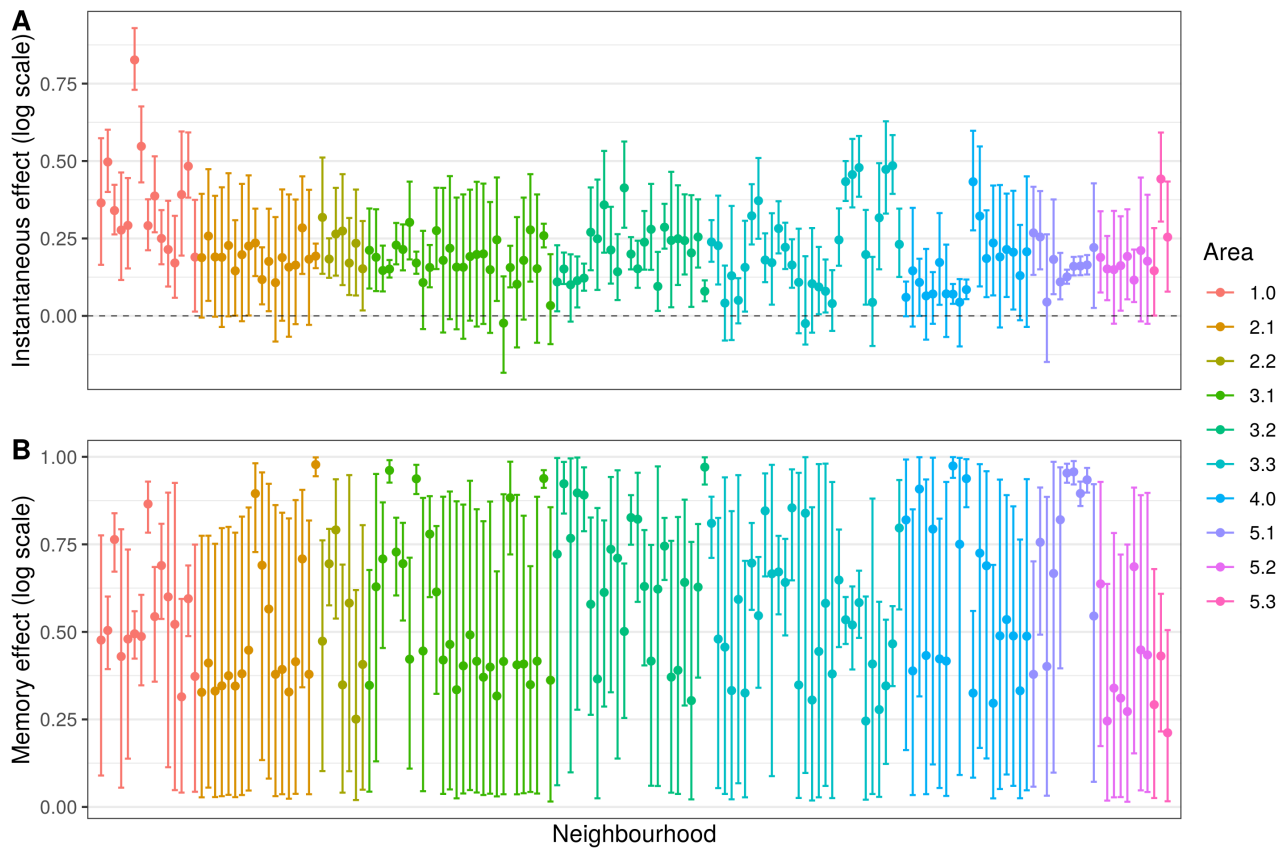

262 When we combine the instantaneous and the memory effects in the impulse response  
263 function, we observed three patterns, exemplified with 9 selected neighbourhoods in Figure 8: null  
264 effect (Figure 8 first row), rapid decay of the effect (second row), and slow decay of the effect (third  
265 row). The impulse response functions for all neighbourhoods are available in the Supplementary  
266 Material Figure 3.

267 The impulse response function is represented in time and space in Video 1. The first frame  
268 represents the mean temperature instantaneous relative risk, the impulse, and the following frames  
269 represent the propagation of this impulse on subsequent weeks. When the temperature relative risk  
270 is null (90% credible interval includes the 1), the neighbourhood is depicted blank. The strong

271 memory effect in some neighbourhoods (Figure 7B) is observed in Video 1 by the persistence of the  
272 temperature effect for several weeks after the impulse, although such effect declines to values very  
273 close to 1. These neighbourhoods were concentrated in areas 1.0, 2.2, mainland 3.1, 3.2, 3.3 and  
274 5.1.

275 **Figure 8. Impulse response function of the minimum temperature effect on chikungunya cases**  
276 **over time, posterior mean and 90% credible interval, in selected neighbourhoods, Rio de**  
277 **Janeiro city, Brazil.**

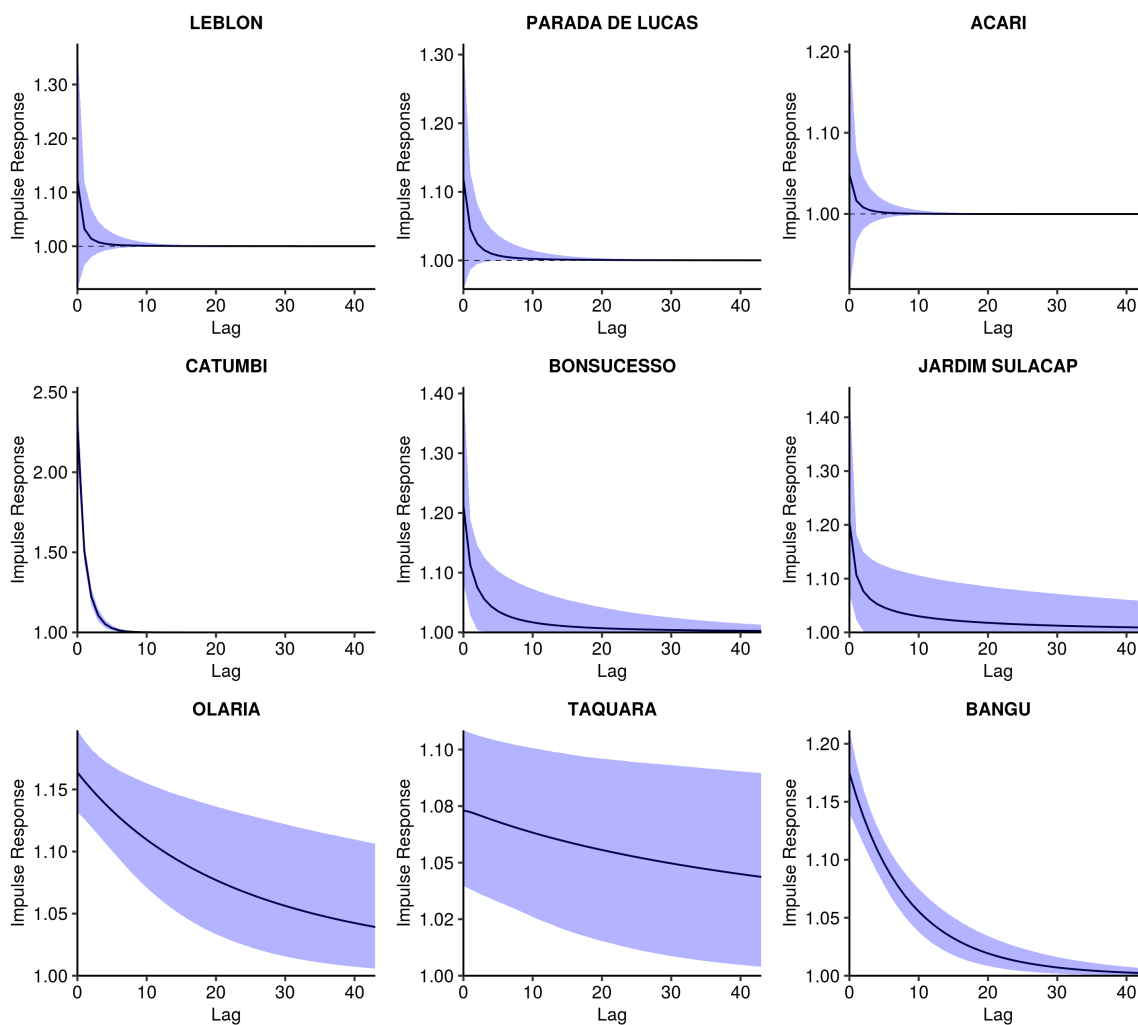

279 **Video 1. Minimum temperature instantaneous effect on chikungunya cases and its**  
280 **propagation in time by neighbourhood, Rio de Janeiro city, Brazil.**

281



282 The estimated relative risk increased rapidly in the first weeks, peaking at week 17 and then  
283 decaying progressively (Video 2 and Figure 9). The decrease in the relative risk coincided with the  
284 decrease in the minimum temperature in the city (Figure 4D). High relative risks for chikungunya  
285 were mostly observed in areas 1.0, 2.2, 3.1, 3.2, 3.3 and 5.1. The neighbourhoods of the remaining  
286 areas presented relative risks below 1 for almost the entire study period. The relative risks with the  
287 credible interval are available in the Supplementary Material Figure 4.

288 **Figure 9. Posterior chikungunya relative risk by neighbourhood in selected weeks, Rio de**  
289 **Janeiro city, Brazil.**

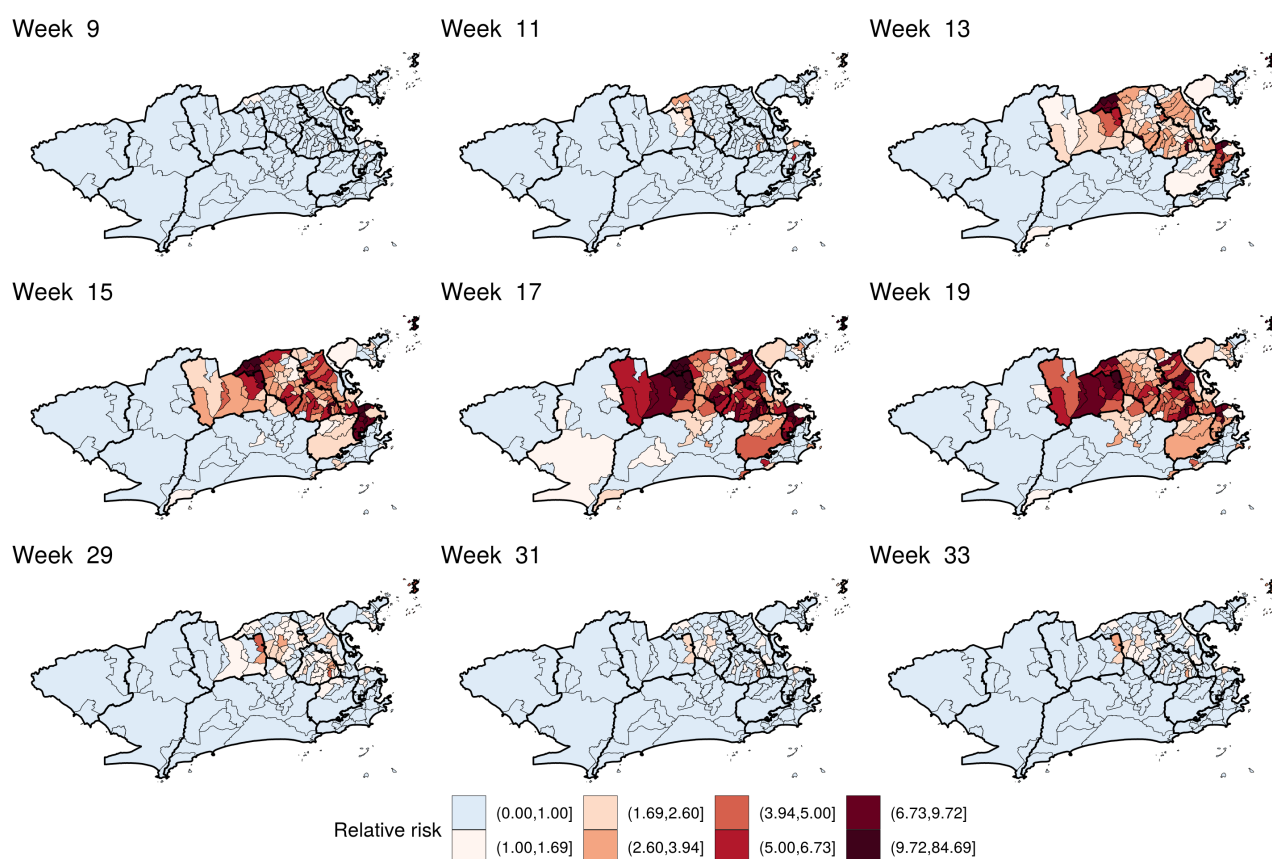

291 **Video 2. Posterior chikungunya relative risk by neighbourhood, weeks 9 to 52 2016, Rio de**  
292 **Janeiro city, Brazil.**

293

294

## 295 Discussion

296 In this study, we present spatio-temporal models fitted to estimate the distribution of the first  
297 chikungunya epidemic in Rio de Janeiro city using as covariates factors that are indirectly related to  
298 the main necessary elements of an arboviral epidemic (Figure 1). The sociodevelopment index and  
299 the proportion of green area were included in the model with time-varying coefficients, which  
300 allowed us to explore how the effects of these factors changed with the progression of the epidemic.  
301 The temperature was included in the model using a transfer function, allowing for a memory effect  
302 that propagates in time, in addition to the instantaneous effect. To our knowledge, this is the first  
303 time a transfer function is applied for temperature when modelling arboviral diseases.

304 We consistently found the sociodevelopment index inversely associated with the risk of  
305 chikungunya in all models (Figure 5A). This index is composed of sanitary conditions indicators,  
306 among others, and poor sanitary conditions are known to favour the reproduction of the *Ae. aegypti*  
307 mosquitoes. The association of low socioeconomic locations with increased risk of chikungunya  
308 was also found in a study in French Guiana (Bonifay et al., 2017) and in a study in Barraquilla, a  
309 Colombian city (McHale et al., 2019). Our results indicate that poor neighbourhoods were the first  
310 ones to be affected by the chikungunya epidemic. In the event that another new arbovirus enters the  
311 city, this could also be the case, highlighting the importance of vector control activities in these  
312 locations.

313 When the spatial dependency was not considered (Model 1), the green area proportion had a  
314 negative association with the number of chikungunya cases (Figure 5). Such association was  
315 observed for dengue in São Paulo, where low vegetation cover areas presented higher dengue  
316 incidence rates (Teixeira and Cruz, 2011). However, with the inclusion of the spatial component  
317 (Models 2 and 4) the effect of the green area proportion moved towards null. This is possible due to  
318 spatial confounding, which happens when covariates that are spatially smooth are collinear with  
319 spatial random effects (Clayton et al., 1993).

320 The temperature was important for most neighbourhoods, increasing the risk of chikungunya.  
321 In our models, we assumed that the temperature has an instantaneous effect and that a proportion of  
322 this effect propagates in time (the memory effect). The instantaneous one represents the effect of the  
323 temperature on the activity of the mosquito and human behaviour. The biting rate of the *Ae. aegypti*  
324 increases with the temperature until around 35 °C (Mordecai et al., 2017), while people become  
325 more exposed to mosquitoes in warm temperatures. The temperature also accelerates the extrinsic  
326 incubation period of the virus in the mosquito, and transmission was estimated to peak around 28.5  
327 °C (Mordecai et al., 2017). On the other hand, the temperature effect on the population of  
328 mosquitoes by increasing fecundity, egg-to-adult-survival, development rate and lifespan, is not  
329 only on the same week but also accumulates in time, which is captured by the memory effect. It is  
330 important to note that for each of these elements of the mosquito ecology the temperature effect is  
331 not linear, but reaches a peak and then starts decreasing. For example, the biting rate decreases in  
332 temperatures above 35 °C (Mordecai et al., 2017).

333 Interestingly, the CHIKV epidemic in Rio de Janeiro in 2016 did not reach the whole city,  
334 with high-risk areas mostly concentrated in the North and Downtown regions. The decrease in the  
335 number of cases coincided with the decrease in the minimum temperature, around week 17 (Figures  
336 3A and 4D). These two observations combined suggest that the epidemic was interrupted not  
337 because of the depletion of the susceptible human population, but because the decrease in the  
338 temperature caused a reduction in the transmission in such a way that the epidemic was not  
339 sustained. It is important to note that although the number of cases diminished substantially, there  
340 were still chikungunya cases being reported until the end of the year. Rio de Janeiro is a tropical  
341 city and the minimum temperature rarely is below the minimum temperature needed for  
342 transmission to occur, of 13.5 °C (Mordecai et al., 2017). A previous study conducted in the city  
343 showed that the *Ae. aegypti* population varies seasonally, but the mosquito is present all over the

344 year (Honório et al., 2009b). This could explain the long persistence of the temperature effect in  
345 time in some neighbourhoods (Video 1).

346 Spatial models are important and useful to identify high-risk areas for diseases. The  
347 application of such models considering intra-urban scenarios is still growing for arboviral diseases.  
348 Our study identified high-risk neighbourhoods for chikungunya first epidemic in Rio de Janeiro  
349 city, which concentrated mostly in the North and Downtown regions (Figure 9 and Video 2). Such  
350 regions were already identified as high-risk locations for dengue (Xavier et al., 2017). In our  
351 previous study, neighbourhoods from these regions were more likely to constitute simultaneous  
352 clusters for dengue, Zika and chikungunya (Freitas et al., 2019). These regions have a combination  
353 of factors that favours the *Ae. aegypti* ecology and the transmission of arboviral diseases: low  
354 vegetation, low socioeconomic status and increased temperature (Figure 4). Vector control activities  
355 should be prioritized and intensified in the identified high-risk areas, as they appear to be the first  
356 ones affected by the epidemic. Also, the long-term persistence of the temperature effect (Video 1)  
357 and of a small number of cases even after the decline of the epidemic indicate that the mosquito  
358 continues to circulate and transmit the disease throughout the year, meaning interventions should be  
359 continuous in these locations.

360 Our study has some limitations. As for any study using secondary data on arboviral diseases,  
361 there is an uncertainty on the diagnosis of the reported cases as well as underreporting. It is  
362 important to consider that in the same year the city was also experiencing dengue and Zika  
363 epidemics (Freitas et al., 2019). Because of the association between Zika and severe congenital  
364 manifestations, the disease awareness around Zika may have improved the reporting rates (Lowe et  
365 al., 2018a). However, the simultaneous occurrence of three arbovirus epidemics may have impaired  
366 the differential diagnosis, as they cause similar symptoms. We analysed the data aggregated at the  
367 neighbourhood level as the data are more reliable at this spatial unit, but smaller areas inside the  
368 same neighbourhood can present different socioeconomic and environmental characteristics. Finer

369 scales such as census tracts should be considered in future studies. Finally, an important limitation  
370 is the assumption that the chikungunya risk is related to the neighbourhood of residence, while  
371 some people may get infected in other locations.

372 The model here presented has the potential to be applied to other cities and other urban  
373 arboviral diseases. However, this may depend on the climate of the city. If the temperature presents  
374 a wide range of variation and reaches values that can either boost or impair transmission, a time-  
375 varying instantaneous effect for the temperature should be explored (Alves et al., 2010). Mosquito  
376 population information is expensive to collect and often unreliable. Therefore not depending on  
377 such data is a strength of our model. By using temperature, socioeconomic and green area data as  
378 proxies of the key elements of arboviruses transmission, our model contributed to better understand  
379 the spatio-temporal dynamics of the first chikungunya epidemic in a tropical metropolitan city.

380

## 381 **Acknowledgements**

382 The authors would like to thank the Municipal Secretariat of Health for providing the data on  
383 reported cases, and the meteorological and environmental institutes – INMET, DECEA, INEA,  
384 SMAC and Alerta Rio, for making their meteorological data publicly available.

385

## 386 **Competing interests**

387 We declare we have no competing interests.

388

## 389 **Funding**

390 This study was financed in part by the Coordenação de Aperfeiçoamento de Pessoal de Nível  
391 Superior - Brasil (CAPES) - Finance Code 001, to LPF. LPF received funds from the Emerging  
392 Leaders in the Americas Program (ELAP), Government of Canada. AMS acknowledges the support  
393 of the Natural Sciences and Engineering Research Council (NSERC) of Canada (RGPIN-2017-

394 04999). MSC received grants from Fundação Carlos Chagas Filho de Amparo à Pesquisa do Estado  
395 do Rio de Janeiro (FAPERJ, grant nº E\_26/201.356/2014) and support from Conselho Nacional de  
396 Desenvolvimento Científico e Tecnológico (CNPq, grant nº 304101/2017-6). The funders did not  
397 influence the content of this manuscript nor the decision to submit it for publication.

398

## 399 **References**

Alves MB, Gamerman D, Ferreira MA. 2010. Transfer functions in dynamic generalized linear models. *Statistical Modelling: An International Journal* **10**:03–40. doi:10.1177/1471082X0801000102

Besag J. 1974. Spatial Interaction and the Statistical Analysis of Lattice Systems. *Journal of the Royal Statistical Society Series B (Methodological)* **36**:192–236.

Bonifay T, Douine M, Bonnefoy C, Hurpeau B, Nacher M, Djossou F, Epelboin L. 2017. Poverty and Arbovirus Outbreaks: When Chikungunya Virus Hits More Precarious Populations Than Dengue Virus in French Guiana. *Open Forum Infectious Diseases* **4**. doi:10.1093/ofid/ofx247

Carpenter B, Gelman A, Hoffman MD, Lee D, Goodrich B, Betancourt M, Brubaker M, Guo J, Li P, Riddell A. 2017. *Stan*: A Probabilistic Programming Language. *Journal of Statistical Software* **76**. doi:10.18637/jss.v076.i01

Carvalho MS, Freitas LP, Cruz OG, Brasil P, Bastos LS. 2020. Association of past dengue fever epidemics with the risk of Zika microcephaly at the population level in Brazil. *Scientific Reports* **10**. doi:10.1038/s41598-020-58407-7

Carvalho MS, Honorio NA, Garcia LMT, Carvalho LC de S. 2017. *Aedes aegypti* control in urban areas: A systemic approach to a complex dynamic. *PLOS Neglected Tropical Diseases* **11**:e0005632. doi:10.1371/journal.pntd.0005632

- Cavallieri F, Vial A. 2012. Favelas na cidade do Rio de Janeiro: o quadro populacional com base no Censo 2010 (No. 20120501), Coleção Estudos Cariocas. Rio de Janeiro, RJ: Instituto Pereira Passos.
- Clayton DG, Bernardinelli L, Montomoli C. 1993. Spatial Correlation in Ecological Analysis. *International Journal of Epidemiology* **22**:1193–1202. doi:10.1093/ije/22.6.1193
- de Souza T, Ribeiro E, Corrêa V, Damasco P, Santos C, de Bruycker-Nogueira F, Chouin-Carneiro T, Faria N, Nunes P, Heringer M, Lima M, Badolato-Corrêa J, Cipitelli M, Azeredo E, Nogueira R, dos Santos F. 2018. Following in the Footsteps of the Chikungunya Virus in Brazil: The First Autochthonous Cases in Amapá in 2014 and Its Emergence in Rio de Janeiro during 2016. *Viruses* **10**:623. doi:10.3390/v10110623
- DECEA. n.d. REDEMETS - Painel de consulta. *Rede de Meteorologia do Comando da Aeronáutica*. <https://www.redemet.aer.mil.br/?i=produtos&p=consulta-de-mensagens-opmet>
- Diggle P, Ribeiro PJ. 2007. Model-based Geostatistics, Springer Series in Statistics. New York: Springer-Verlag. doi:10.1007/978-0-387-48536-2
- Freitas LP, Cruz OG, Lowe R, Sá Carvalho M. 2019. Space-time dynamics of a triple epidemic: dengue, chikungunya and Zika clusters in the city of Rio de Janeiro. *Proceedings of the Royal Society B: Biological Sciences* **286**:20191867. doi:10.1098/rspb.2019.1867
- Gelman A, Rubin DB. 1992. Inference from Iterative Simulation Using Multiple Sequences. *Statistical Science* **7**:457–472. doi:10.1214/ss/1177011136
- Gomes AF, Nobre AA, Cruz OG. 2012. Temporal analysis of the relationship between dengue and meteorological variables in the city of Rio de Janeiro, Brazil, 2001-2009. *Cadernos de Saúde Pública* **28**:2189–2197. doi:10.1590/S0102-311X2012001100018
- Guo J, Gabry J, Goodrich B, Lee D, Sakrejs K, Martin M, University T of C, Sklyar (R/cxxfunplus.R) O, Team (R/pairs.R TRC, R/dynGet.R), Oehlschlaegel-Akiyoshi (R/pairs.R) J. 2019. rstan: R Interface to Stan.

- Honório NA, Castro MG, Barros FSM de, Magalhães M de AFM, Sabroza PC. 2009a. The spatial distribution of *Aedes aegypti* and *Aedes albopictus* in a transition zone, Rio de Janeiro, Brazil. *Cadernos de Saúde Pública* **25**:1203–1214. doi:10.1590/S0102-311X2009000600003
- Honório NA, Codeço CT, Alves FC, Magalhães M de AFM, Lourenço-de-Oliveira R. 2009b. Temporal Distribution of *Aedes aegypti* in Different Districts of Rio De Janeiro, Brazil, Measured by Two Types of Traps. *Journal of Medical Entomology* **46**:1001–1014. doi:10.1603/033.046.0505
- Honório NA, Nogueira RMR, Codeço CT, Carvalho MS, Cruz OG, Magalhães M de AFM, de Araújo JMG, de Araújo ESM, Gomes MQ, Pinheiro LS, da Silva Pinel C, Lourenço-de-Oliveira R. 2009c. Spatial Evaluation and Modeling of Dengue Seroprevalence and Vector Density in Rio de Janeiro, Brazil. *PLoS Neglected Tropical Diseases* **3**:e545. doi:10.1371/journal.pntd.0000545
- INEA. n.d. Dados do Monitoramento da Qualidade do Ar e Meteorologia. *Instituto Estadual do Ambiente Rio de Janeiro*. <http://200.20.53.25/qualiar/home/index>
- INMET. n.d. Estações Automáticas. *INMET - Instituto Nacional de Meteorologia*. <http://www.inmet.gov.br/portal/index.php?r=estacoes/estacoesAutomaticas>
- Kuno G. 1995. Review of the Factors Modulating Dengue Transmission. *Epidemiologic Reviews* **17**:321–335. doi:10.1093/oxfordjournals.epirev.a036196
- Lowe R, Bailey TC, Stephenson DB, Graham RJ, Coelho CAS, Sá Carvalho M, Barcellos C. 2011. Spatio-temporal modelling of climate-sensitive disease risk: Towards an early warning system for dengue in Brazil. *Computers & Geosciences* **37**:371–381. doi:10.1016/j.cageo.2010.01.008



- Lowe R, Barcellos C, Brasil P, Cruz OG, Honório NA, Kuper H, Carvalho MS. 2018a. The Zika Virus Epidemic in Brazil: From Discovery to Future Implications. *International Journal of Environmental Research and Public Health* **15**:96. doi:10.3390/ijerph15010096
- Lowe R, Gasparrini A, Van Meerbeeck CJ, Lippi CA, Mahon R, Trotman AR, Rollock L, Hinds AQJ, Ryan SJ, Stewart-Ibarra AM. 2018b. Nonlinear and delayed impacts of climate on dengue risk in Barbados: A modelling study. *PLOS Medicine* **15**:e1002613. doi:10.1371/journal.pmed.1002613
- Lowe R, Stewart-Ibarra AM, Petrova D, García-Díez M, Borbor-Cordova MJ, Mejía R, Regato M, Rodó X. 2017. Climate services for health: predicting the evolution of the 2016 dengue season in Machala, Ecuador. *The Lancet Planetary Health* **1**:e142–e151. doi:10.1016/S2542-5196(17)30064-5
- Martínez-Bello D, López-Quílez A, Torres Prieto A. 2018. Spatio-Temporal Modeling of Zika and Dengue Infections within Colombia. *International Journal of Environmental Research and Public Health* **15**:1376. doi:10.3390/ijerph15071376
- Martínez-Bello DA, López-Quílez A, Torres Prieto A. 2017. Relative risk estimation of dengue disease at small spatial scale. *International Journal of Health Geographics* **16**. doi:10.1186/s12942-017-0104-x
- McHale TC, Romero-Vivas CM, Fronterre C, Arango-Padilla P, Waterlow NR, Nix CD, Falconar AK, Cano J. 2019. Spatiotemporal Heterogeneity in the Distribution of Chikungunya and Zika Virus Case Incidences during their 2014 to 2016 Epidemics in Barranquilla, Colombia. *International Journal of Environmental Research and Public Health* **16**:1759. doi:10.3390/ijerph16101759
- Ministério da Saúde. 2017. Chikungunya: manejo clínico. Brasília, DF.
- Mordecai EA, Cohen JM, Evans MV, Gudapati P, Johnson LR, Lippi CA, Miazgowicz K, Murdock CC, Rohr JR, Ryan SJ, Savage V, Shocket MS, Stewart Ibarra A, Thomas MB, Weikel DP.

2017. Detecting the impact of temperature on transmission of Zika, dengue, and chikungunya using mechanistic models. *PLOS Neglected Tropical Diseases* **11**:e0005568. doi:10.1371/journal.pntd.0005568

Morris M, Wheeler-Martin K, Simpson D, Mooney SJ, Gelman A, DiMaggio C. 2019. Bayesian hierarchical spatial models: Implementing the Besag York Mollié model in stan. *Spatial and Spatio-temporal Epidemiology* **31**:100301. doi:10.1016/j.sste.2019.100301

Nogueira RMR, Miagostovich MP, Schatzmayr HG, Santos FB dos, Araújo ESM de, Filippis AMB de, Souza RV de, Zagne SMO, Nicolai C, Baran M, Teixeira Filho G. 1999. Dengue in the State of Rio de Janeiro, Brazil, 1986-1998. *Memórias do Instituto Oswaldo Cruz* **94**:297–304. doi:10.1590/S0074-02761999000300004

Pebesma E, Bivand R, Racine E, Sumner M, Cook I, Keitt T, Lovelace R, Wickham H, Ooms J, Müller K, Pedersen TL. 2019. sf: Simple Features for R.

Prefeitura do Rio de Janeiro. 2019a. População residente, por idade e por grupos de idade, segundo as Áreas de Planejamento (AP), Regiões Administrativas (RA) e Bairros em 2000/2010. *Data Rio*. <http://www.data.rio/datasets/e68e54eaa6bb484dbb40828acf2b3e7e>

Prefeitura do Rio de Janeiro. 2019b. Índice de Desenvolvimento Social (IDS) por Áreas de Planejamento (AP), Regiões de Planejamento (RP), Regiões Administrativas (RA), Bairros e Favelas do Município do Rio de Janeiro - 2010. *Data Rio*. <http://www.data.rio/datasets/fa85ddc76a524380ad7fc60e3006ee97>

Prefeitura do Rio de Janeiro. 2019c. Uso do Solo 2015. *Data Rio*. [http://www.data.rio/datasets/e74a94ac95d440d19b3e18c23bc485de\\_6](http://www.data.rio/datasets/e74a94ac95d440d19b3e18c23bc485de_6)

Prefeitura do Rio de Janeiro. n.d. Rio em Síntese. *Data Rio*. <http://www.data.rio/pages/rio-em-sntese-2>

Prefeitura do Rio de Janeiro. n.d. Dados Meteorológicos. *Sistema Alerta Rio*. <http://alertario.rio.rj.gov.br/download/dados-meteorologicos/>

Prefeitura do Rio de Janeiro, Secretaria Municipal de Saúde. 2016. Número de Casos de Chikungunya por Semana Epidemiológica, Áreas de Planejamento, Regiões Administrativas e Bairros - Município do Rio de Janeiro, 2016. <http://www.rio.rj.gov.br/dlstatic/10112/7612791/4213019/CHIKVSE2016.pdf>

QGIS Development Team. 2020. QGIS Geographic Information System. Open Source Geospatial Foundation Project.

Randolph SE, Rogers DJ. 2010. The arrival, establishment and spread of exotic diseases: patterns and predictions. *Nature Reviews Microbiology* **8**:361–371. doi:10.1038/nrmicro2336

Riebler A, Sørbye SH, Simpson D, Rue H. 2016. An intuitive Bayesian spatial model for disease mapping that accounts for scaling: *Statistical Methods in Medical Research*. doi:10.1177/0962280216660421

Ripley BD, Ribeiro PJ, Diggle PJ. 2001. geoR: A Package for Geostatistical Analysis.

Rosa-Freitas MG, Tsouris P, Reis IC, Magalhães M de AFM, Nascimento TFS, Honório NA. 2010. Dengue land cover heterogeneity in Rio de Janeiro. *Oecologia Australis* **14**:641–667. doi:10.4257/oeco.2010.1403.04

Santos JPC dos, Honório NA, Nobre AA. 2019. Definition of persistent areas with increased dengue risk by detecting clusters in populations with differing mobility and immunity in Rio de Janeiro, Brazil. *Cadernos de Saúde Pública* **35**. doi:10.1590/0102-311x00248118

SMAC. n.d. Dados horários do monitoramento da qualidade do ar - MonitorAr. *Data Rio*. <http://www.data.rio/datasets/dados-hor%C3%A1rios-do-monitoramento-da-qualidade-do-ar-monitorar?orderBy=Data>

Stan Development Team. n.d. Stan Reference Manual, Version 2.23. ed.

Teixeira MG, Costa M da CN, Barreto F, Barreto ML. 2009. Dengue: twenty-five years since reemergence in Brazil. *Cadernos de Saúde Pública* **25**:S7–S18. doi:10.1590/S0102-311X2009001300002

Teixeira TR de A, Cruz OG. 2011. Spatial modeling of dengue and socio-environmental indicators in the city of Rio de Janeiro, Brazil. *Cadernos de Saúde Pública* 27:591–602. doi:10.1590/S0102-311X2011000300019

The R Foundation for Statistical Computing. 2020. R. The R Foundation.

Vehtari A, Gelman A, Gabry J. 2017. Practical Bayesian model evaluation using leave-one-out cross-validation and WAIC. *Statistics and Computing* 27:1413–1432. doi:10.1007/s11222-016-9696-4

Watanabe S. 2010. Asymptotic Equivalence of Bayes Cross Validation and Widely Applicable Information Criterion in Singular Learning Theory 24.

WHO. 2017. Chikungunya. *World Health Organization*. <http://www.who.int/news-room/fact-sheets/detail/chikungunya>

Wickham H. 2016. *ggplot2: Elegant Graphics for Data Analysis*. Springer-Verlag.

Wickham H, RStudio. 2017. tidyverse: Easily Install and Load the “Tidyverse.”

World Meteorological Organization, editor. 2007. Guide to the global observing system, 3rd ed. ed, WMO. Geneva: World Meteorological Organization.

Xavier DR, Magalhães M de AFM, Gracie R, Reis IC dos, Matos VP de, Barcellos C. 2017. Difusão espaço-tempo do dengue no Município do Rio de Janeiro, Brasil, no período de 2000-2013. *Cadernos de Saúde Pública* 33. doi:10.1590/0102-311x00186615

## Supplementary Material

**Figure 1. Meteorological weather stations (red dots) in the 500m X 500m grid and neighbourhoods, Rio de Janeiro city, Brazil.**

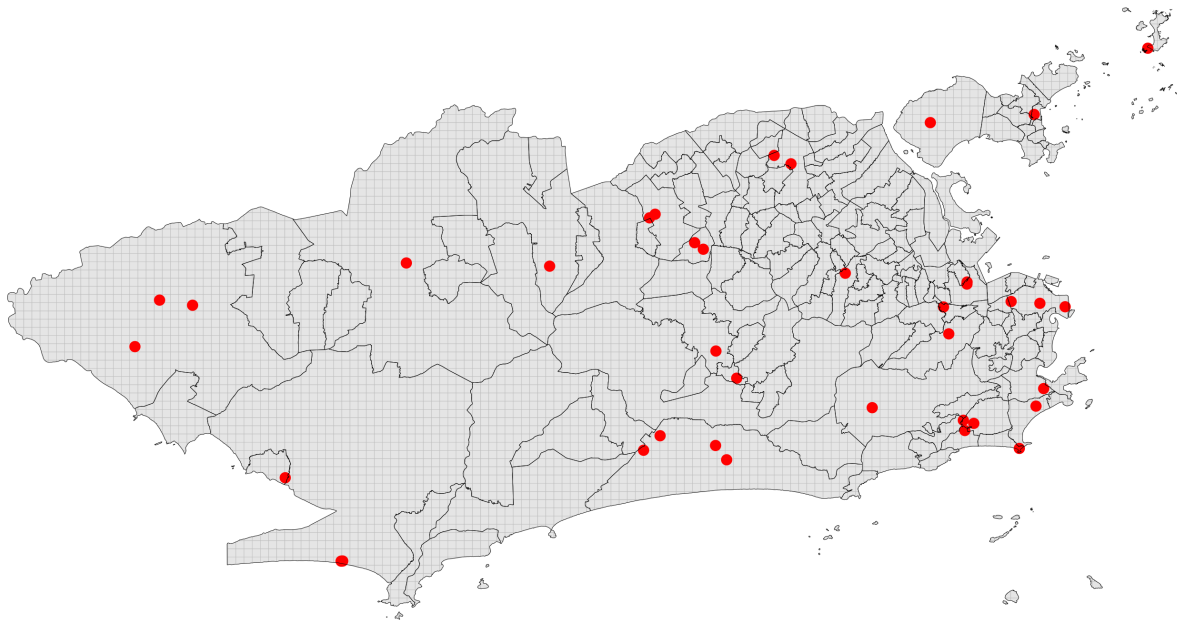

**Figure 2. Correlation between the spatial effects (in the log scale) of Model 0 versus Model 4, by neighbourhood, weeks 9 to 52 2016, Rio de Janeiro city, Brazil.**

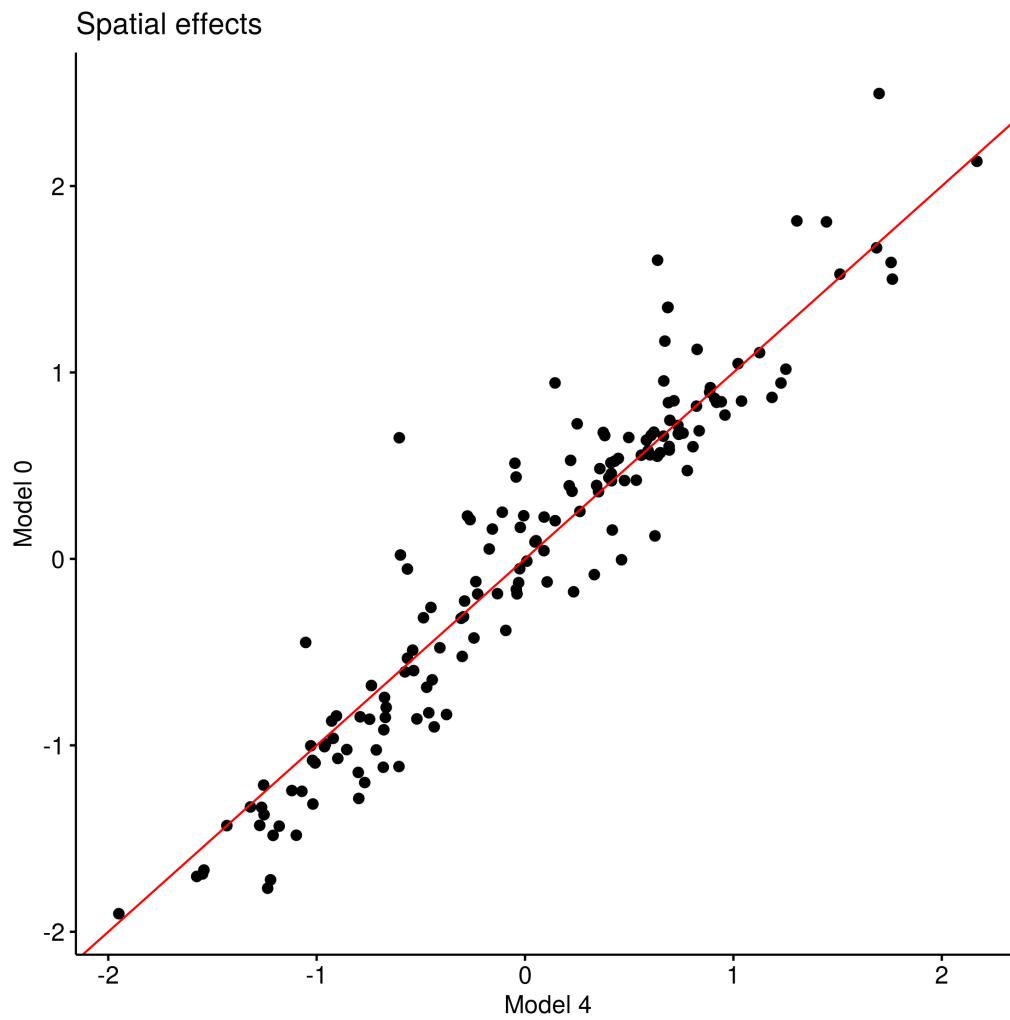

**Figure 3. Impulse response of the minimum temperature, posterior mean and 90% credible interval, by neighbourhood, Rio de Janeiro city, Brazil.**

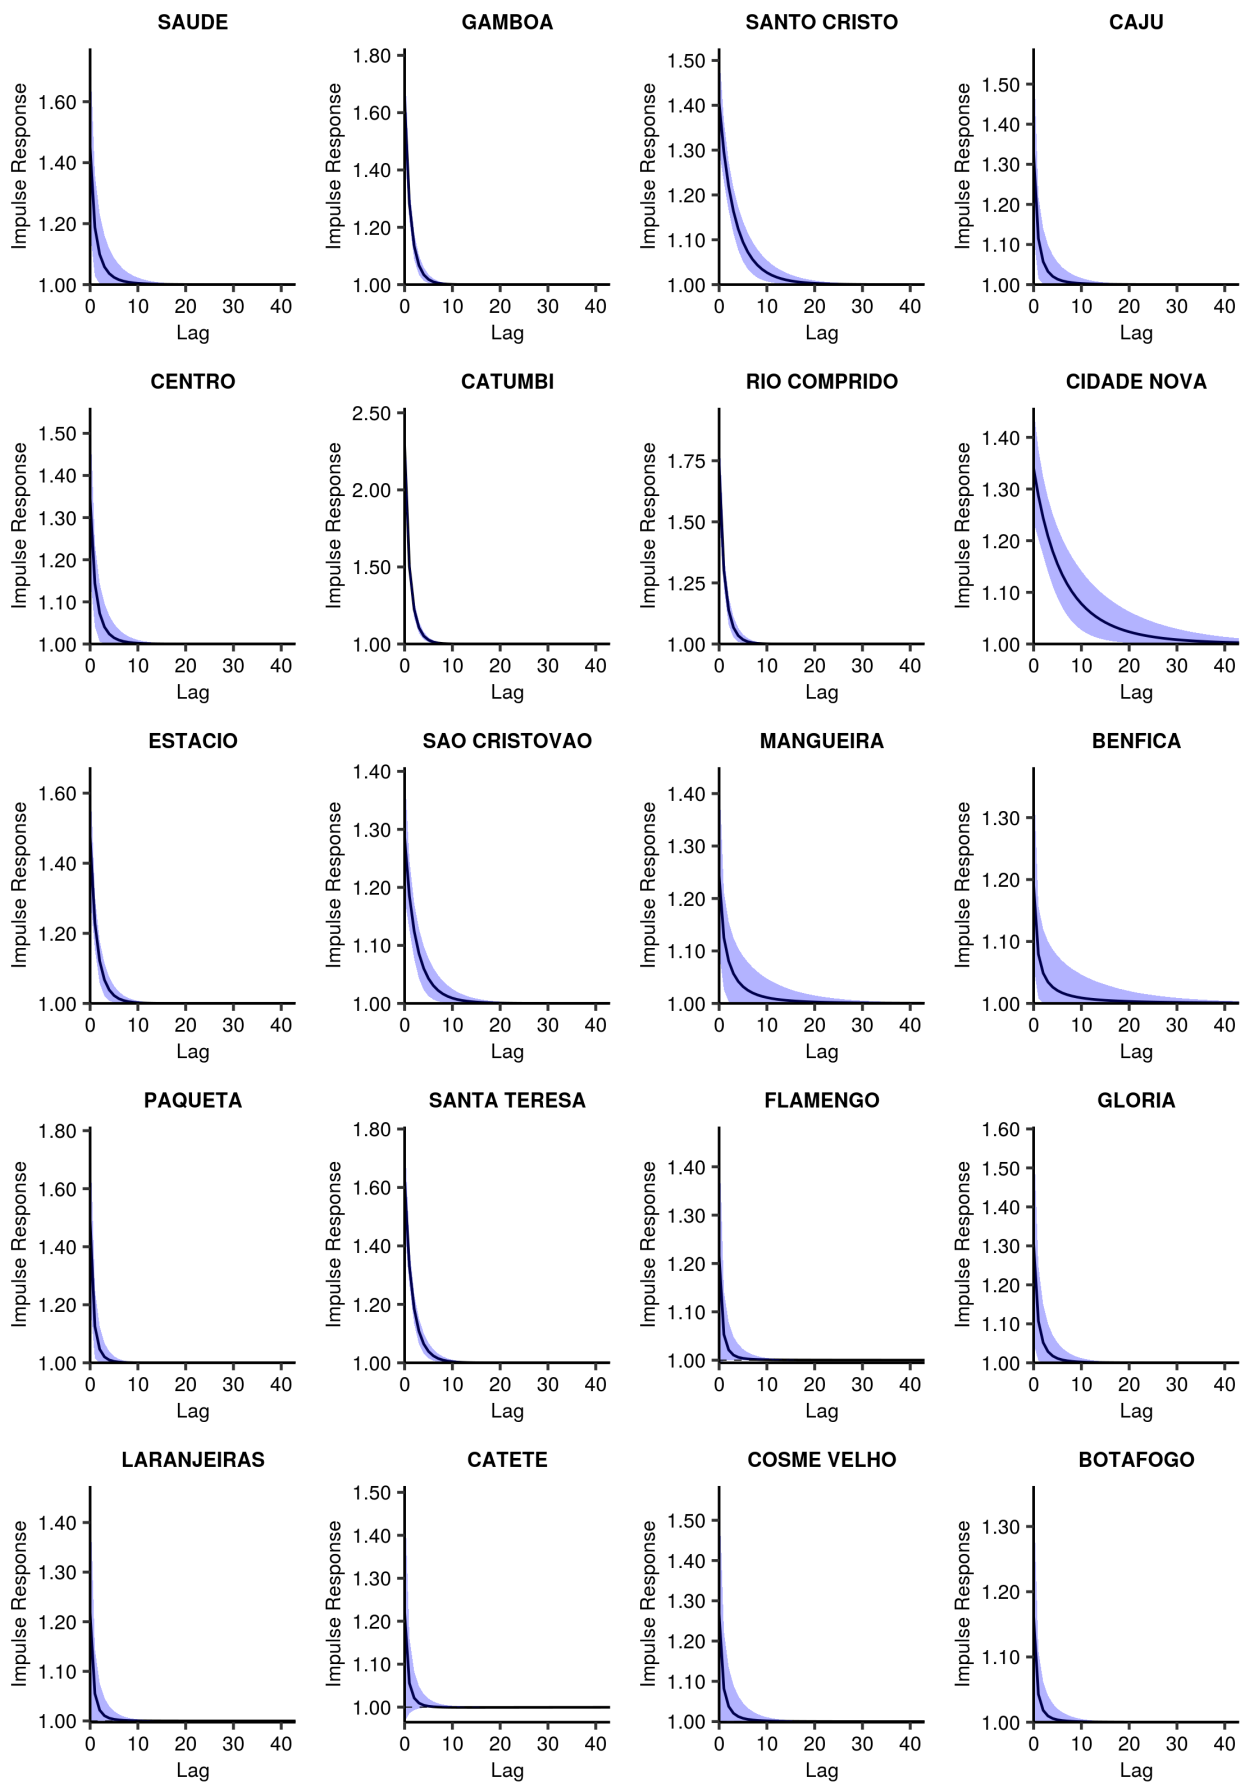

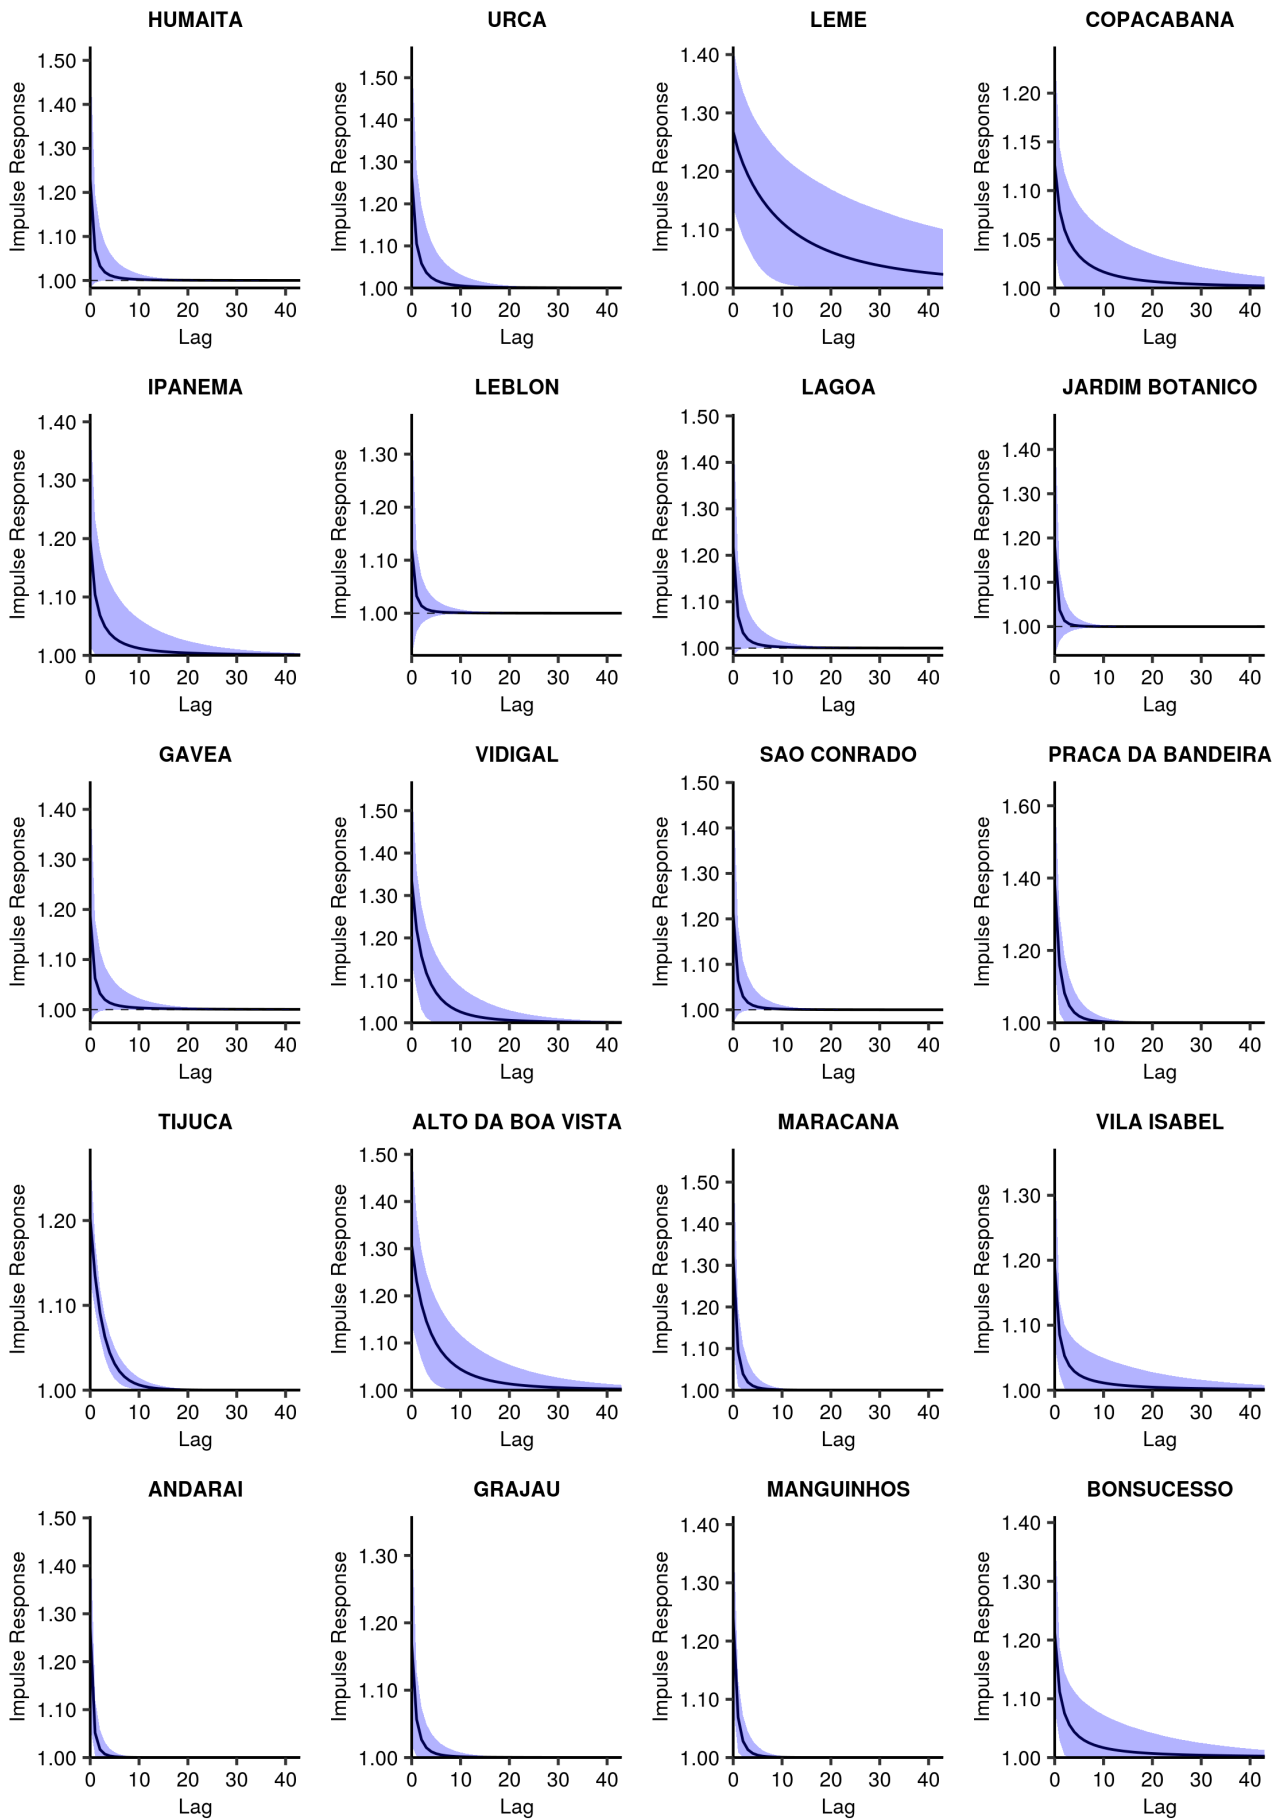



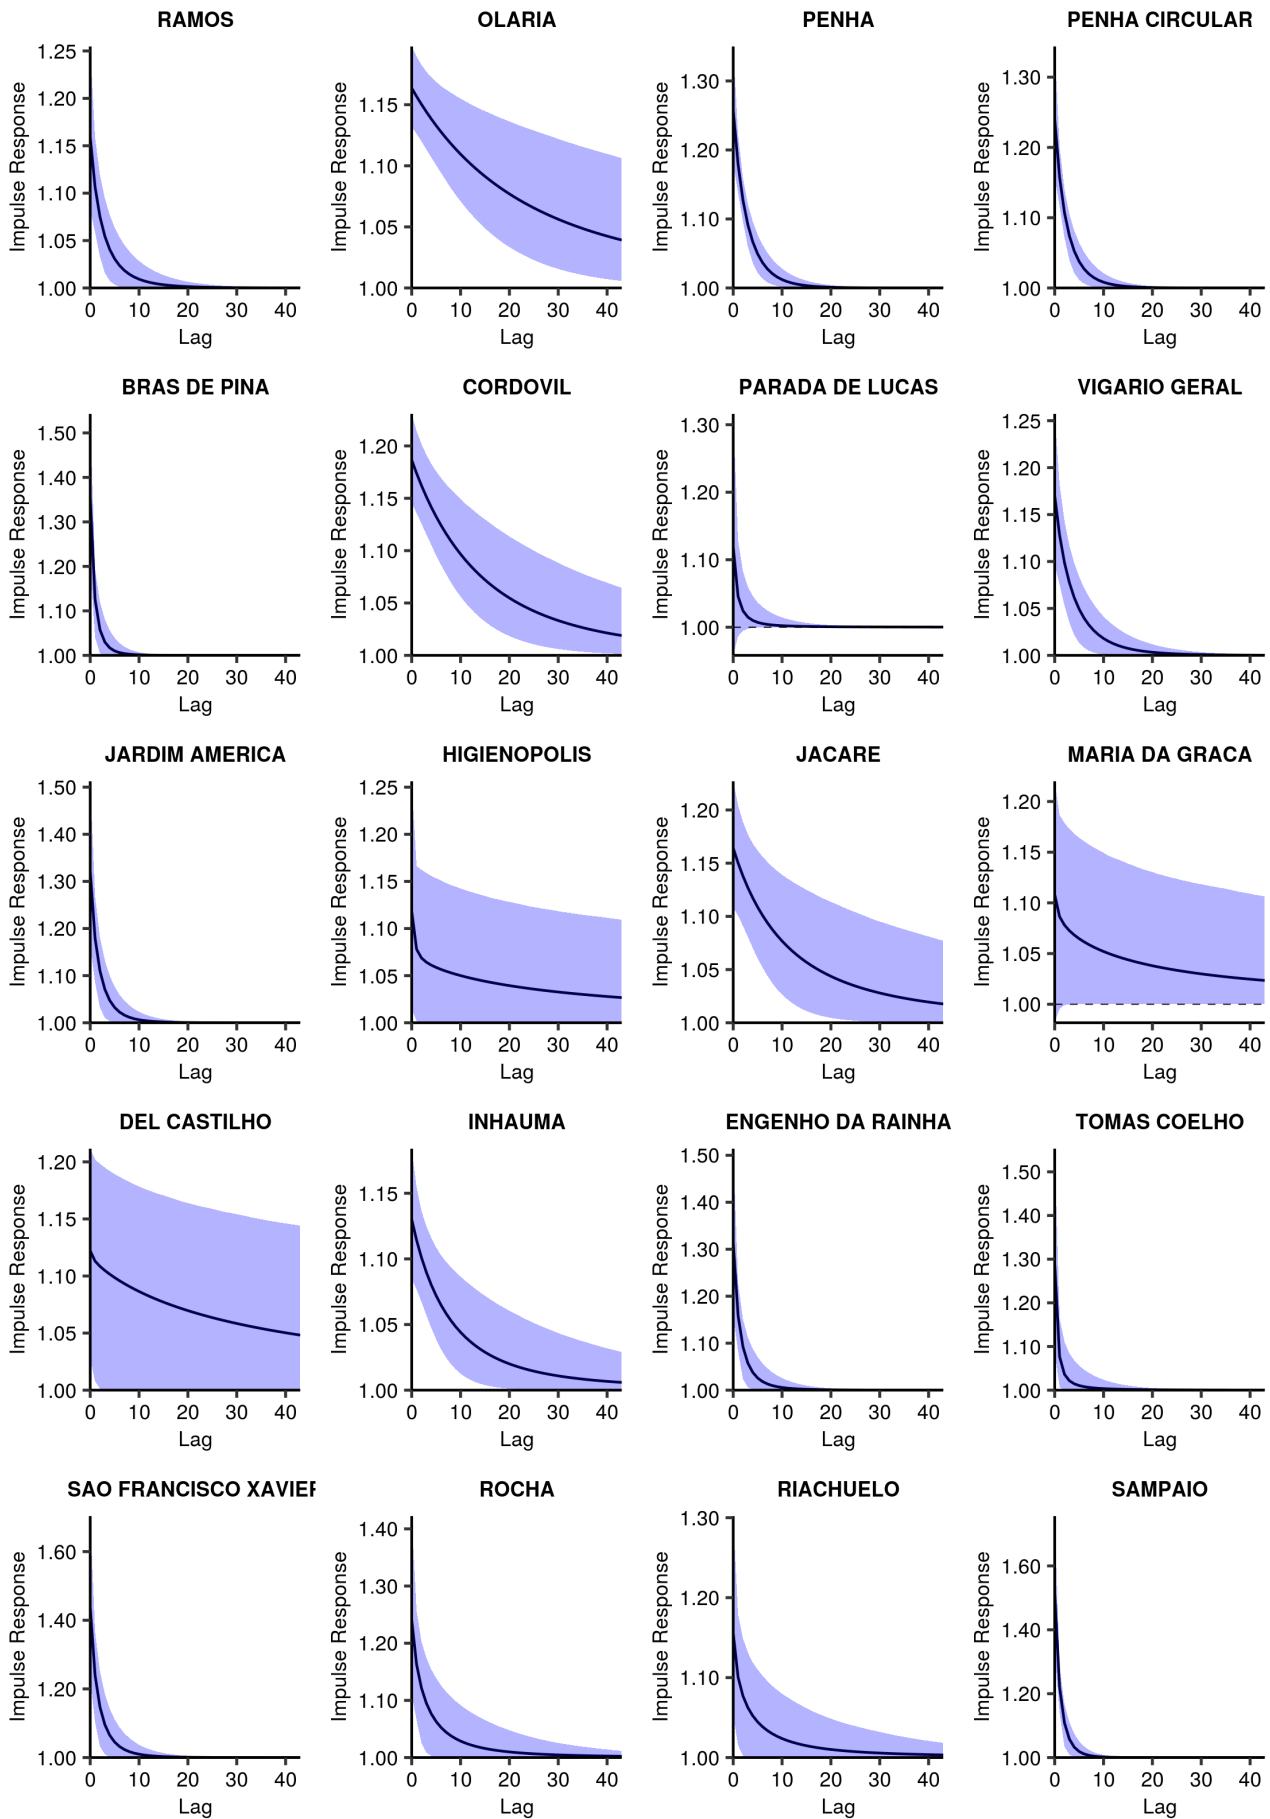

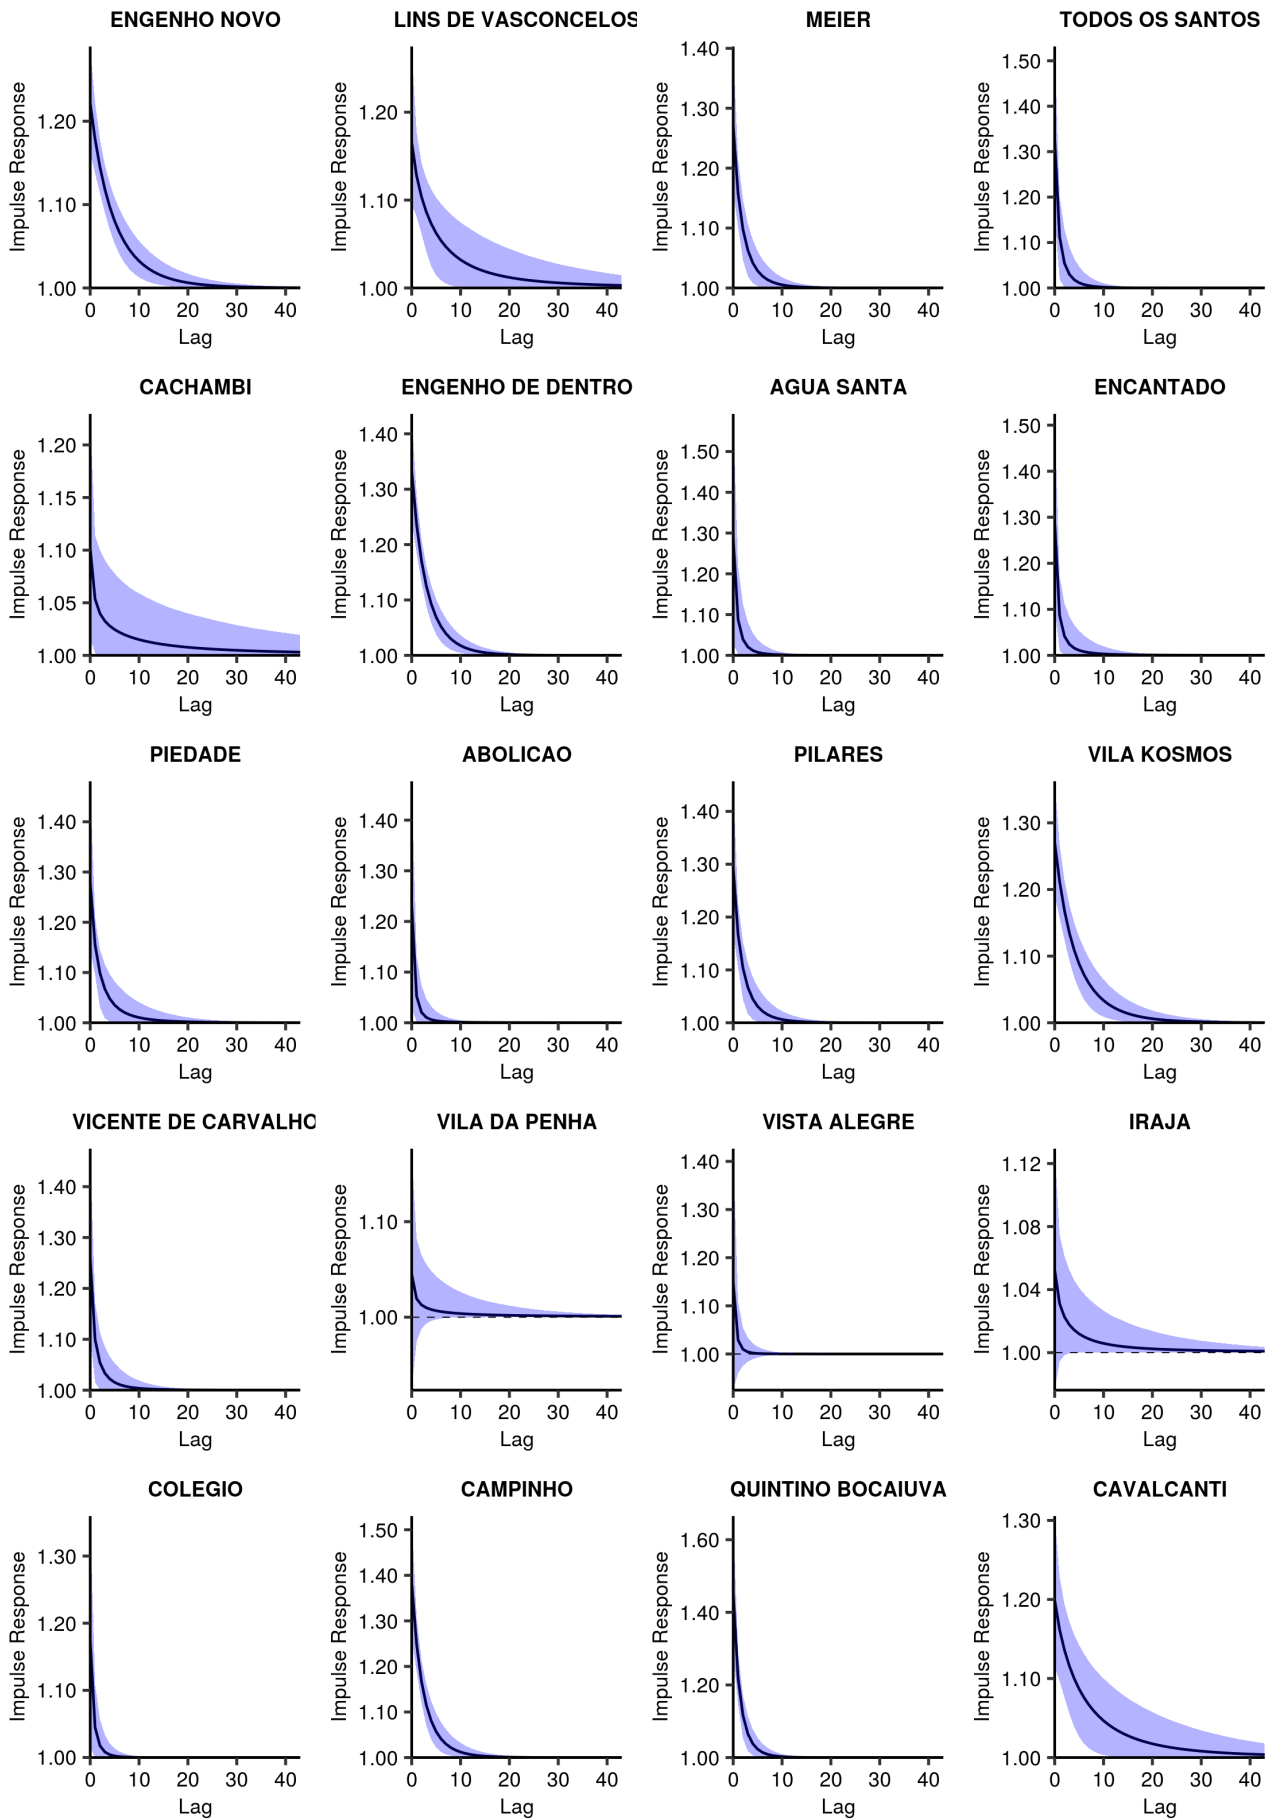

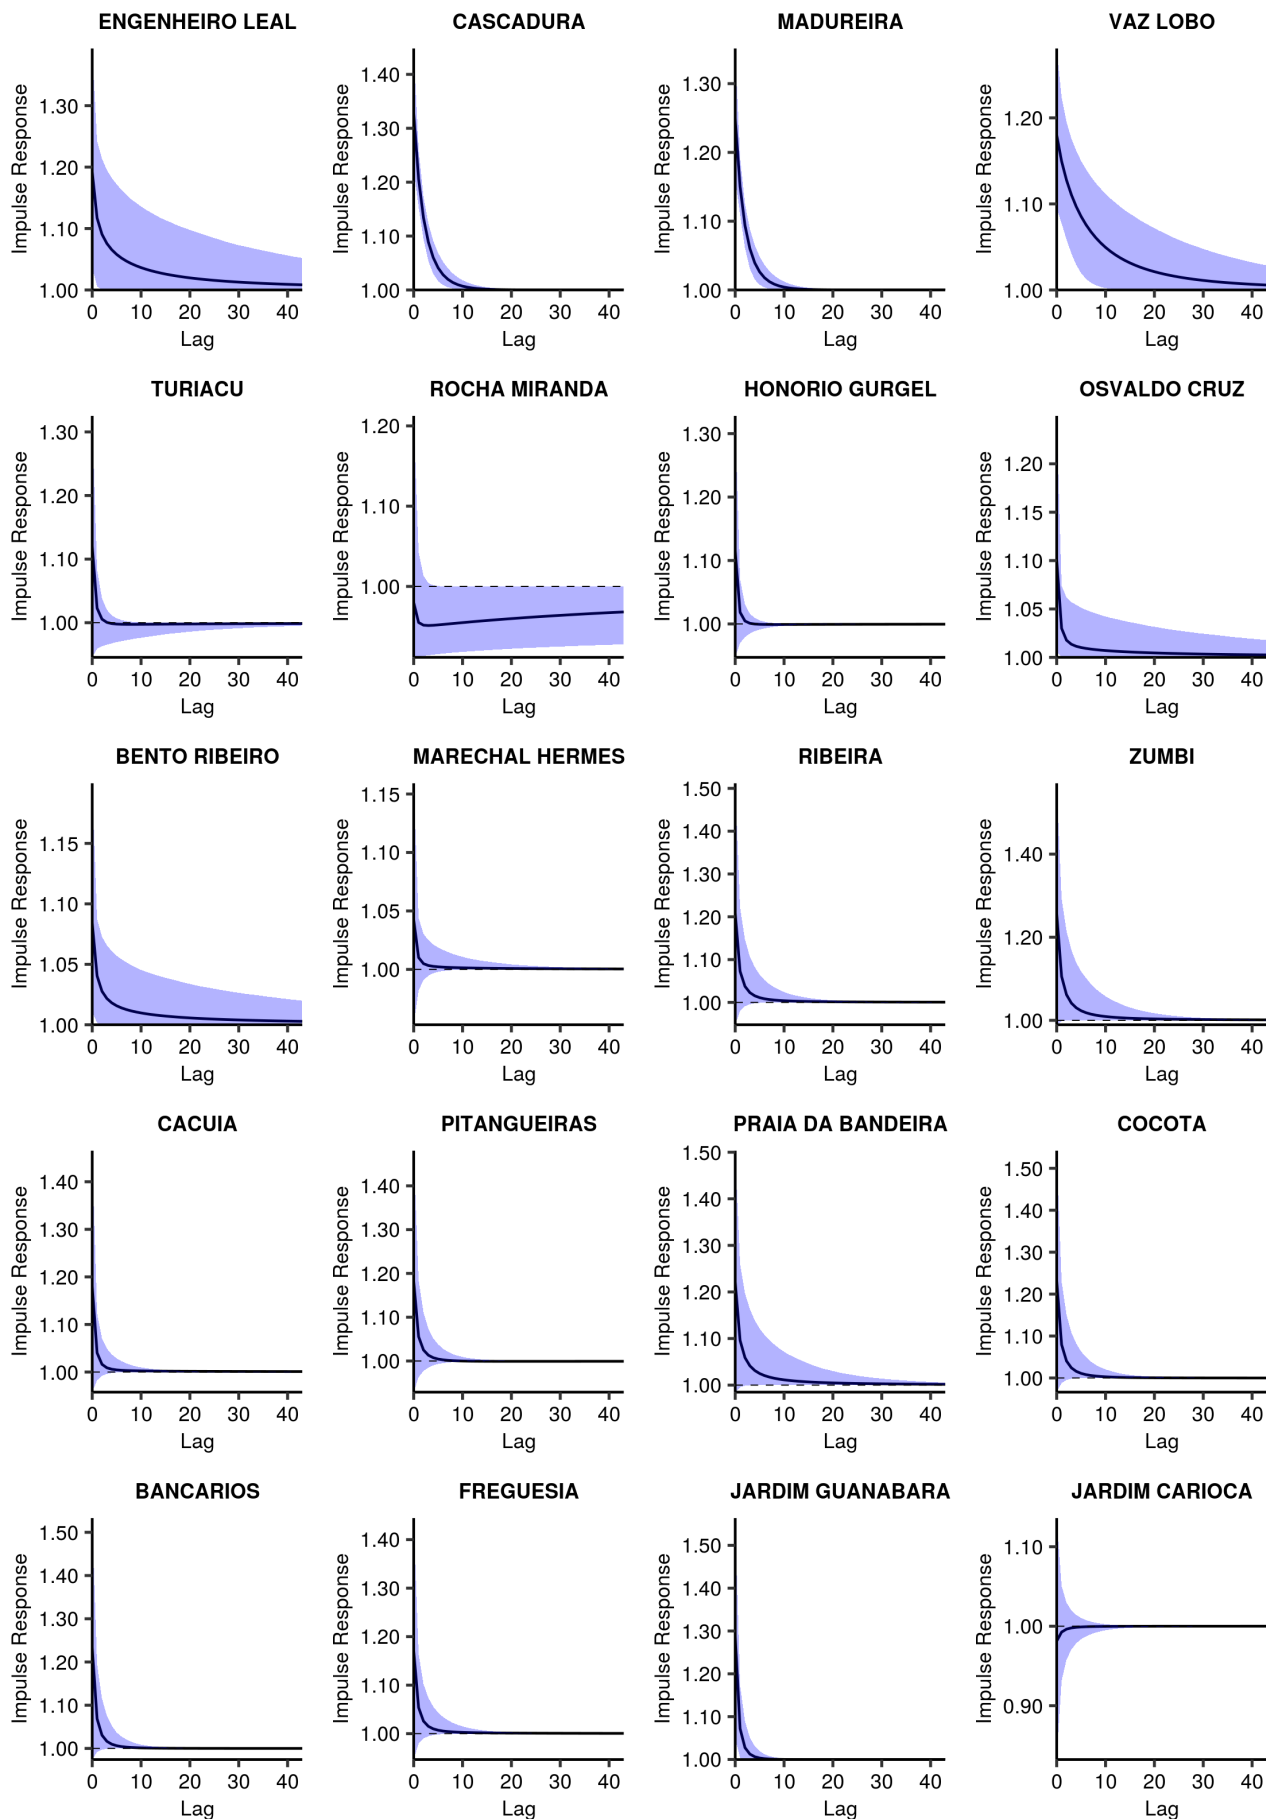

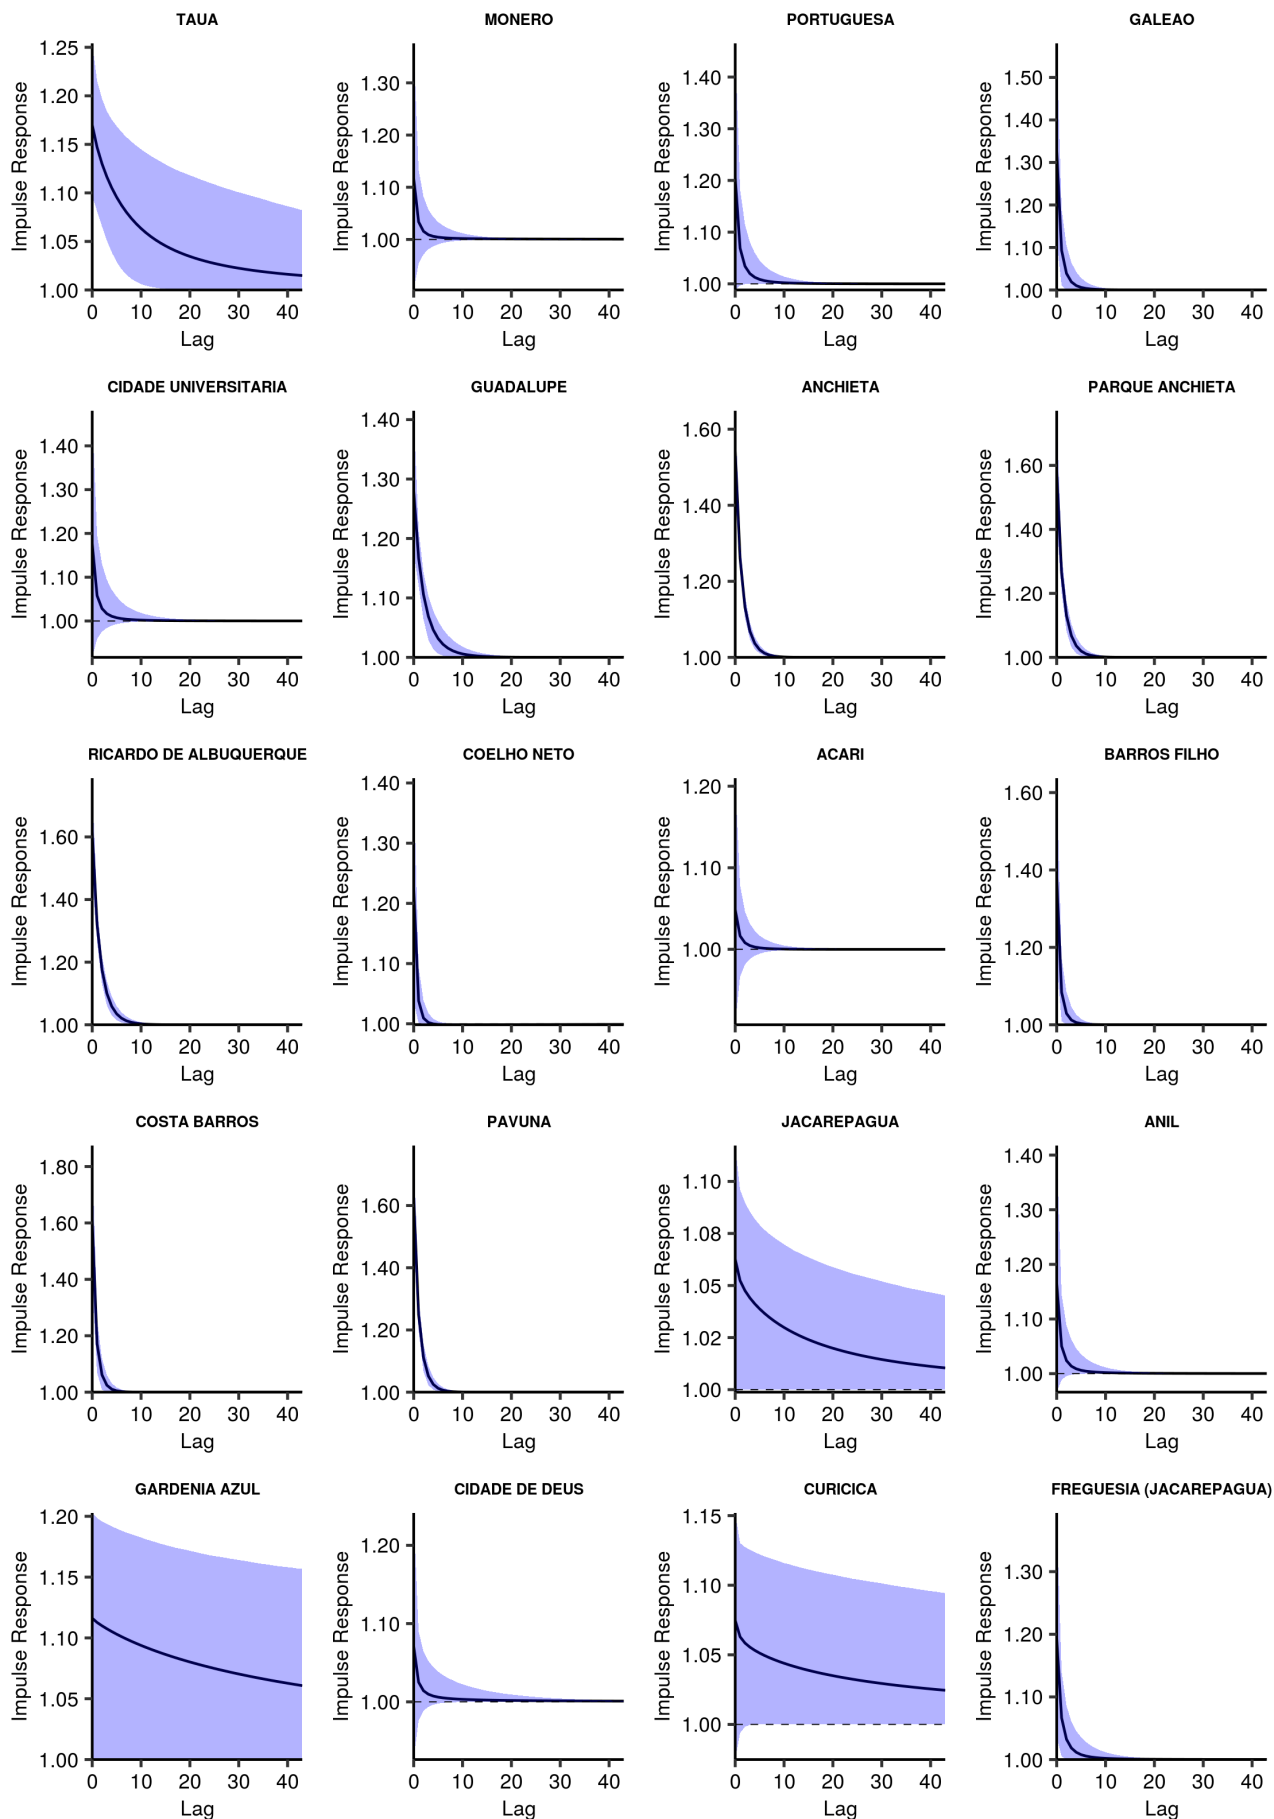

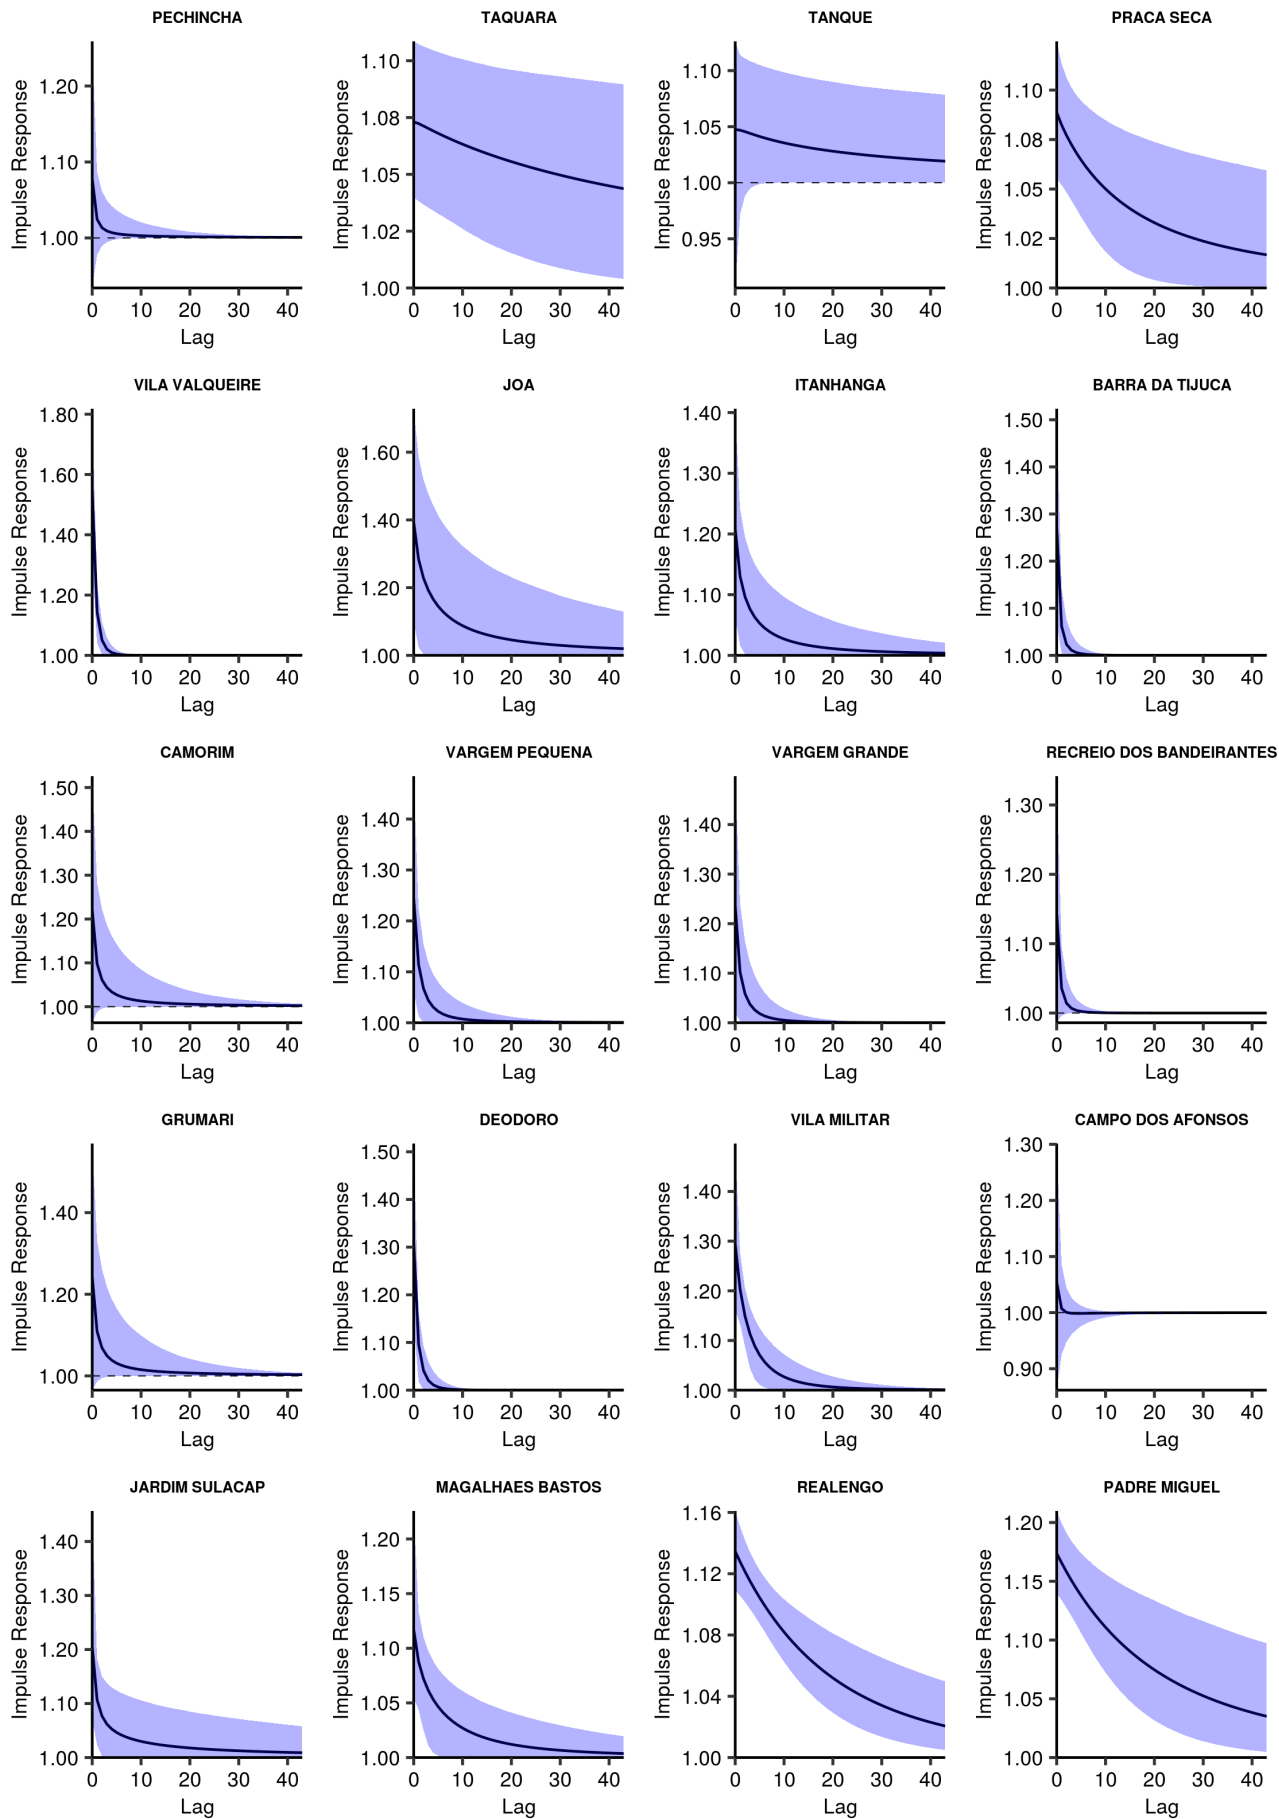

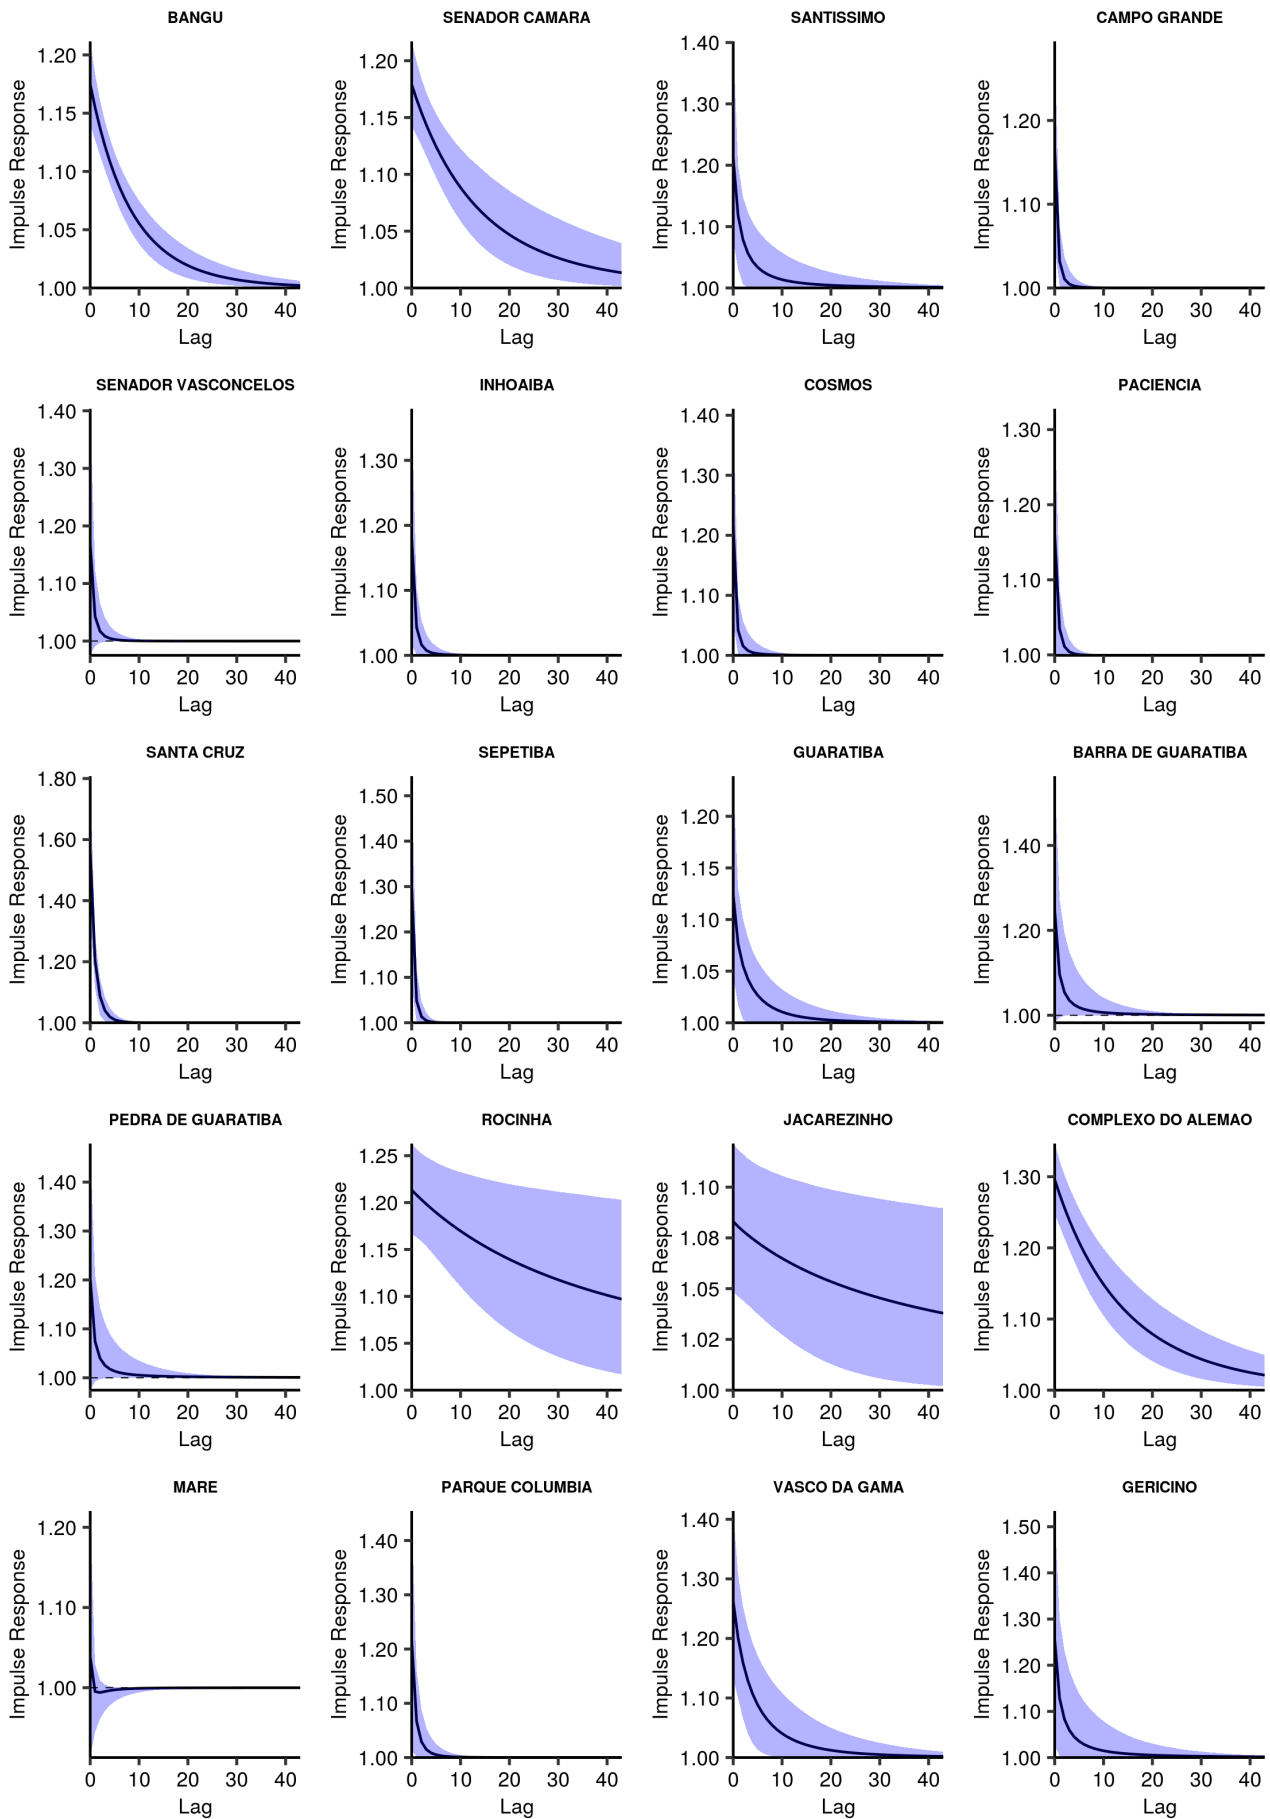

**Figure 4. Classification of the chikungunya relative risk by neighbourhood based on the 90% credible interval, selected weeks, Rio de Janeiro city, Brazil.**

Week 9

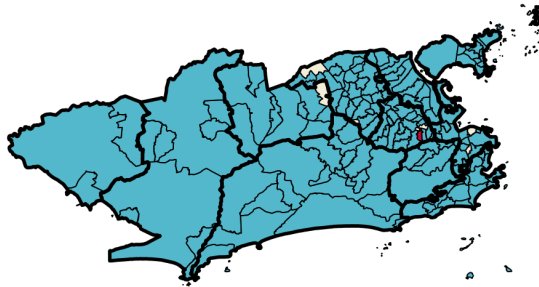

Week 11

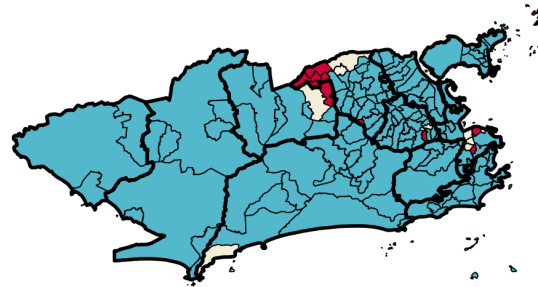

Week 13

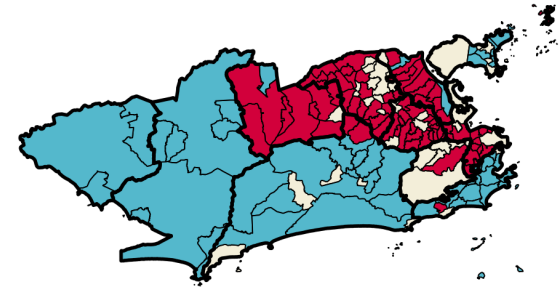

Week 15

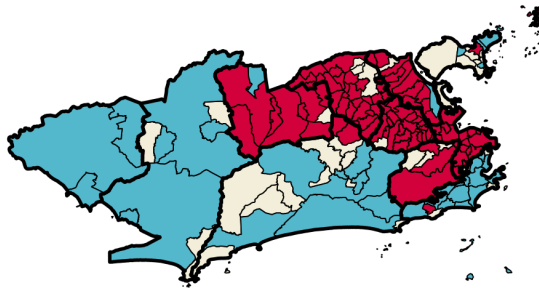

Week 17

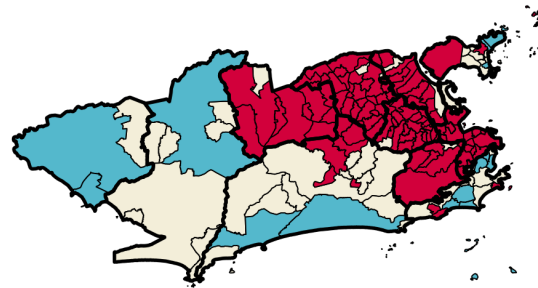

Week 19

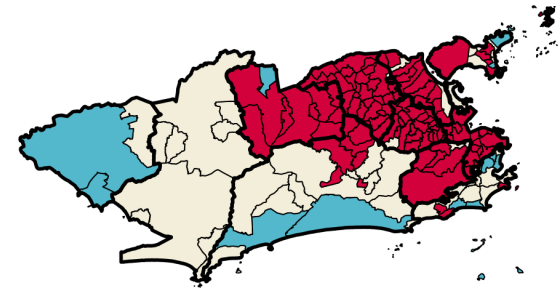

Week 29

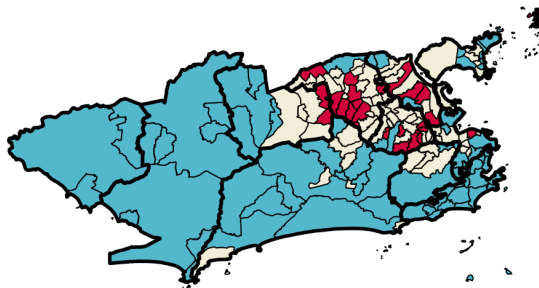

Week 31

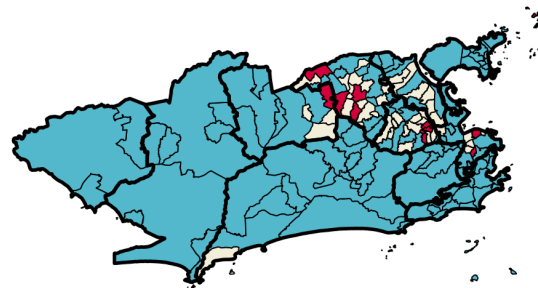

Week 33

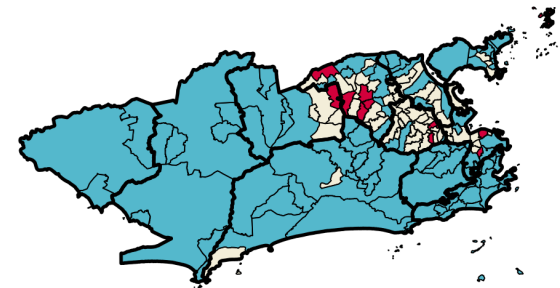

Relative risk  None  Protection  Risk
