1       Spatio-temporal modelling of the first Chikungunya epidemic in an intra-urban  
2               setting: the role of socioeconomic status, environment and temperature

3

4   Laís Picinini Freitas<sup>1,2\*</sup>, Alexandra M. Schmidt<sup>3</sup>, William Cossich<sup>4</sup>, Oswaldo Gonçalves Cruz<sup>2</sup>,  
5   Marilia Sá Carvalho<sup>2</sup>

6

7   <sup>1</sup> Programa de Pós-Graduação em Epidemiologia em Saúde Pública, Escola Nacional de Saúde  
8   Pública Sergio Arouca (ENSP), Oswaldo Cruz Foundation, Rio de Janeiro, Brazil

9   <sup>2</sup> Programa de Computação Científica (PROCC), Oswaldo Cruz Foundation, Rio de Janeiro, Brazil

10  <sup>3</sup> Department of Epidemiology, Biostatistics and Occupational Health, McGill University, Montreal,  
11  Canada

12  <sup>4</sup> Department of Physics and Astronomy, University of Bologna, Bologna, Italy

13

14  \* Corresponding author

15  E-mail: [lais.picinini.freitas@gmail.com](mailto:lais.picinini.freitas@gmail.com) (LPF)

## 16 **Abstract**

17 Three key elements are the drivers of *Aedes*-borne disease: mosquito infestation, virus circulating,  
18 and susceptible human population. However, information on these aspects are not easily available in  
19 low- and middle-income countries. We analysed data on factors that influence one or more of those  
20 elements to study the first chikungunya epidemic in Rio de Janeiro city in 2016. Using spatio-  
21 temporal models, under the Bayesian framework, we estimated the association of those factors with  
22 chikungunya notified cases by neighbourhood and week. To estimate the minimum temperature  
23 effect in a non-linear fashion, we used a transfer function considering an instantaneous effect and  
24 propagation of a proportion of such effect to future times. The sociodevelopment index and the  
25 proportion of green areas were included in the model with time-varying coefficients, allowing us to  
26 explore how their associations change throughout the epidemic. There were 13627 chikungunya  
27 cases in the study period. The sociodevelopment index presented the strongest association, inversely  
28 related with the risk of cases. Such association was more pronounced in the first weeks, indicating  
29 that socioeconomically vulnerable neighbourhoods were affected first and hardest by the epidemic.  
30 The proportion of green areas effect was null for most weeks. The temperature was directly  
31 associated with the risk of chikungunya for most neighbourhoods, with different decaying patterns.  
32 The temperature effect persisted longer where the epidemic was concentrated. In such locations,  
33 interventions should be designed to be continuous and to work in the long term. We observed that  
34 the role of the covariates change over time. Therefore, time-varying coefficients should be widely  
35 incorporated when modelling *Aedes*-borne diseases. Our model contributed to the understanding of  
36 the spatio-temporal dynamics of an urban *Aedes*-borne disease introduction in a tropical  
37 metropolitan city.

38

## 39 **Author Summary**

40 Viruses transmitted by the *Aedes* mosquitoes represent a major public health concern. With the  
41 abundance of the mosquito and susceptible human population, the entry of new *Aedes*-transmitted  
42 virus brings the risk of large epidemics. The first-ever chikungunya epidemic in Rio de Janeiro city,  
43 Brazil, happened in 2016. We used information neighbourhood information on environment,  
44 socioeconomic status, and weekly temperature, to study the disease spread within the city. Our  
45 results show that better socioeconomic status play a major role in preventing the disease, with  
46 poorer areas being affected first and harder by the epidemic. This highlights that improving  
47 socioeconomic and sanitary conditions are essential for *Aedes*-borne diseases prevention and  
48 control. The temperature increased the risk of chikungunya cases, and this effect persisted for  
49 longer in areas where the epidemic was concentrated. This indicates that interventions should be  
50 designed to be long-lasting in such locations. Our results contribute to understanding better the  
51 dynamics of a first urban *Aedes*-borne disease epidemic in a tropical metropolitan city, with the  
52 potential to help design better interventions for disease prevention and control.

## 53 **Introduction**

54       The first chikungunya virus (CHIKV) epidemic in Rio de Janeiro city, the second most  
55 populated city in Brazil and its leading tourist destination, occurred in 2016 [1]. CHIKV is  
56 transmitted to humans by the same vectors as dengue viruses (DENV), the *Aedes* mosquitoes [2].  
57 Vector-control activities have not prevented Rio de Janeiro from being endemic for dengue for  
58 years, nor from having experienced large dengue epidemics every three to four years, in general [3–  
59 5].

60       For a chikungunya epidemic to occur, three main elements are necessary, represented by the  
61 blue area in Fig 1: mosquito population, susceptible human population, and the virus circulating [6–  
62 8]. The *Ae. aegypti* mosquito is present all over the city of Rio de Janeiro, facilitating a new  
63 arbovirus is established. Because CHIKV and DENV belong to different families, previous  
64 immunity to DENV does not cross-react with CHIKV, and the population of Rio de Janeiro can be  
65 considered equally naïve to CHIKV before 2016. Therefore, given the presence of the mosquito  
66 population and susceptible human population, the occurrence of local CHIKV transmission in Rio  
67 de Janeiro was conditioned by the entry of the virus. Once the virus is circulating and established,  
68 how it will spread within the city depends on multiple factors. As a consequence, some areas of the  
69 city will experience the epidemic at different times, and will also have different attack rates.

70



71 **Fig 1. A theoretical model for a chikungunya epidemic in a given region. Direct associations**  
72 **are represented by black arrows and indirect associations by red arrows. The blue area**  
73 **includes the necessary elements for the epidemic to occur.**

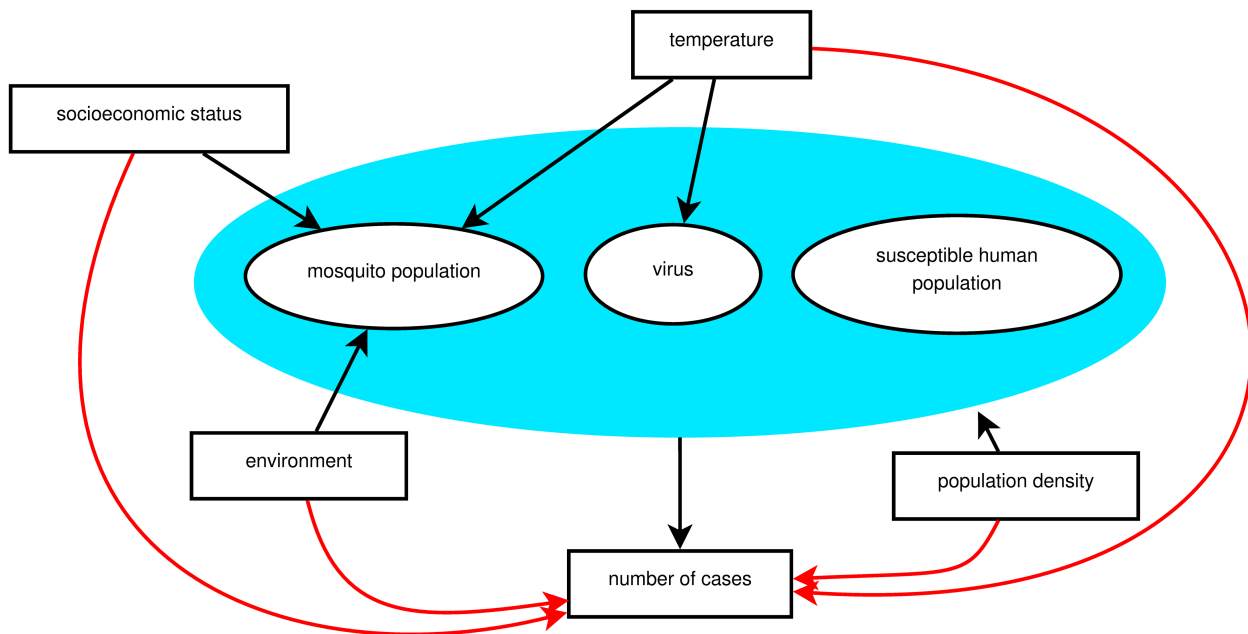

75 Reliable data regard to the intra-urban level of vector population, the susceptible human  
76 population over time, and the entry time of the virus in each location are necessary to understand  
77 the spatio-temporal dynamics of an epidemic. However, these data are not usually available.  
78 Alternatively, measured factors – such as temperature, socioeconomic and environmental factors –  
79 indirectly associated with the number of chikungunya cases (represented by red arrows in Fig 1) can  
80 be used as proxies. These factors have a direct effect (represented by black arrows in Fig 1) on the  
81 necessary elements for an epidemic to occur (inside the blue area), which are unmeasured. The  
82 temperature varies with time, and also present different effects on the epidemic over time.  
83 Socioeconomic and environmental characteristics take long periods to show important changes and  
84 can be considered fixed during the period of an epidemic. However, the way these factors impact  
85 the number of cases can change as the epidemic progresses, i.e., with time-varying effects.

86           The temperature affects the *Ae. aegypti* population, the virus, and the mosquito-virus  
87 interaction [9]. Ideal temperature conditions accelerate all stages of the mosquito life cycle,  
88 increasing the population in the long term. In the short term, the temperature influences the  
89 mosquito activity as well as the length of the virus incubation period, with maximal transmission  
90 occurring around 26–29°C [10]. Regarding the environment, the *Ae. aegypti* mosquitoes are highly  
91 adapted to urban settings, and the level of urbanisation is inversely correlated with the proportion of  
92 green areas [11]. The socioeconomic status impacts the mosquito population as disorderly  
93 urbanisation and inadequate sanitary conditions favour the presence of the mosquito most common  
94 reproduction site: containers filled with water found inside or in the surroundings of domiciles  
95 [12,13]. Furthermore, high population densities favour the contact between the mosquito and the  
96 human, increasing the chance of infection and transmission [14].

97           In the last decades, models that take into account the spatial dependency structure of the  
98 cases have been applied to better estimate covariates' association with *Aedes*-borne diseases  
99 epidemics [15–18]. The application of spatial models for intra-urban settings is growing more  
100 recently [19–22]. These model types, as the intrinsic conditional autoregressive (ICAR) models  
101 [23], are built under the assumption that adjacent areas share similar characteristics. The inclusion  
102 of a latent spatial random effect accounts for both the spatial structure and unmeasurable factors  
103 [24]. The inclusion of time-varying coefficients allows us to explore how the effect of the covariates  
104 change throughout the epidemic. The temperature is usually included in statistical models for  
105 *Aedes*-borne diseases in a linear fashion and with a pre-defined lag. We propose to estimate the  
106 temperature effect in a non-linear framework using a transfer function, including an immediate  
107 effect and a memory effect that propagates to future times. Another advantage of using a transfer  
108 function is that the estimation of the lag of the effect is data-driven [25].

109           We used this methodological approach (ICAR models with time-varying coefficients and a  
110 transfer function) to identify how temperature, socioeconomic and environmental factors are related

111 to the space-time progression of an *Aedes*-borne disease epidemic in an intra-urban setting. The first  
112 chikungunya epidemic in Rio de Janeiro, a large tropical city with environmental and  
113 socioeconomic disparities, presents ideal conditions to this end.

114

## 115 **Methods**

### 116 **Study site**

117 Rio de Janeiro is the second-largest city in Brazil, with 6,3 million inhabitants (2010), and its  
118 primary tourist destination. Rio's area is of 1204 km<sup>2</sup>, with 160 neighbourhoods grouped into four  
119 large regions (Downtown, South, North and West). These regions are subdivided in 10 health  
120 districts called programmatic areas: area 1.0 (Downtown region); areas 2.1 and 2.2 (South region);  
121 areas 3.1, 3.2, 3.3 (North region); and areas 4.0, 5.1, 5.2 and 5.3 (West region) (Fig 2).

122 **Fig 2. Rio de Janeiro city by programmatic areas and neighbourhoods, 2010, Brazil.**

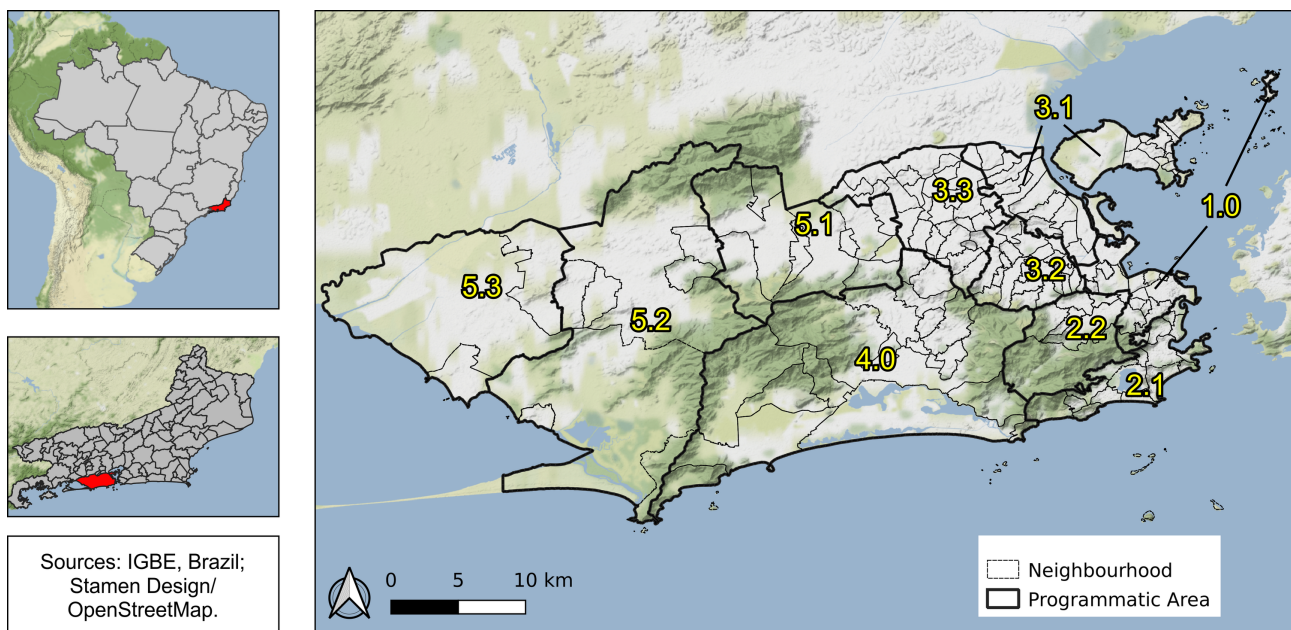

124 With three mountain massifs and 84 km of beaches, Rio has a diverse geography that is  
125 directly associated with the history of occupation and with socioeconomic disparities [26]. The  
126 Downtown region is the historical, commercial and financial centre of the city, with many cultural

127 establishments. The South region is the most popular tourist destination, with famous beaches and  
128 wealthy neighbourhoods. In the North region, there are very large slums (“*favelas*”) and nearly 27%  
129 of the population, almost 2.4 million people, live in such communities [27]. The West region has  
130 more heterogeneous characteristics among its neighbourhoods, being the area 5.1 more densely  
131 populated, areas 5.2 and 5.3 less urbanised, and area 4.0 wealthier.

132

### 133 **Data**

#### 134 *Chikungunya cases*

135 Data on chikungunya cases were obtained from the Notifiable Diseases Information System  
136 (SINAN) via the Rio de Janeiro Municipal Secretariat of Health and are publicly available [28].

137 We analysed notified cases of chikungunya (confirmed by laboratory or clinical-  
138 epidemiological criteria) occurring in Rio de Janeiro municipality between January and December  
139 2016, by week and neighbourhood of the patient’s residence.

140 Case definitions follow the Ministry of Health protocols. A suspected case of chikungunya is  
141 defined as a patient with sudden fever of over 38.5°C and severe arthralgia or arthritis not explained  
142 by other conditions, and who either lives in endemic areas or has visited one up to two weeks before  
143 the onset of symptoms or has an epidemiological link with a confirmed case. A confirmed case is a  
144 suspected case with at least one positive specific laboratory test for CHIKV or confirmed by  
145 clinical-epidemiological criteria [29].

#### 146 *Socioeconomic data*

147 To characterise the socioeconomic status, we obtained the sociodevelopment index data by  
148 neighbourhood from the *Instituto Pereira Passos* [30]. This index is based on eight indicators from  
149 the 2010 Demographic Census: 1) the percentage of domiciles with adequate water supply; 2) the  
150 percentage of domiciles with adequate sewage; 3) the percentage of domiciles with garbage  
151 collection; 4) the average number of toilets per resident; 5) the percentage of illiteracy among

152 residents between 10 and 14 years old; 6) per capita income of the domiciles, expressed as  
153 minimum wages; 7) the percentage of domiciles with per capita income up to one minimum wage,  
154 and 8) the percentage of domiciles with per capita income greater than five minimum wage. The  
155 sociodevelopment index is calculated as the arithmetic average of the normalised indicators (each  
156 ranging from 0 to 1, being 0 the worst socioeconomic condition and 1, the best) [30].

157 We also obtained data on the population by neighbourhood from the *Instituto Pereira Passos*  
158 [31].

### 159 *Environment and temperature data*

160 Land use data for the city of Rio de Janeiro were obtained from the *Instituto Pereira Passos*  
161 as a shapefile [32]. We created the category “green areas” by aggregating: agricultural areas, areas  
162 with swamps and shoals, areas with tree and shrub cover, and areas with woody-grass cover. After  
163 that, we calculated the proportion of green areas for each neighbourhood (Fig 4B).

164 Temperature information for 2016 was obtained from 38 meteorological weather stations in  
165 Rio de Janeiro, from five different meteorological and environmental institutes. The institutes are  
166 the Brazilian National Institute of Meteorology [33], the Brazilian Airspace Control Department  
167 [34], the Rio de Janeiro State Environmental Institute [35], the Rio de Janeiro Municipal  
168 Environmental Secretariat [36] and the *Alerta Rio* System [37]. All measurements are made  
169 according to the recommendations of the World Meteorological Organization [38]. The institutes  
170 make their meteorological data publicly available, being that the frequency of measurements of the  
171 first four organisations is hourly, while the *Alerta Rio* System measurements are made every 15  
172 minutes.

173 From the temperature measurements, we computed the daily maximum, minimum and mean  
174 temperature. We also evaluated the availability of daily data in terms of missing measurements. The  
175 daily records that had more than 60% of missing measurements were excluded. We decided to use  
176 the minimum temperature as in tropical climates it acts as a limiting factor for the *Ae. aegypti*

177 activity and population [39,40]. We then obtained the minimum temperature for each week and  
178 station, and, to obtain the minimum temperature by neighbourhood, we applied universal kriging.  
179 Briefly, kriging is a method that uses a sample of data points to estimate the value of a given  
180 variable over a continuous space [41]. First, we interpolated the minimum temperature to a grid  
181 with each unit measuring 500m x 500m. The grid with the meteorological weather stations locations  
182 is displayed in the S1 Fig. Then we obtained the minimum temperature of the neighbourhood by  
183 calculating the average of the minimum temperature of the grid units whose centroids were within  
184 the boundaries of the neighbourhood.

185 To process and organise the environmental data, we used R version 3.6.1 [42] and packages  
186 sf [43], geoR [44] and tidyverse [45].

187

## 188 **Statistical analysis**

189 We used the Stan platform [46,47] to fit spatio-temporal models, more specifically ICAR  
190 models, to a dataset consisting of neighbourhoods counts of chikungunya cases, exploring the  
191 relationship with sociodevelopment index, the proportion of green areas and minimum temperature.  
192 Let  $Y_{i,t}$  be the counts of chikungunya cases at neighbourhood  $i = 1, 2, \dots, n = 160$ , and week  $t = 1, 2,$   
193  $\dots, T$ , where  $Y_{i,t} \sim \text{Poisson}(\mu_{i,t})$ . We explored different structures for  $\mu_{i,t}$ , presented in the S1  
194 Appendix along with each Watanabe-Akaike information criterion (WAIC) [48]. The model selected  
195 based on the WAIC has the following structure:

$$\begin{aligned} \log(\mu_{i,t}) &= \log(e_i) + \beta_0 + X'_i \beta_{k,t} + U_{i,t} + \phi_i \\ U_{i,t} &= \rho_i U_{i,t-1} + \zeta_i \text{Temperature}_{i,t} \end{aligned} \quad (1)$$

196 The latent spatial effect is represented by  $\phi$ , which, a *priori*, follows a conditional  
197 autoregressive distribution [23]; that is, the conditional distribution of each  $\phi_i$  follows a normal  
198 distribution whose mean and variance depend on the neighbourhood structure  $w_{ij}$ . Assuming a  
199 binary neighbourhood structure, where  $w_{ij}=1$  if areas  $i$  and  $j$  share borders and 0 otherwise, each  $\phi_i$

200 follows a conditional normal distribution whose mean is equal to the average of its neighbours, and  
201 its variance is inversely proportional to the number of neighbours  $d_i$ , that is:

$$202 \quad p(\phi_i | \phi_{i \sim j}) = N\left(\frac{\sum_{i \sim j} \phi_i}{d_i}, \frac{\sigma^2}{d_i}\right) \quad (2)$$

203 The expected number of chikungunya cases at neighbourhood  $i$  ( $e_i$ ) represents the number of  
204 cases that would have been observed if there were no differences in the incidence of cases across  
205 time and space:

$$206 \quad e_i = \left( \frac{\sum_{i=1}^n \sum_{t=1}^T Y_{i,t}}{\sum_{i=1}^n \text{population}_i} \text{population}_i \right) / T \quad (3),$$

207  $\beta_0$  is the intercept,  $X'_i$  represents a vector of  $k$  covariates and  $\beta_{k,t}$  is the coefficient of covariate  $k$  in  
208 week  $t$ . We decided to allow for time-varying coefficients for the covariates to explore if their  
209 association with the number of cases vary as the epidemic progresses. The covariates included in  
210 the  $X'_i$  vector were sociodevelopment index and proportion of green areas. The proportion of green  
211 areas showed a skewed distribution. Therefore, this variable was transformed to the cubic root. We  
212 also fitted models including the population density. However, the 90% credible interval (CI) of the  
213 population density coefficient included 0 for most weeks, and the inclusion of this variable  
214 increased the WAIC . Therefore, the population density was not considered in the final model.

215 We estimated the temperature effect in a non-linear fashion using a transfer function ( $U_{i,t}$ ),  
216 considering that the temperature has an immediate effect ( $\zeta_i$ ) and that a proportion ( $\rho_i$ ) of this effect  
217 propagates to future times. This proportion  $\rho_i$  is called memory effect and we considered it to be any  
218 value between 0 and 1 [25]. To combine and visualise both effects of the temperature, we obtained  
219 the impulse response function of the temperature for each neighbourhood. This function expresses  
220 the effect of a 1 unit increase in the temperature of one week propagating in time [25]. The  
221 temperature was standardised.



222 The models were fitted under the Bayesian framework using the Stan platform [46,47] to run  
223 four chains of 10000 iterations each where the first 5000 were the warmup. Relatively vague,  
224 proper prior distributions were used. We visually inspected the chains and used the R-hat statistic to  
225 check convergence [46,49]. Model validation was performed by comparing the fitted number of  
226 cases (mean and 90% CI) with the observed number of cases [48]. It is worth mentioning that we  
227 also fitted models that considered the reparametrisation of the Besag-York-Mollié (BYM2) as  
228 proposed by Riebler et al. [50]. However, the random component was over 90% spatial, and the  
229 unstructured effect 90% CI included zero for all neighbourhoods.

230 For the statistical analysis, we used R version 3.6.1 [42] and packages RStan [51] and loo,  
231 which was used to obtain the WAIC [52]. The R script and models codes in Stan are available at  
232 [https://github.com/laispfreitas/ICAR\\_chikungunya](https://github.com/laispfreitas/ICAR_chikungunya) [53]. Maps and graphs were created using QGIS  
233 version 3.12 [54] and ggplot2 version 3.2.0 [55].

234

## 235 **Ethics Statement**

236 This study was approved by the Research Ethics Committee of Escola Nacional de Saúde  
237 Pública Sergio Arouca (ENSP) – Fundação Oswaldo Cruz, approval number 2.879.430. Informed  
238 consent was not required as this is a study using secondary data and the data were analysed  
239 anonymously.

240

## 241 **Results**

242 Between January and December 2016, 13,627 cases of chikungunya were notified in the city  
243 of Rio de Janeiro, corresponding to an incidence of 21.6 cases per 10,000 inhabitants. The number  
244 of cases peaked at week 17/2016, with 1118 chikungunya cases (Fig 3A). The cumulative number  
245 of cases by neighbourhood ranged from 0 (Grumari, area 4.0) to 721 (Realengo, area 5.1). The  
246 highest incidence was found in Catumbi (area 1.0), of 211.0 cases per 10,000 inhabitants (Fig 3B).



247 **Fig 3. Notified chikungunya cases by week (A) and chikungunya cases cumulative incidence**  
248 **per 10,000 inhabitants by neighbourhood (B), January to December 2016, Rio de Janeiro city,**  
249 **Brazil.**

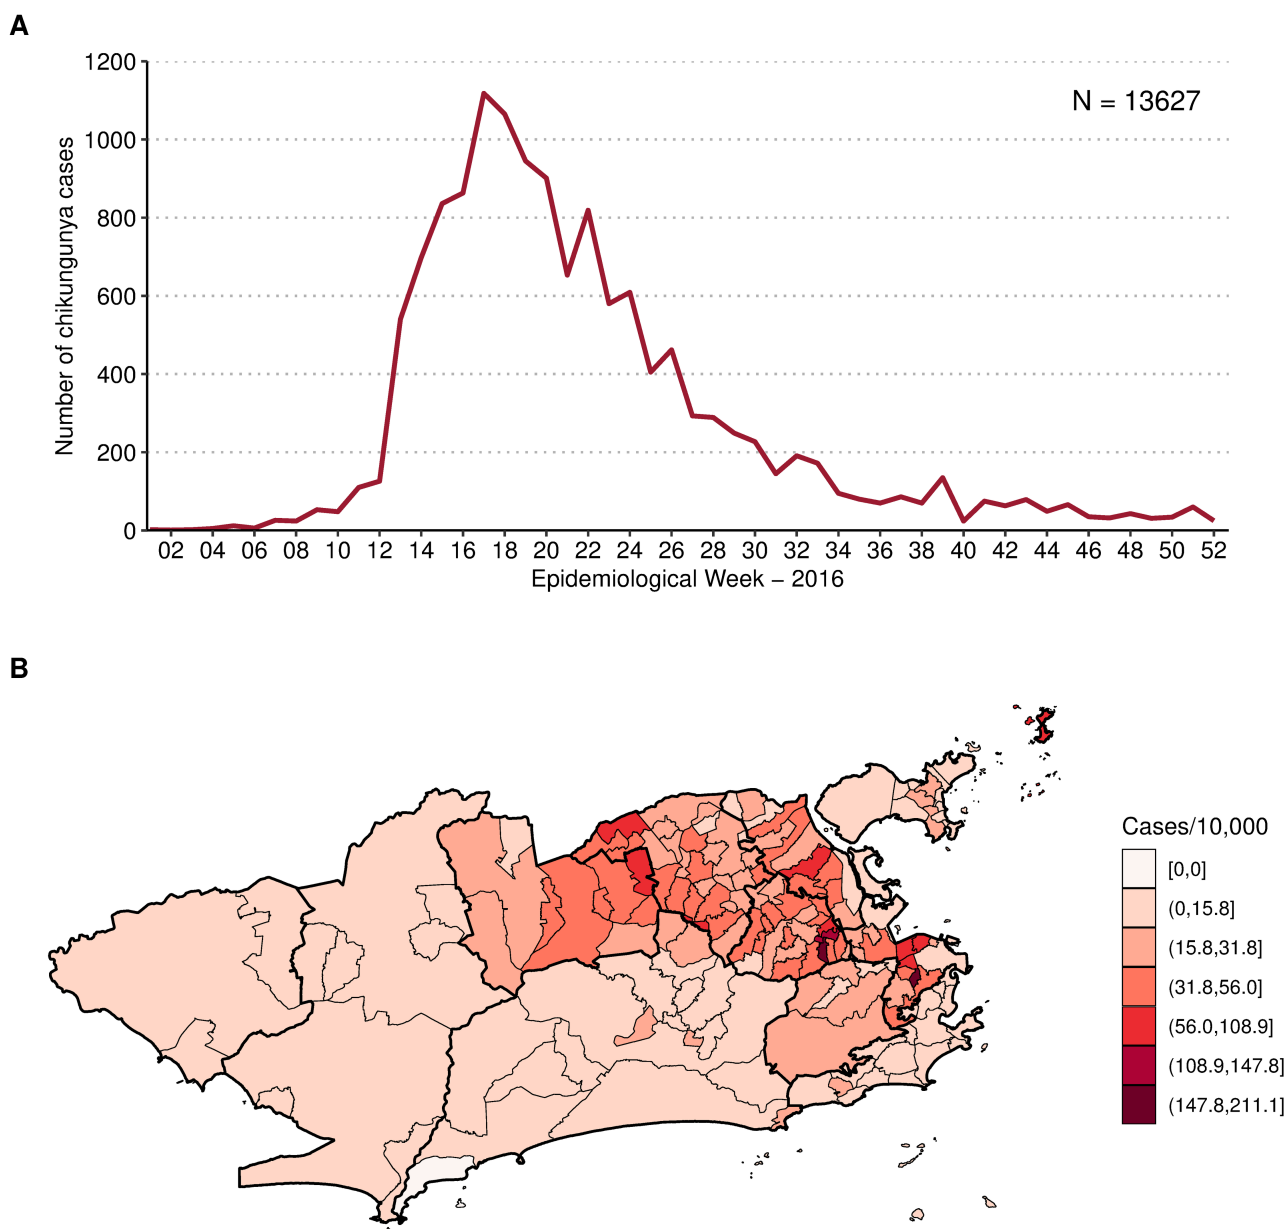

251 The mean sociodevelopment index was 0.6080, ranging from 0.282 in Grumari (area 4.0) to  
252 0.819 in Lagoa (area 2.1). Higher sociodevelopment indexes were observed in the areas 2.1 and 4.0  
253 (Fig 4A). Fifteen neighbourhoods did not have any green areas, mostly located in areas 1.0, 3.1, 3.2

254 and 3.3 (Fig 4B). Alto da Boa Vista (area 2.2) presented the highest percentage of green areas, of  
255 90.4%. The average minimum temperature was 19.9 °C, ranging from 10.7 °C in Campo dos  
256 Afonsos (area 5.1) to 26.1 °C in Cidade Nova (area 1.0). Neighbourhoods in the east coastal region  
257 of Rio had higher temperatures on average (Fig 4C). The temperature decreased in the city around  
258 week 17, starting to increase again around week 35 (Fig 4D).

259 **Fig 4. Sociodevelopment index in 2010 (A), percentage of green areas in 2015 (B), minimum**  
260 **temperature (°C) average in 2016 by neighbourhood (C) and boxplot of the minimum**  
261 **temperature (°C) by neighbourhood and week (D), Rio de Janeiro city, Brazil.**

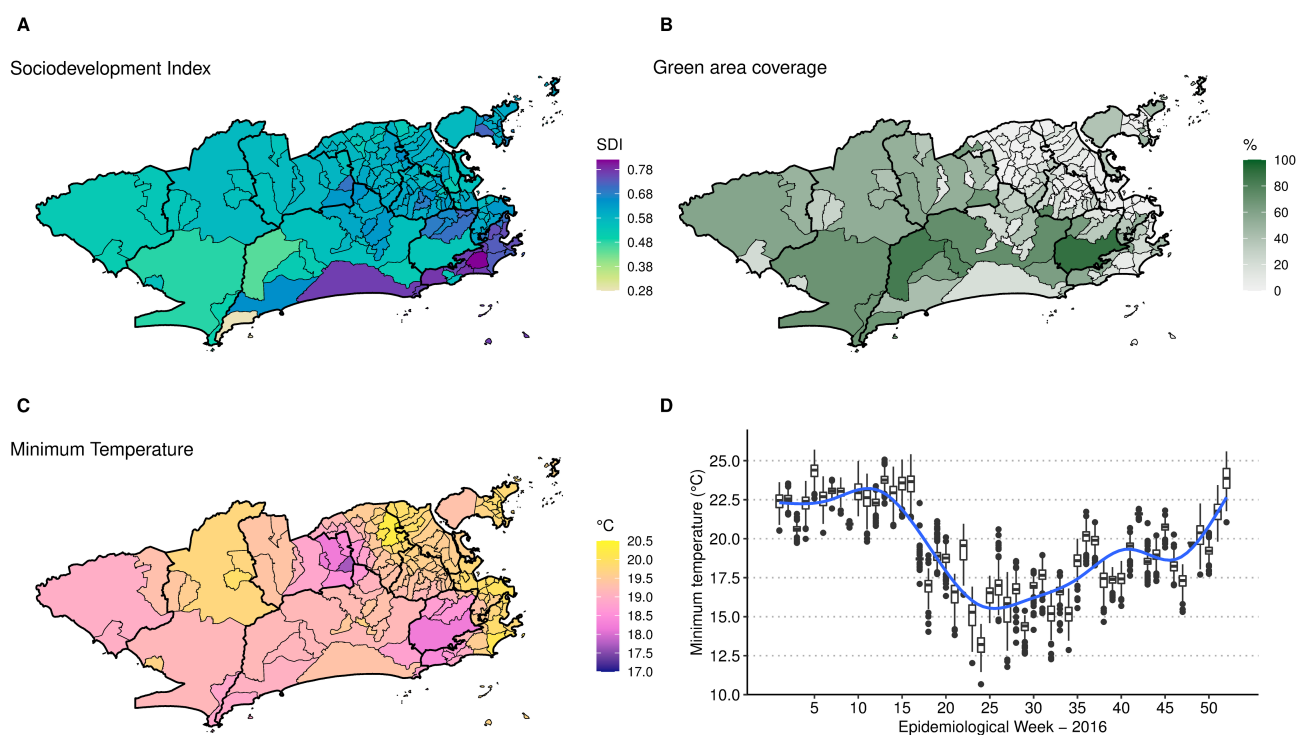

263 Due to the small numbers of chikungunya cases at the beginning of 2016, we decided to  
264 model the cases starting at week 9, when the number of cases in the city exceeded 50 for the first  
265 time.

266 The posterior summary (mean and 90% CI) of the time-varying coefficients for  
267 sociodevelopment index and proportion of green areas is presented in Fig 5. The sociodevelopment  
268 index presented a strong protective effect at the beginning of the epidemic. The sociodevelopment

269 index effect was inversely associated with the epidemic curve: as the number of cases increased, the  
270 protective effect decreased, remaining almost constant during the peak of the epidemic, and  
271 increasing again once the number of cases started decreasing. The effect of the sociodevelopment  
272 index was null during the peak of the epidemic (around week 17). The proportion of green areas  
273 effect included 0 in the 90% CI in most of the weeks. However, when the spatial component was  
274 not included in the model, it presented a protective effect (Fig C in S2 Fig).

275 **Fig 5. Time-varying coefficients (in the log scale, mean and 90% credible interval) for**  
276 **sociodevelopment index (SDI) (A) and proportion of green areas (B) for a spatial model for**  
277 **chikungunya cases from weeks 9 to 52 2016 and controlling for minimum temperature, Rio de**  
278 **Janeiro city, Brazil.**

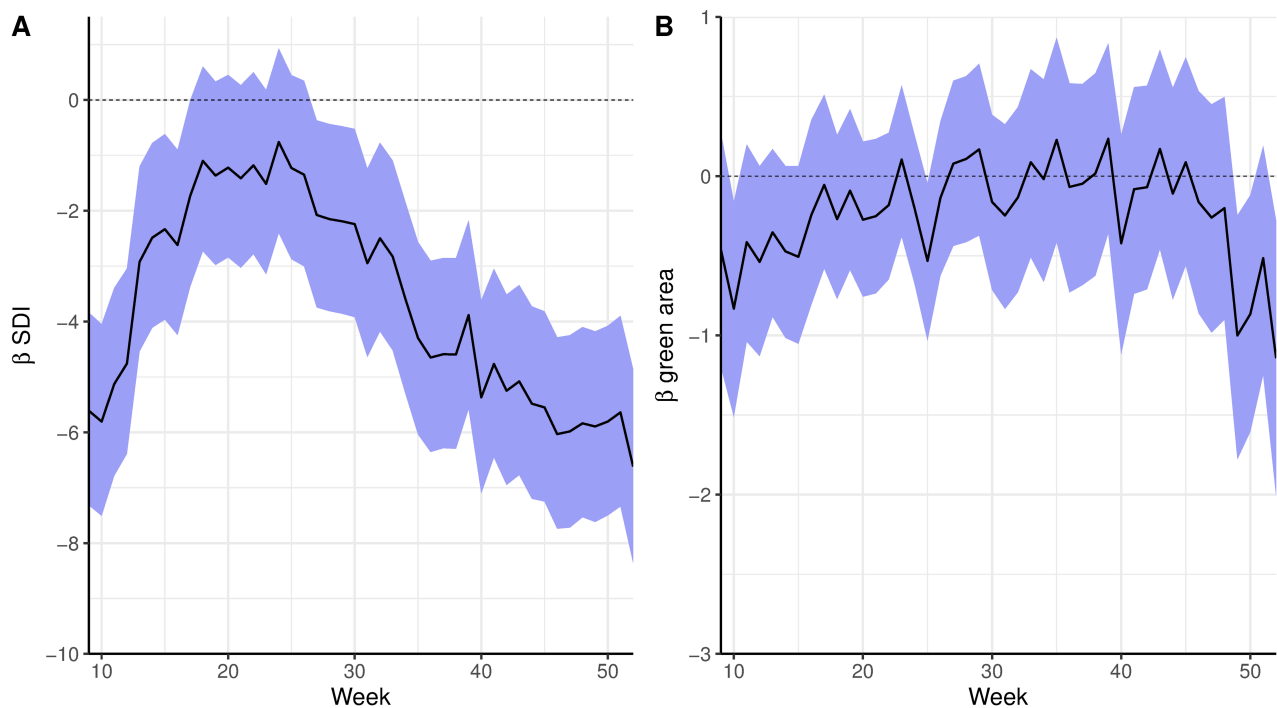

280 The latent spatial structure has a clear trend of positive spatial effects in areas where the  
281 epidemic was concentrated (areas 1.0, 2.2, the mainland part of 3.1, 3.2, 3.3 and 5.1) and negative  
282 spatial effects in less affected areas (Fig 6). The inclusion of the covariates in the final model

283 decreased the spatial effects in 102 of the 160 neighbourhoods compared to the model with only the  
284 spatial effect (S3 Fig).

285 **Fig 6. Chikungunya cases mean spatial effects (in the log scale) controlling for**  
286 **sociodevelopment index, proportion of green areas, and minimum temperature, weeks 9 to 52**  
287 **2016, Rio de Janeiro city, Brazil.**

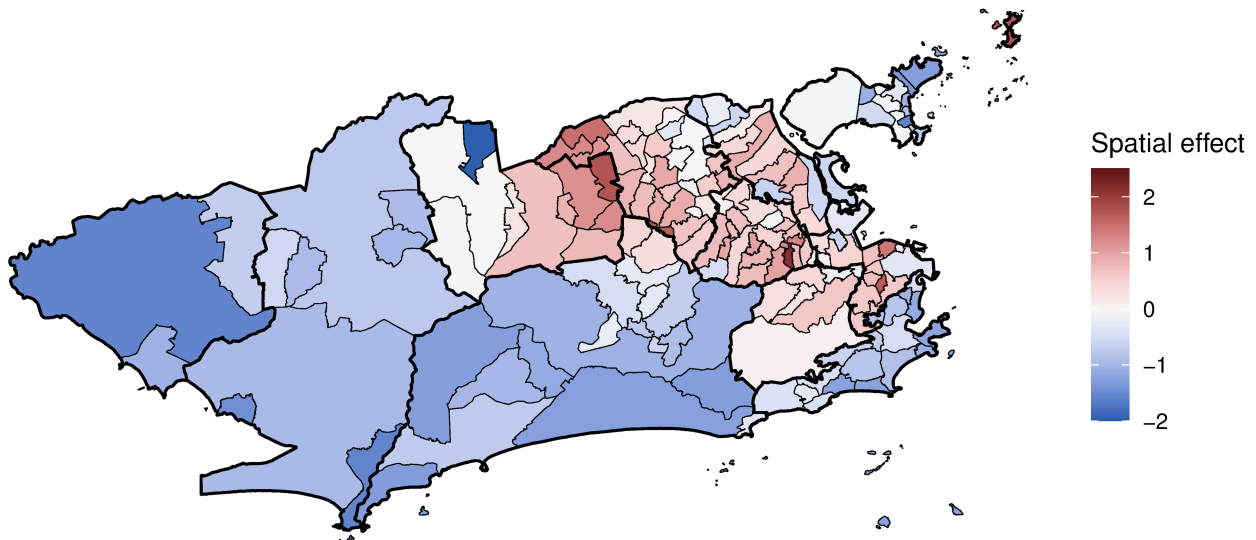

289 The posterior distributions (mean and 90% CI) of the instantaneous and memory effects of  
290 the minimum temperature are displayed in Fig 7. For most neighbourhoods (113/160, or 70.6%) the  
291 instantaneous effect of the temperature increased the risk of chikungunya cases (Fig 7A). The  
292 instantaneous temperature effect, however, was in general small, reaching its maximum in Catumbi  
293 (area 1.0), where the temperature relative risk was 2.28 (90%CI 2.07-2.53). The memory effect (Fig  
294 7B) represents the propagation in time of the instantaneous effect. Therefore, in neighbourhoods  
295 where the instantaneous temperature effect was null, the memory effect is irrelevant.

296

297 **Fig 7. Minimum temperature instantaneous effect (in the same week) (A) and memory effect**  
298 **(B) on chikungunya cases (in the log scale) by neighbourhood, mean and 90% credible**  
299 **interval, controlling for sociodevelopment index and proportion of green areas, and the latent**  
300 **spatial effect, weeks 9 to 52 2016, Rio de Janeiro city, Brazil.**

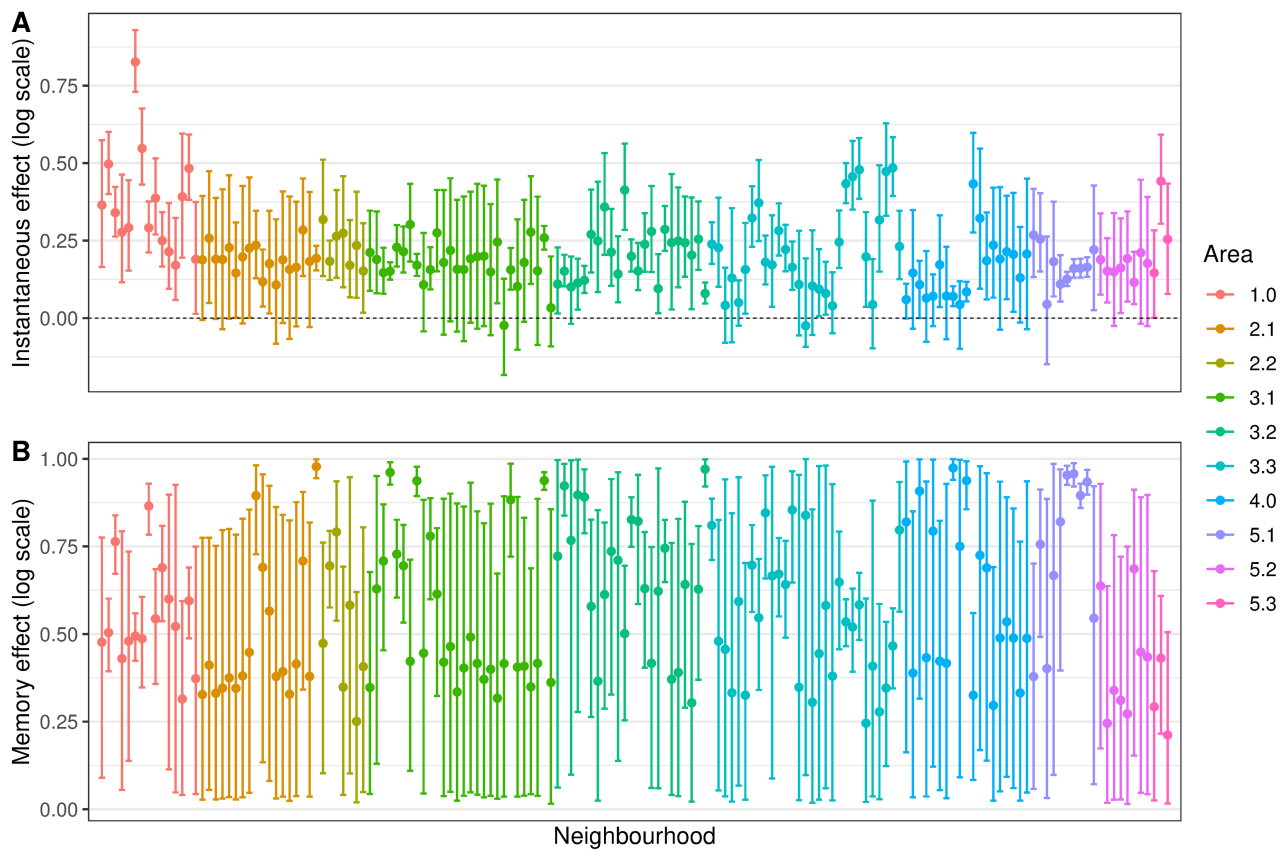

302 The combined effect of the minimum temperature, represented by the impulse response  
303 function, presented three patterns. These patterns are exemplified with nine selected  
304 neighbourhoods in Fig 8: null effect (Fig 8 first row), rapid decay of the effect (second row), and  
305 slow decay of the effect (third row). The impulse response functions for all neighbourhoods are  
306 available in the S4 Fig.

307

308 **Fig 8. Impulse response function of the minimum temperature effect on chikungunya cases**  
309 **over time, posterior mean and 90% credible interval, controlling for sociodevelopment index**  
310 **and proportion of green areas, and the latent spatial effect, in selected neighbourhoods, Rio de**  
311 **Janeiro city, Brazil.**

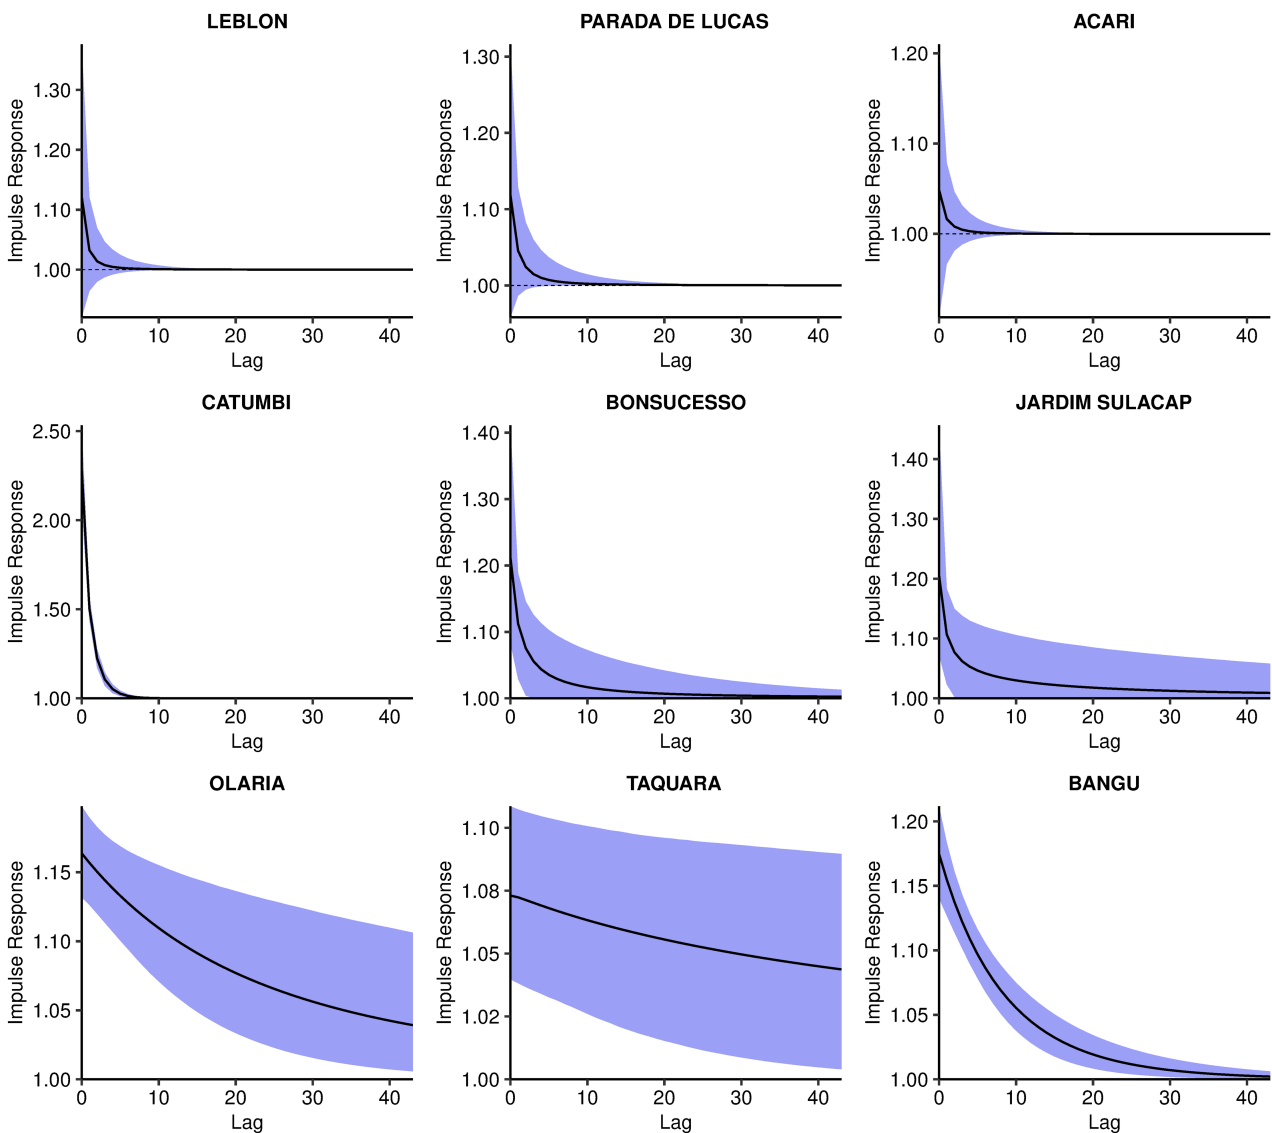

313 The impulse response function is represented in time and space in Fig 9 and S1 Video. The  
314 first map depicts the mean temperature instantaneous relative risk, the impulse. The following maps  
315 show the propagation of the impulse on subsequent weeks. When the temperature relative risk is  
316 null (90% CI includes the 1), the neighbourhood is depicted blank. The strong memory effect in

317 some neighbourhoods (Fig 7B) is observed by the persistence of the temperature effect for several  
318 weeks after the impulse. However, such effect declines to values very close to 1. These  
319 neighbourhoods were concentrated in the areas 1.0, 2.2, mainland 3.1, 3.2, 3.3 and 5.1.

320 **Fig 9. Minimum temperature instantaneous effect on chikungunya cases and its propagation**  
321 **in time by neighbourhood in selected weeks, controlling for sociodevelopment index and**  
322 **green areas proportion, and the latent spatial effect, Rio de Janeiro city, Brazil.**

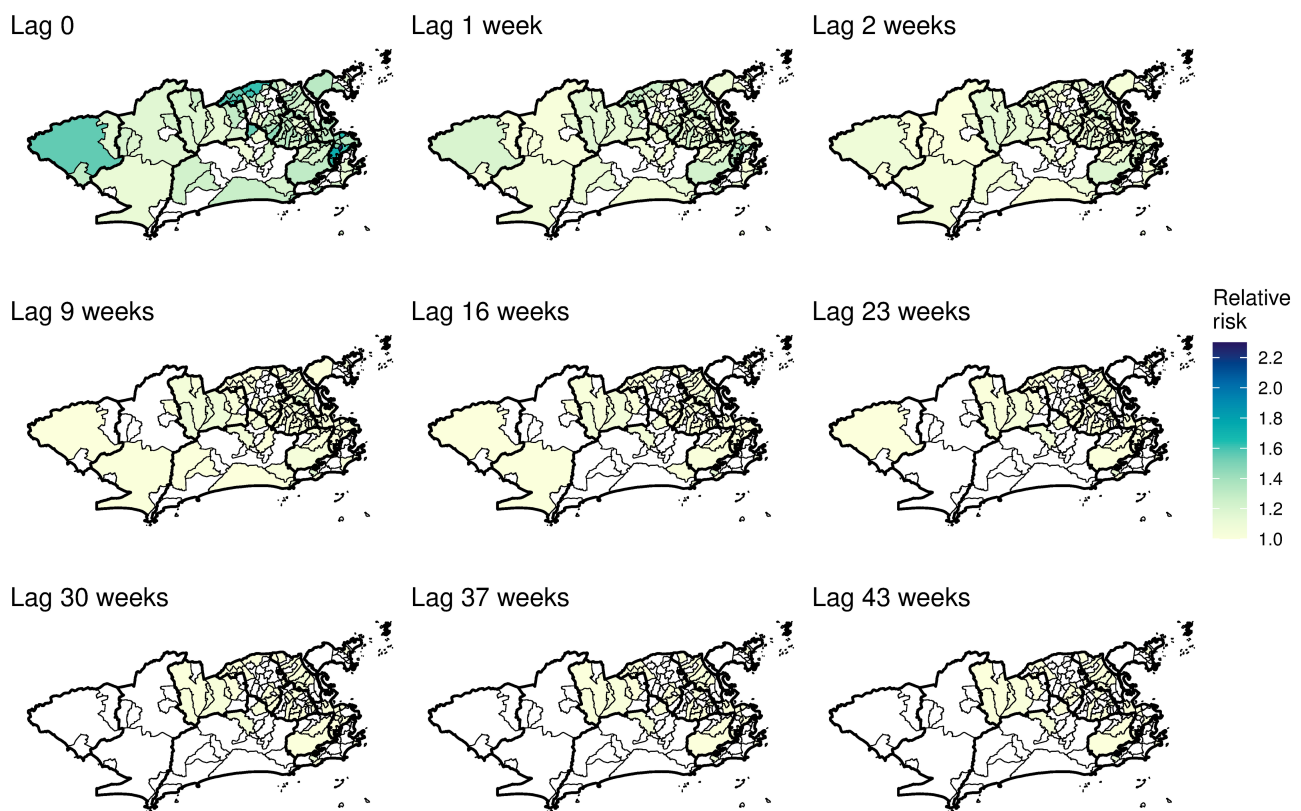

324 The mean estimated chikungunya relative risk increased rapidly in the first weeks, peaking at  
325 week 17 and then decaying progressively (S2 Video and Fig 10). The decrease in the chikungunya  
326 relative risk coincided with the decrease in the minimum temperature in the city (Fig 4D). High  
327 relative risks for chikungunya were mostly observed in the areas 1.0, 2.2, 3.1, 3.2, 3.3 and 5.1. The  
328 neighbourhoods of the remaining areas presented chikungunya relative risks below 1 for almost the



329 entire study period. The classification of the neighbourhoods in terms of chikungunya relative risk  
330 considering the 90% CI is available in the S5 Fig.

331 **Fig 10. Posterior mean chikungunya relative risk by neighbourhood in selected weeks,**  
332 **controlling for sociodevelopment index, proportion of green areas, and minimum**  
333 **temperature, and the latent spatial effect, Rio de Janeiro city, Brazil.**

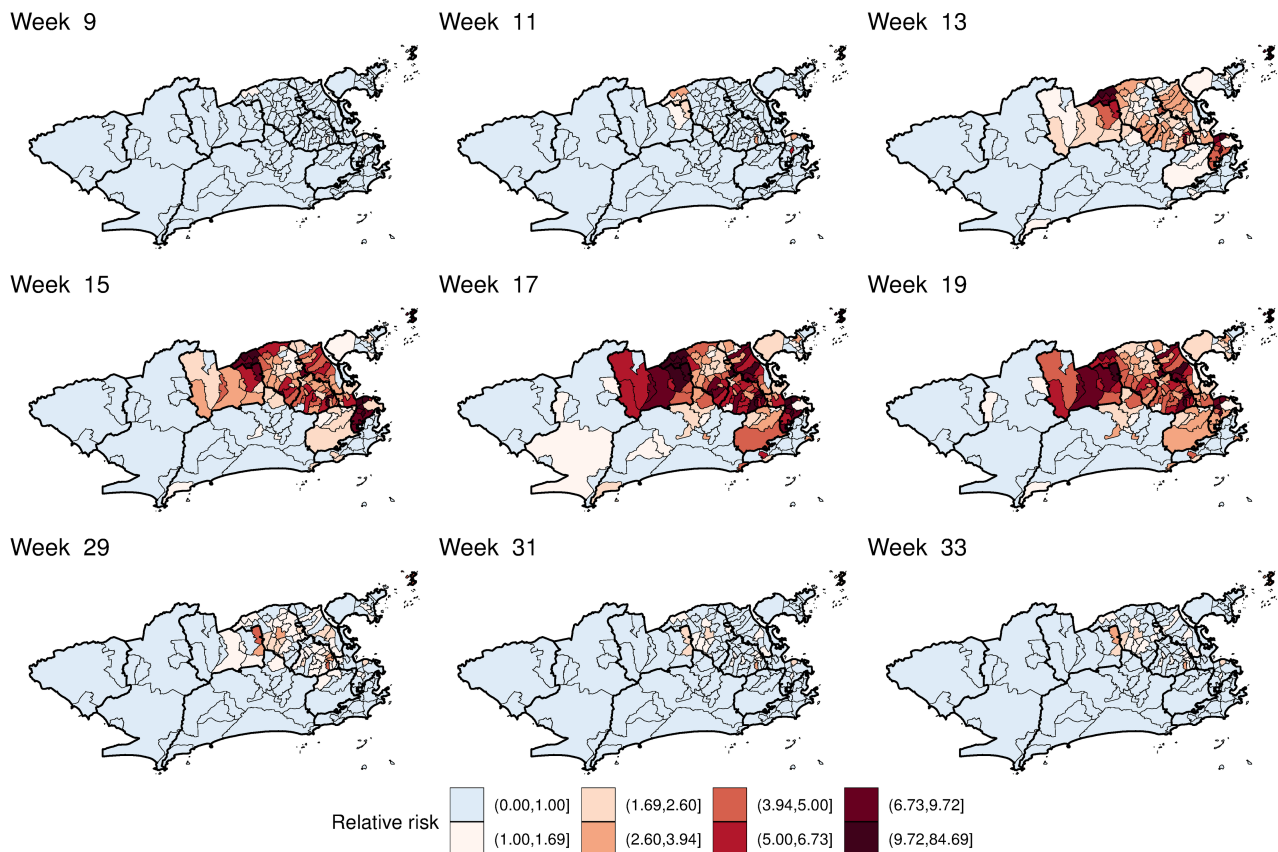

## 335 Discussion

336 In this study, we estimated the association of socioeconomic status, environment, and  
337 temperature with the spatio-temporal distribution of the first chikungunya epidemic in Rio de  
338 Janeiro city. The sociodevelopment index and the proportion of green areas were included in the  
339 model with time-varying coefficients, allowing us to explore how the effects of these factors  
340 changed throughout the epidemic. The temperature was included in the model in a non-linear  
341 fashion using a transfer function, considering that the temperature has an immediate effect and that



342 a proportion of this effect propagates to future times. To our knowledge, this is the first time a  
343 transfer function is applied for temperature when modelling *Aedes*-borne diseases.

344 The sociodevelopment index was inversely associated with the risk of chikungunya in all  
345 models (Fig 5A, Figs A and B in S2 Fig). In fact, the sociodevelopment index presented the  
346 strongest effect in the models, which strengthens the hypothesis of chikungunya being a disease of  
347 social determination. This index is composed of sanitary conditions indicators, among others, and  
348 poor sanitary conditions are known to favour the reproduction of the *Ae. aegypti* mosquitoes. The  
349 association of low socioeconomic locations with increased risk of chikungunya was also found in a  
350 study in French Guiana [56] and in a study in Barraquilla, a Colombian city [21]. Our results  
351 indicate that poor neighbourhoods were affected first and hardest by the chikungunya epidemic,  
352 highlighting the importance of vector control activities in socioeconomically vulnerable locations.

353 When the spatial dependency was not included in the model, the proportion of green areas  
354 was negatively associated with the number of chikungunya cases (Fig C in S2 Fig). Such  
355 association was observed for dengue in São Paulo, where low vegetation cover areas presented  
356 higher dengue incidence rates [22]. However, with the inclusion of the spatial component, the effect  
357 of the proportion of green areas moved towards the null. This is possible due to spatial confounding,  
358 which happens when covariates that are spatially smooth are collinear with spatial random effects  
359 [57]. In Rio de Janeiro, the majority of the green areas are in the mountain massifs (Fig 2), which  
360 trespasses different neighbouring borders.

361 The temperature was associated with an increase in the risk of chikungunya in most  
362 neighbourhoods. In our models, we assumed that the temperature presents an effect that is a  
363 combination of an instantaneous effect and of a proportion of this that propagates in time (the  
364 memory effect). Although the instantaneous association is relatively low across the different  
365 neighbourhoods, it can persist for a long period of time for some of the districts. This was only  
366 possible because we allowed the parameters present in the transfer function to change across

367 neighbourhoods. Different areas experiencing heterogeneous temperature effects for *Aedes*-borne  
368 diseases were also observed in previous studies [58,59]. The inclusion of space-varying coefficients  
369 for the temperature improved the fitting of our models.

370         The instantaneous association represents the effect of the temperature on the activity of the  
371 mosquito, human behaviour and the mosquito-virus interaction. The biting rate of the *Ae. aegypti*  
372 increases with the temperature until around 35 °C [10], and people become more exposed to  
373 mosquitoes in warm temperatures. The temperature also accelerates the virus extrinsic incubation  
374 period in the mosquito, and transmission was estimated to peak around 28.5 °C [10]. On the other  
375 hand, the temperature affects the population of mosquitoes by increasing fecundity, egg-to-adult-  
376 survival, development rate and lifespan [10]. This effect is not only on the same week but also  
377 accumulates in time, which is captured by the memory effect.

378         Interestingly, the CHIKV epidemic in Rio de Janeiro in 2016 did not reach the whole city,  
379 with high-risk areas mostly concentrated in the North and Downtown regions. The decrease in the  
380 number of cases coincided with the drop in the minimum temperature, around week 17 (Fig 3A and  
381 4D). These two observations combined suggest that the epidemic was interrupted not because of  
382 susceptible human population depletion in the city, but because the drop in temperature caused a  
383 reduction in the transmission in such a way that the epidemic was not sustained. It is important to  
384 note that although the number of cases diminished substantially, there were still chikungunya cases  
385 being reported until the end of the year. Rio de Janeiro is a tropical city, and the minimum  
386 temperature rarely is below the minimum temperature needed for transmission to occur, of 13.5 °C  
387 [10]. A previous study conducted in the city showed that the *Ae. aegypti* population varies  
388 seasonally, but the mosquito is endemic all over the year [60]. This could explain the long  
389 persistence of the temperature effect in time in some neighbourhoods (Fig 9 and S1 Video).

390         The application of spatial models considering intra-urban scenarios is still growing for  
391 *Aedes*-borne diseases. Our study identified high-risk neighbourhoods for the first chikungunya

392 epidemic in Rio de Janeiro city, which concentrated mostly in the North and Downtown regions  
393 (Fig 10 and S2 Video). Such regions were already identified as high-risk locations for dengue [61].  
394 In our previous study, neighbourhoods from these regions were more likely to constitute  
395 simultaneous clusters for dengue, Zika and chikungunya [62]. These regions have a combination of  
396 factors that favours the *Ae. aegypti*'s ecology and transmission of diseases: low vegetation, low  
397 socioeconomic status and increased temperature (Fig 4). Vector control activities should be  
398 prioritised and intensified in the identified high-risk areas, as they also appear to be the first ones  
399 affected by the epidemic. Additionally, the long persistence of the temperature effect (Fig 9 and S1  
400 Video) and a small number of cases even after the decline of the epidemic, indicate that the  
401 mosquito continues to circulate and to transmit the disease throughout the year. Therefore,  
402 interventions must be designed to be continuous and to work in the long term in these locations.

403 Our study has some limitations. As for any study using secondary data on *Aedes*-borne  
404 diseases, there is an uncertainty on the diagnosis of the reported cases as well as under-reporting. It  
405 is important to consider that, in the same year, the city was also experiencing dengue and Zika  
406 epidemics [62]. Because of the association between Zika and severe congenital manifestations, the  
407 disease awareness around Zika may have improved the reporting rates [63]. However, the  
408 simultaneous occurrence of three arbovirus epidemics may have impaired the differential diagnosis,  
409 as they cause similar symptoms. Another limitation is the spatial unit. We analysed the data  
410 aggregated at the neighbourhood level. Although the data are more reliable at this spatial unit,  
411 smaller areas inside the same neighbourhood can present different socioeconomic and  
412 environmental characteristics. Finer scales such as census tracts should be considered in future  
413 studies. Finally, an important limitation is the assumption that the chikungunya risk is related to the  
414 neighbourhood of residence, while some people may get infected in other locations.

415 The model here presented has the potential to be applied to other cities and other urban  
416 *Aedes*-borne diseases. Mosquito population information is expensive to collect and often unreliable.

417 Therefore not depending on such data is a strength of our model. Another strength is the application  
418 of a transfer function to estimate the non-linear effect of the temperature and its duration. By using  
419 temperature, socioeconomic status and proportion of green areas data as proxies of the key elements  
420 of CHIKV transmission, our model contributed to understanding better the spatio-temporal  
421 dynamics of the first chikungunya epidemic in a tropical metropolitan city. Importantly, our results  
422 indicate that even considering the environment and the temperature, the socioeconomic status plays  
423 a major role in affecting the incidence and distribution of a first *Aedes*-borne disease epidemic in a  
424 large city. This strengthens the importance of improving sanitary conditions and taking measures to  
425 diminish social inequality as necessary actions to control and prevent *Aedes*-borne diseases.

426

## 427 **Acknowledgements**

428 The authors would like to thank the Municipal Secretariat of Health for providing the data on  
429 reported cases, and the meteorological and environmental institutes (INMET, DECEA, INEA,  
430 SMAC and *Alerta Rio*), for making their meteorological data publicly available. We are grateful for  
431 support from the Coordination for the Improvement of Higher Education Personnel (CAPES).

432

## 433 **References**

1. de Souza T, Ribeiro E, Corrêa V, Damasco P, Santos C, de Bruycker-Nogueira F, et al. Following in the Footsteps of the Chikungunya Virus in Brazil: The First Autochthonous Cases in Amapá in 2014 and Its Emergence in Rio de Janeiro during 2016. *Viruses*. 2018;10: 623. doi:10.3390/v10110623
2. WHO. Chikungunya. In: World Health Organization [Internet]. 12 Apr 2017 [cited 16 Jul 2018]. Available: <http://www.who.int/news-room/fact-sheets/detail/chikungunya>
3. Honório NA, Nogueira RMR, Codeço CT, Carvalho MS, Cruz OG, Magalhães M de AFM, et al. Spatial Evaluation and Modeling of Dengue Seroprevalence and Vector Density in Rio de Janeiro, Brazil. Gubler D, editor. *PLoS Neglected Tropical Diseases*. 2009;3: e545. doi:10.1371/journal.pntd.0000545
4. Nogueira RMR, Miagostovich MP, Schatzmayr HG, Santos FB dos, Araújo ESM de, Filippis AMB de, et al. Dengue in the State of Rio de Janeiro, Brazil, 1986-1998. *Memórias do Instituto Oswaldo Cruz*. 1999;94: 297–304. doi:10.1590/S0074-02761999000300004

5. Santos JPC dos, Honório NA, Nobre AA. Definition of persistent areas with increased dengue risk by detecting clusters in populations with differing mobility and immunity in Rio de Janeiro, Brazil. *Cadernos de Saúde Pública*. 2019;35. doi:10.1590/0102-311x00248118
6. Kuno G. Review of the Factors Modulating Dengue Transmission. *Epidemiologic Reviews*. 1995;17: 321–335. doi:10.1093/oxfordjournals.epirev.a036196
7. Randolph SE, Rogers DJ. The arrival, establishment and spread of exotic diseases: patterns and predictions. *Nature Reviews Microbiology*. 2010;8: 361–371. doi:10.1038/nrmicro2336
8. Teixeira MG, Costa M da CN, Barreto F, Barreto ML. Dengue: twenty-five years since reemergence in Brazil. *Cadernos de Saúde Pública*. 2009;25: S7–S18. doi:10.1590/S0102-311X2009001300002
9. Zouache K, Fontaine A, Vega-Rua A, Mousson L, Thiberge J-M, Lourenco-De-Oliveira R, et al. Three-way interactions between mosquito population, viral strain and temperature underlying chikungunya virus transmission potential. *Proceedings of the Royal Society B: Biological Sciences*. 2014;281: 20141078. doi:10.1098/rspb.2014.1078
10. Mordecai EA, Cohen JM, Evans MV, Gudapati P, Johnson LR, Lippi CA, et al. Detecting the impact of temperature on transmission of Zika, dengue, and chikungunya using mechanistic models. Althouse B, editor. *PLOS Neglected Tropical Diseases*. 2017;11: e0005568. doi:10.1371/journal.pntd.0005568
11. Rosa-Freitas MG, Tsouris P, Reis IC, Magalhães M de AFM, Nascimento TFS, Honório NA. Dengue land cover heterogeneity in Rio de Janeiro. *Oecologia Australis*. 2010;14: 641–667. doi:10.4257/oeco.2010.1403.04
12. Carvalho MS, Honorio NA, Garcia LMT, Carvalho LC de S. *Aedes aegypti* control in urban areas: A systemic approach to a complex dynamic. Reiner RC, editor. *PLOS Neglected Tropical Diseases*. 2017;11: e0005632. doi:10.1371/journal.pntd.0005632
13. Honório NA, Castro MG, Barros FSM de, Magalhães M de AFM, Sabroza PC. The spatial distribution of *Aedes aegypti* and *Aedes albopictus* in a transition zone, Rio de Janeiro, Brazil. *Cadernos de Saúde Pública*. 2009;25: 1203–1214. doi:10.1590/S0102-311X2009000600003
14. Flauzino RF, Souza-Santos R, Oliveira RM. Dengue, geoprocessamento e indicadores socioeconômicos e ambientais: um estudo de revisão. *Revista Panamericana de Salud Pública*. 2009;25: 456–461. doi:10.1590/S1020-49892009000500012
15. Carvalho MS, Freitas LP, Cruz OG, Brasil P, Bastos LS. Association of past dengue fever epidemics with the risk of Zika microcephaly at the population level in Brazil. *Scientific Reports*. 2020;10. doi:10.1038/s41598-020-58407-7
16. Lowe R, Gasparini A, Van Meerbeeck CJ, Lippi CA, Mahon R, Trotman AR, et al. Nonlinear and delayed impacts of climate on dengue risk in Barbados: A modelling study. Thomson M, editor. *PLOS Medicine*. 2018;15: e1002613. doi:10.1371/journal.pmed.1002613
17. Lowe R, Bailey TC, Stephenson DB, Graham RJ, Coelho CAS, Sá Carvalho M, et al. Spatio-temporal modelling of climate-sensitive disease risk: Towards an early warning system for dengue in Brazil. *Computers & Geosciences*. 2011;37: 371–381. doi:10.1016/j.cageo.2010.01.008

18. Puggioni G, Couret J, Serman E, Akanda AS, Ginsberg HS. Spatiotemporal modeling of dengue fever risk in Puerto Rico. *Spatial and Spatio-temporal Epidemiology*. 2020;35: 100375. doi:10.1016/j.sste.2020.100375
19. Martínez-Bello D, López-Quílez A, Torres Prieto A. Spatio-Temporal Modeling of Zika and Dengue Infections within Colombia. *International Journal of Environmental Research and Public Health*. 2018;15: 1376. doi:10.3390/ijerph15071376
20. Martínez-Bello DA, López-Quílez A, Torres Prieto A. Relative risk estimation of dengue disease at small spatial scale. *International Journal of Health Geographics*. 2017;16. doi:10.1186/s12942-017-0104-x
21. McHale TC, Romero-Vivas CM, Fronterre C, Arango-Padilla P, Waterlow NR, Nix CD, et al. Spatiotemporal Heterogeneity in the Distribution of Chikungunya and Zika Virus Case Incidences during their 2014 to 2016 Epidemics in Barranquilla, Colombia. *International Journal of Environmental Research and Public Health*. 2019;16: 1759. doi:10.3390/ijerph16101759
22. Teixeira TR de A, Cruz OG. Spatial modeling of dengue and socio-environmental indicators in the city of Rio de Janeiro, Brazil. *Cadernos de Saúde Pública*. 2011;27: 591–602. doi:10.1590/S0102-311X2011000300019
23. Besag J. Spatial Interaction and the Statistical Analysis of Lattice Systems. *Journal of the Royal Statistical Society Series B (Methodological)*. 1974;36: 192–236.
24. Morris M, Wheeler-Martin K, Simpson D, Mooney SJ, Gelman A, DiMaggio C. Bayesian hierarchical spatial models: Implementing the Besag York Mollié model in stan. *Spatial and Spatio-temporal Epidemiology*. 2019;31: 100301. doi:10.1016/j.sste.2019.100301
25. Alves MB, Gamerman D, Ferreira MA. Transfer functions in dynamic generalized linear models. *Statistical Modelling: An International Journal*. 2010;10: 03–40. doi:10.1177/1471082X0801000102
26. Prefeitura do Rio de Janeiro. Rio em Síntese. In: Data Rio [Internet]. [cited 11 Jun 2018]. Available: <http://www.data.rio/pages/rio-em-sntese-2>
27. Cavallieri F, Vial A. Favelas na cidade do Rio de Janeiro: o quadro populacional com base no Censo 2010. Rio de Janeiro, RJ: Instituto Pereira Passos; 2012 p. 20. Report No.: 20120501. Available: [http://portalgeo.rio.rj.gov.br/estudoscariocas/download%5C3190\\_FavelasnacidadedoRiodeJaneiro\\_Censo\\_2010.PDF](http://portalgeo.rio.rj.gov.br/estudoscariocas/download%5C3190_FavelasnacidadedoRiodeJaneiro_Censo_2010.PDF)
28. Prefeitura do Rio de Janeiro, Secretaria Municipal de Saúde. Chikungunya. Available: <http://www.rio.rj.gov.br/web/sms/exibeConteudo?id=4769664>
29. Ministério da Saúde. Chikungunya: manejo clínico. Brasília, DF; 2017. Available: [http://bvsms.saude.gov.br/bvs/publicacoes/chikungunya\\_manejo\\_clinico\\_1ed.pdf](http://bvsms.saude.gov.br/bvs/publicacoes/chikungunya_manejo_clinico_1ed.pdf)
30. Prefeitura do Rio de Janeiro. Índice de Desenvolvimento Social (IDS) por Áreas de Planejamento (AP), Regiões de Planejamento (RP), Regiões Administrativas (RA), Bairros e Favelas do Município do Rio de Janeiro - 2010. In: Data Rio [Internet]. 29 May 2019 [cited 10 Sep 2019]. Available: <http://www.data.rio/datasets/fa85ddc76a524380ad7fc60e3006ee97>

31. Prefeitura do Rio de Janeiro. População residente, por idade e por grupos de idade, segundo as Áreas de Planejamento (AP), Regiões Administrativas (RA) e Bairros em 2000/2010. In: Data Rio [Internet]. 30 May 2019 [cited 10 Sep 2019]. Available: <http://www.data.rio/datasets/e68e54eaa6bb484dbb40828acf2b3e7e>
32. Prefeitura do Rio de Janeiro. Uso do Solo 2015. In: Data Rio [Internet]. 18 Jul 2019 [cited 10 Sep 2019]. Available: [http://www.data.rio/datasets/e74a94ac95d440d19b3e18c23bc485de\\_6](http://www.data.rio/datasets/e74a94ac95d440d19b3e18c23bc485de_6)
33. INMET. Estações Automáticas. In: INMET - Instituto Nacional de Meteorologia [Internet]. [cited 24 May 2020]. Available: <http://www.inmet.gov.br/portal/index.php?r=estacoes/estacoesAutomaticas>
34. DECEA. REDEMET - Painel de consulta. In: Rede de Meteorologia do Comando da Aeronáutica [Internet]. [cited 25 May 2020]. Available: <https://www.redemet.aer.mil.br/?i=produtos&p=consulta-de-mensagens-opmet>
35. INEA. Dados do Monitoramento da Qualidade do Ar e Meteorologia. In: Instituto Estadual do Ambiente Rio de Janeiro [Internet]. [cited 24 May 2020]. Available: <http://200.20.53.25/qualiar/home/index>
36. SMAC. Dados horários do monitoramento da qualidade do ar - MonitorAr. In: Data Rio [Internet]. [cited 25 May 2020]. Available: <http://www.data.rio/datasets/dados-hor%C3%A1rios-do-monitoramento-da-qualidade-do-ar-monitorar?orderBy=Data>
37. Prefeitura do Rio de Janeiro. Dados Meteorológicos. In: Sistema Alerta Rio [Internet]. [cited 24 May 2020]. Available: <http://alertario.rio.rj.gov.br/download/dados-meteorologicos/>
38. World Meteorological Organization, editor. Guide to the global observing system. 3rd ed. Geneva: World Meteorological Organization; 2007.
39. Gomes AF, Nobre AA, Cruz OG. Temporal analysis of the relationship between dengue and meteorological variables in the city of Rio de Janeiro, Brazil, 2001-2009. *Cadernos de Saúde Pública*. 2012;28: 2189–2197. doi:10.1590/S0102-311X2012001100018
40. Lowe R, Stewart-Ibarra AM, Petrova D, García-Díez M, Borbor-Cordova MJ, Mejía R, et al. Climate services for health: predicting the evolution of the 2016 dengue season in Machala, Ecuador. *The Lancet Planetary Health*. 2017;1: e142–e151. doi:10.1016/S2542-5196(17)30064-5
41. Diggle P, Ribeiro PJ. *Model-based Geostatistics*. New York: Springer-Verlag; 2007. doi:10.1007/978-0-387-48536-2
42. The R Foundation for Statistical Computing. R. The R Foundation; 2020. Available: <https://www.r-project.org/>
43. Pebesma E, Bivand R, Racine E, Sumner M, Cook I, Keitt T, et al. sf: Simple Features for R. 2019. Available: <https://CRAN.R-project.org/package=sf>
44. Ribeiro PJ, Diggle PJ. geoR: A Package for Geostatistical Analysis. *R-NEWS*. 2001;1: 15–18.
45. Wickham H, RStudio. tidyverse: Easily Install and Load the “Tidyverse.” 2017. Available: <https://CRAN.R-project.org/package=tidyverse>



46. Stan Development Team. Stan Reference Manual. Version 2.23. Available: [https://mc-stan.org/docs/2\\_23/reference-manual/notation-for-samples-chains-and-draws.html](https://mc-stan.org/docs/2_23/reference-manual/notation-for-samples-chains-and-draws.html)
47. Carpenter B, Gelman A, Hoffman MD, Lee D, Goodrich B, Betancourt M, et al. *Stan*: A Probabilistic Programming Language. *Journal of Statistical Software*. 2017;76. doi:10.18637/jss.v076.i01
48. Watanabe S. Asymptotic Equivalence of Bayes Cross Validation and Widely Applicable Information Criterion in Singular Learning Theory. 2010; 24.
49. Gelman A, Rubin DB. Inference from Iterative Simulation Using Multiple Sequences. *Statistical Science*. 1992;7: 457–472. doi:10.1214/ss/1177011136
50. Riebler A, Sørbye SH, Simpson D, Rue H. An intuitive Bayesian spatial model for disease mapping that accounts for scaling: *Statistical Methods in Medical Research*. 2016 [cited 29 Apr 2020]. doi:10.1177/0962280216660421
51. Guo J, Gabry J, Goodrich B, Lee D, Sakrejda K, Martin M, et al. rstan: R Interface to Stan. 2019. Available: <https://CRAN.R-project.org/package=rstan>
52. Vehtari A, Gelman A, Gabry J. Practical Bayesian model evaluation using leave-one-out cross-validation and WAIC. *Statistics and Computing*. 2017;27: 1413–1432. doi:10.1007/s11222-016-9696-4
53. Freitas LP, Schmidt AM. *laispfreitas/ICAR\_chikungunya*: The role of socioeconomic status, environment, and temperature in the spatio-temporal distribution of the first Chikungunya epidemic in the city of Rio de Janeiro, Brazil. Zenodo; 2020. doi:10.5281/ZENODO.3936204
54. QGIS Development Team. QGIS Geographic Information System. Open Source Geospatial Foundation Project; 2020. Available: <https://qgis.org/en/site/>
55. Wickham H. *ggplot2: Elegant Graphics for Data Analysis*. Springer-Verlag. 2016. Available: <https://ggplot2.tidyverse.org/>
56. Bonifay T, Douine M, Bonnefoy C, Hurpeau B, Nacher M, Djossou F, et al. Poverty and Arbovirus Outbreaks: When Chikungunya Virus Hits More Precarious Populations Than Dengue Virus in French Guiana. *Open Forum Infectious Diseases*. 2017;4. doi:10.1093/ofid/ofx247
57. Clayton DG, Bernardinelli L, Montomoli C. Spatial Correlation in Ecological Analysis. *International Journal of Epidemiology*. 1993;22: 1193–1202. doi:10.1093/ije/22.6.1193
58. Xu Z, Bambrick H, Yakob L, Devine G, Lu J, Frentiu FD, et al. Spatiotemporal patterns and climatic drivers of severe dengue in Thailand. *Science of The Total Environment*. 2019;656: 889–901. doi:10.1016/j.scitotenv.2018.11.395
59. Lauer SA, Sakrejda K, Ray EL, Keegan LT, Bi Q, Suangtho P, et al. Prospective forecasts of annual dengue hemorrhagic fever incidence in Thailand, 2010–2014. *Proceedings of the National Academy of Sciences*. 2018;115: E2175–E2182. doi:10.1073/pnas.1714457115
60. Honório NA, Codeço CT, Alves FC, Magalhães M de AFM, Lourenço-de-Oliveira R. Temporal Distribution of *Aedes aegypti* in Different Districts of Rio De Janeiro, Brazil,



Measured by Two Types of Traps. *Journal of Medical Entomology*. 2009;46: 1001–1014. doi:10.1603/033.046.0505

61. Xavier DR, Magalhães M de AFM, Gracie R, Reis IC dos, Matos VP de, Barcellos C. Difusão espaço-tempo do dengue no Município do Rio de Janeiro, Brasil, no período de 2000-2013. *Cadernos de Saúde Pública*. 2017;33. doi:10.1590/0102-311x00186615
62. Freitas LP, Cruz OG, Lowe R, Sá Carvalho M. Space–time dynamics of a triple epidemic: dengue, chikungunya and Zika clusters in the city of Rio de Janeiro. *Proceedings of the Royal Society B: Biological Sciences*. 2019;286: 20191867. doi:10.1098/rspb.2019.1867
63. Lowe R, Barcellos C, Brasil P, Cruz OG, Honório NA, Kuper H, et al. The Zika Virus Epidemic in Brazil: From Discovery to Future Implications. *International Journal of Environmental Research and Public Health*. 2018;15: 96. doi:10.3390/ijerph15010096

434

435 **S1 Fig. Meteorological weather stations (red dots) in the 500m X 500m grid and**  
436 **neighbourhoods, Rio de Janeiro city, Brazil.**

437

438 **S1 Appendix. Models structures explored to estimate  $\mu_{i,t}$  and each Watanabe-Akaike**  
439 **information criterion (WAIC).**

440

441 **S2 Fig. Time-varying coefficients (in the log scale, mean and 90% credible interval) for**  
442 **sociodevelopment index (SDI) (A,B) and proportion of green areas (C,D) without (model 1)**  
443 **and with (model 2) spatial dependency, for chikungunya cases from weeks 9 to 52 2016, Rio de**  
444 **Janeiro city, Brazil.**

445

446 **S3 Fig. Correlation between the spatial effects (in the log scale) of Model 0 versus Model 4, by**  
447 **neighbourhood, weeks 9 to 52 2016, Rio de Janeiro city, Brazil.**

448

449 **S4 Fig. Impulse response of the minimum temperature, posterior mean and 90% credible**  
450 **interval, by neighbourhood, Rio de Janeiro city, Brazil.**

451

452 **S1 Video. Minimum temperature instantaneous effect on chikungunya cases and its**  
453 **propagation in time by neighbourhood, controlling for sociodevelopment index and**  
454 **proportion of green areas, and the latent spatial effect, Rio de Janeiro city, Brazil.**

455

456 **S2 Video. Posterior chikungunya relative risk by neighbourhood, controlling for**  
457 **sociodevelopment index, proportion of green areas and minimum temperature, and the latent**  
458 **spatial effect, weeks 9 to 52 2016, Rio de Janeiro city, Brazil.**

459

460 **S5 Fig. Classification of the chikungunya relative risk by neighbourhood in selected weeks**  
461 **based on the 90% credible interval (controlling for sociodevelopment index, proportion of**  
462 **green areas and minimum temperature, and the latent spatial effect), Rio de Janeiro city,**  
463 **Brazil. Risk: 90%CI >1. Protection: 90%CI <1. None: 90%CI includes 1.**
